# Supplementary material for: Conditional power of antidepressant network meta-analysis
Source: Springer Nature journal article supplement (doi:10.1186/s12888-021-03094-5), 2021-03-05
Supplement: MOESM1 [file 18935132]

# Supplementary appendix 1: Conditional power of antidepressant network meta-analysis

Holper L, Department of Psychiatry, Psychotherapy, and Psychosomatics, University Hospital of Psychiatry, University of Zurich, Lenggstrasse 31, 8032 Zurich, Switzerland

## Contents

|   |                                        |    |
|---|----------------------------------------|----|
| 1 | Data sources                           | 2  |
| 2 | Conditional power main analysis        | 7  |
| 3 | Conditional power sensitivity analysis | 20 |
| 4 | List of included studies               | 35 |

## List of Figures

|    |                                                     |    |
|----|-----------------------------------------------------|----|
| 1a | PRISMA flow diagram                                 | 2  |
| 1b | Forest plot efficacy                                | 4  |
| 1c | Forest plot tolerability                            | 5  |
| 1d | Correlation between original and dummy effect sizes | 6  |
| 2  | Network graphs                                      | 7  |
| 3a | Sensitivity analysis trial design: $r$              | 20 |
| 3b | Sensitivity analysis effect size: $f_{xy}$          | 33 |
| 3c | Sensitivity analysis event probability: $pc$        | 34 |

## List of Tables

|    |                                                |    |
|----|------------------------------------------------|----|
| 1  | PRISMA checklist                               | 3  |
| 2a | Main analysis efficacy                         | 8  |
| 2b | Main analysis tolerability                     | 14 |
| 3a | Sensitivity analysis trial design efficacy     | 21 |
| 3b | Sensitivity analysis trial design tolerability | 27 |
| 4  | List of included studies                       | 35 |

# 1 Data sources

**Figure 1a: PRISMA flow diagram.** PRISMA (Preferred Reporting Items for Systematic Reviews and Meta-Analyses) flow diagram [1]. The analysis was based on a total of 535 RCTs (445 published studies, 94 unpublished studies) conducted between 1979 and 2018. 522 trials constituted the GRISELDA dataset [2] comparing 21 antidepressants provided by Cipriani et al. [3]. Additional 13 trials [4–16] were identified by own literature search. Efficacy (continuous) outcome was change on the Hamilton Depression Scale (HAMD) [17], for which information was available in 438 trials. Tolerability (binary) outcome was dropout rate due to adverse events, for which information was available in 438 trials. Response and remission rates were not assessed due to well-known methodological problems arising from dichotomization such as reduced statistical power (SP) and inflated effect sizes [18–21].

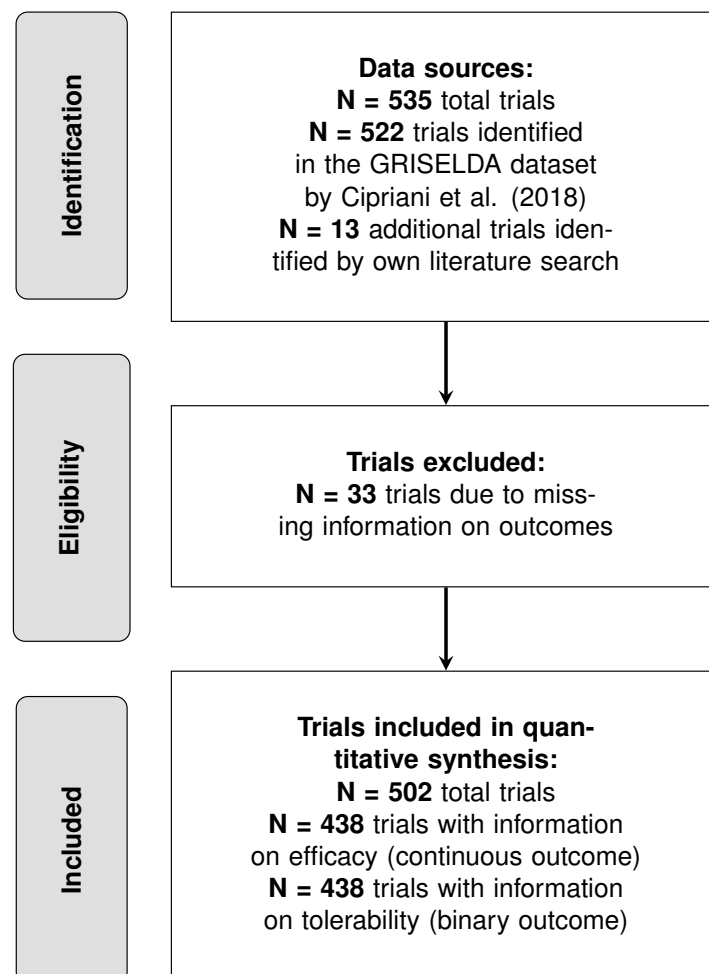

**Table 1: PRISMA checklist.** PRISMA (Preferred Reporting Items for Systematic Reviews and Meta-Analyses) checklist [1]. Risk of bias (RoB); not applicable (NA).

| Section Title                   | Item | Checklist                                                                                                                                                                                              | Page |
|---------------------------------|------|--------------------------------------------------------------------------------------------------------------------------------------------------------------------------------------------------------|------|
| Title                           | 1    | Identify report as systematic review or meta-analysis, or both.                                                                                                                                        | 1    |
| <b>Abstract</b>                 |      |                                                                                                                                                                                                        |      |
| Structured summary              | 2    | Provide structured summary including: background; objectives; data sources; study eligibility criteria; study appraisal and synthesis methods; results; limitations; conclusions; registration number. | 1    |
| <b>Introduction</b>             |      |                                                                                                                                                                                                        |      |
| Rationale                       | 3    | Describe rationale in the context of what is already known.                                                                                                                                            | 3    |
| Objectives                      | 4    | Provide explicit statement of questions with reference to participants, interventions, comparisons, outcomes, and study design.                                                                        | 3    |
| <b>Methods</b>                  |      |                                                                                                                                                                                                        |      |
| Protocol and registration       | 5    | Indicate if review protocol exists and where it can be accessed, provide registration information including registration number.                                                                       | NA   |
| Eligibility criteria            | 6    | Specify study characteristics and report characteristics used as criteria for eligibility.                                                                                                             | 3    |
| Information sources             | 7    | Describe all information sources in the search and date last searched.                                                                                                                                 | NA   |
| Search                          | 8    | Present full electronic search strategy for at least one database, including any limits used, such that it could be repeated.                                                                          | NA   |
| Study selection                 | 9    | State the process for selecting studies.                                                                                                                                                               | S1   |
| Data collection process         | 10   | Describe method of data extraction from reports and any processes for obtaining and confirming data from investigators.                                                                                | NA   |
| Data items                      | 11   | List and define all variables for which data were sought and any assumptions and simplifications made.                                                                                                 | 3    |
| Risk of bias individual studies | 12   | Describe methods for assessing risk of bias of individual studies and how this information is to be used in any data synthesis.                                                                        | NA   |
| Summary measures                | 13   | State the principal summary measures.                                                                                                                                                                  | 4    |
| Synthesis of results            | 14   | Describe methods of handling data and combining results of studies, if done, including measures of consistency for each meta-analysis.                                                                 | 4    |
| Risk of bias across studies     | 15   | Specify any assessment of risk of bias that may affect the cumulative evidence.                                                                                                                        | NA   |
| Additional analyses             | 16   | Describe methods of additional analyses, if done, indicating which were pre-specified.                                                                                                                 | 4    |
| <b>Results</b>                  |      |                                                                                                                                                                                                        |      |
| Study selection                 | 17   | Give numbers of studies screened, assessed for eligibility, and included in the review, with reasons for exclusions at each stage.                                                                     | S1   |
| Study characteristics           | 18   | For each study, present characteristics for which data were extracted and provide the citations.                                                                                                       | NA   |
| Risk of bias within studies     | 19   | Present data on risk of bias of each study and, if available, any outcome level assessment (see item 12).                                                                                              | NA   |
| Results individual studies      | 20   | For all outcomes, present, for each study: (a) simple summary data for each intervention group (b) effect estimates and confidence intervals.                                                          | S1   |
| Synthesis of results            | 21   | Present main results of the review. If meta-analyses are done, include for each, confidence intervals and measures of consistency.                                                                     | 5    |
| Risk of bias across studies     | 22   | Present results of any assessment of risk of bias across studies (see item 15).                                                                                                                        | NA   |
| Additional analysis             | 23   | Give results of additional analyses (see item 16).                                                                                                                                                     | S1   |
| <b>Discussion</b>               |      |                                                                                                                                                                                                        |      |
| Summary of evidence             | 24   | Summarize main findings including the strength of evidence for each outcome; consider their relevance to key groups.                                                                                   | 6    |
| Limitations                     | 25   | Discuss limitations at study and outcome level and at review-level.                                                                                                                                    | 7    |
| Conclusions                     | 26   | Provide a general interpretation of the results in the context of other evidence, and implications for future research.                                                                                | 7    |
| <b>Funding</b>                  |      |                                                                                                                                                                                                        |      |
| Funding                         | 27   | Describe sources of funding and other support.                                                                                                                                                         | 7    |

**Figure 1b: Forest plot efficacy.** Forest plots illustrating drug-placebo effects for efficacy on the standardized mean difference (SMD) scale. Square size is proportionate to actual sample size.

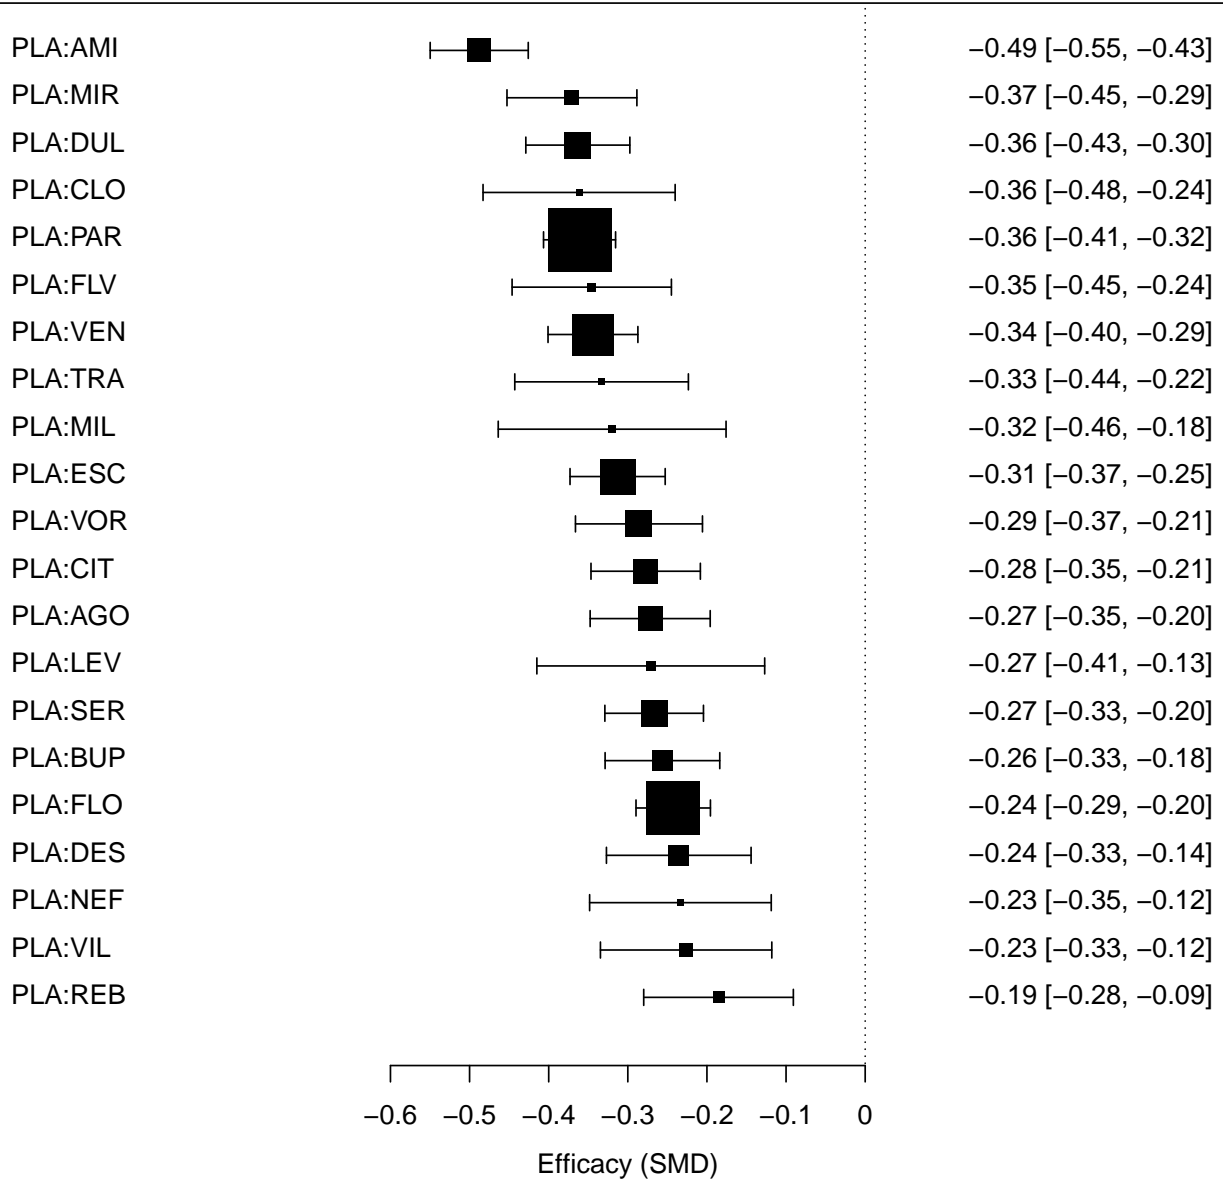

**Figure 1c: Forest plot tolerability.** Forest plots illustrating drug-placebo effects for tolerability on the odds ratio (OR) scale. Square size is proportionate to actual sample size.

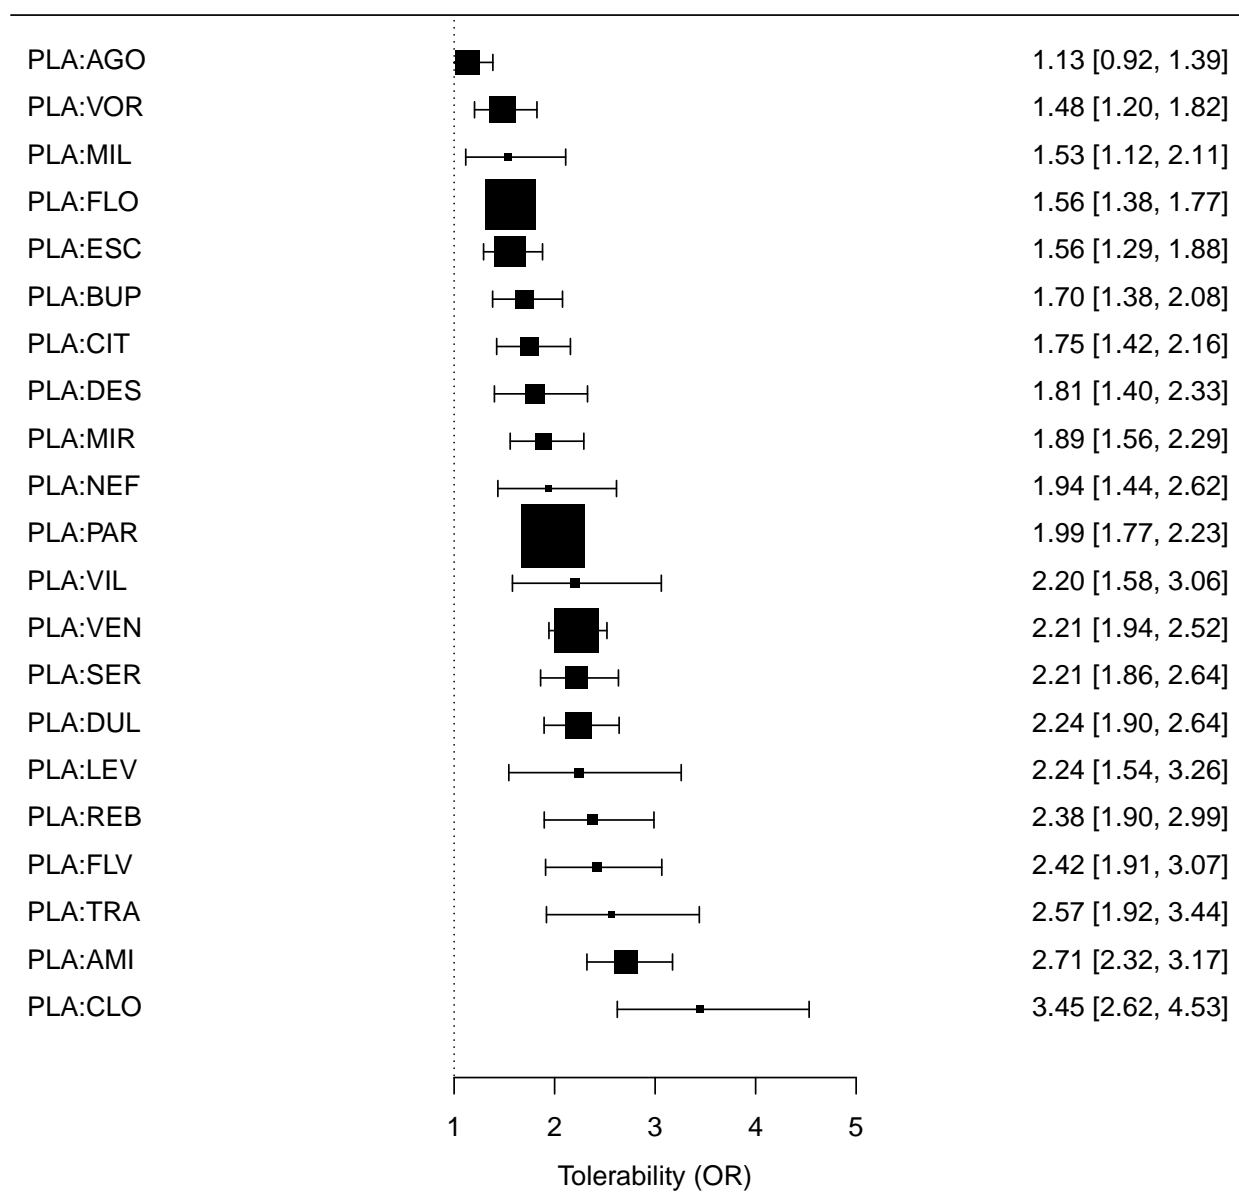

**Figure 1d: Correlation between original and dummy effect sizes.** Scatter plot illustrating the correlation between original and dummy effect sizes, for efficacy estimated on the standardized mean difference (SMD) scale (Pearson  $r = 0.999$ ), and for tolerability estimated on the odds ratio (OR) scale (Pearson  $r = 0.995$ ). Dummy effect sizes were used to estimate conditional power in both direct and not-direct observed comparisons; on the latter conditional power could otherwise not be assessed.

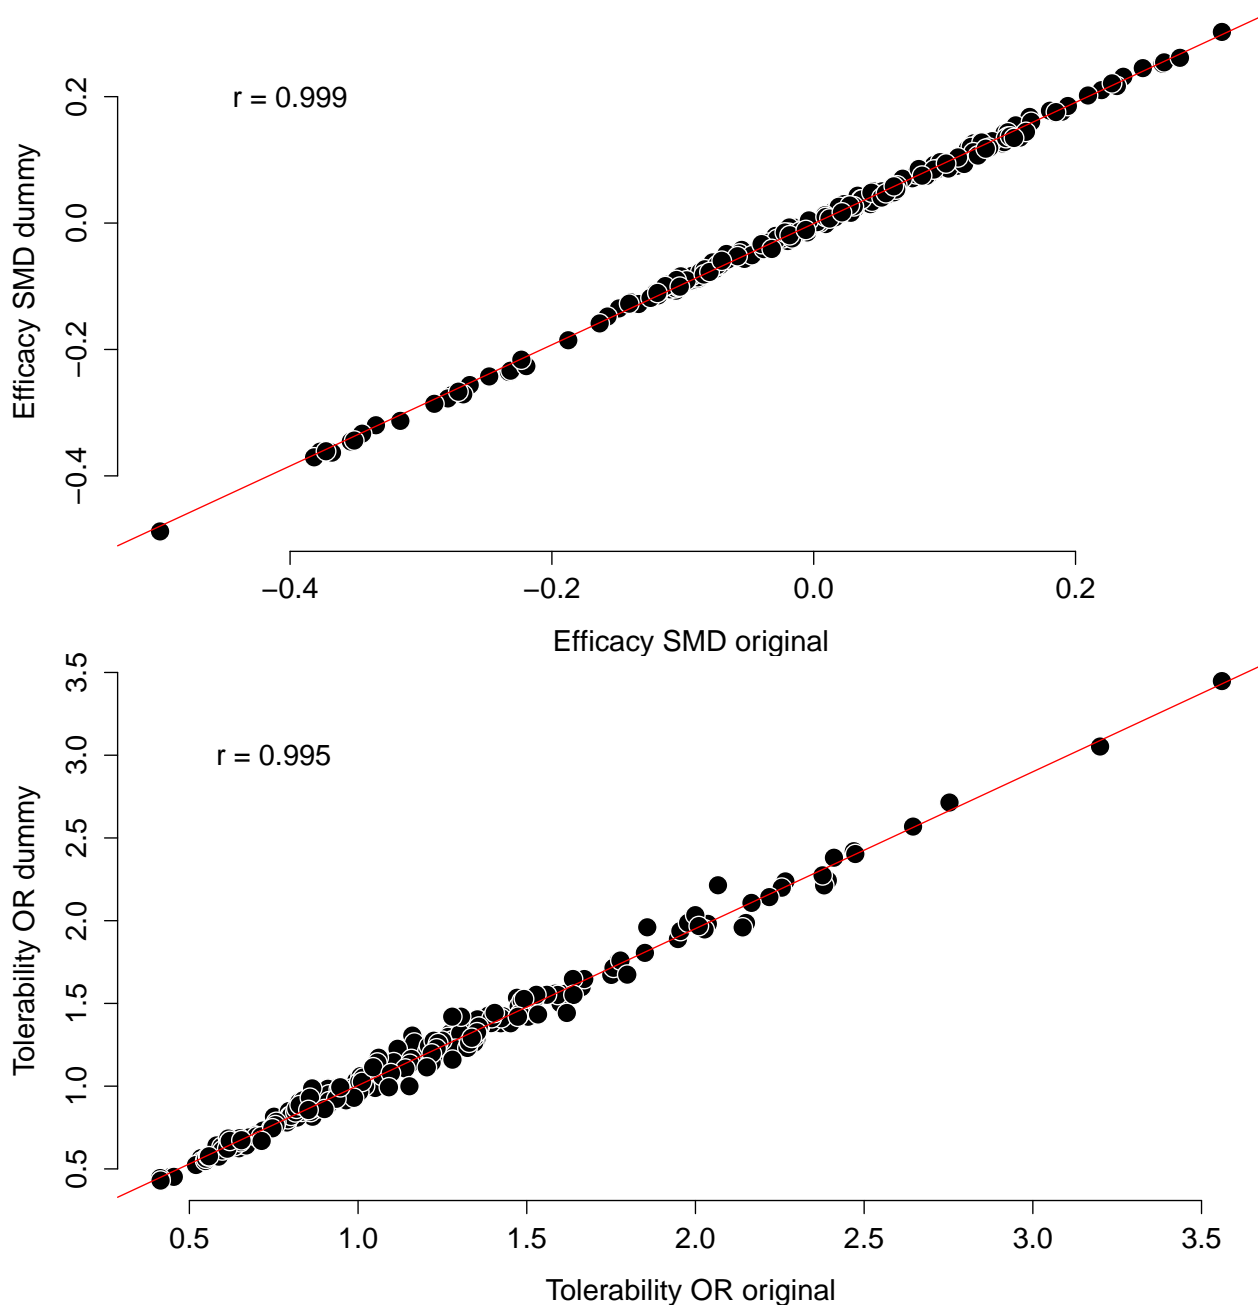

## 2 Conditional power main analysis

**Figure 2: Network graphs.** Illustration of treatment eligible comparisons in the original network and separately for comparisons with conclusive versus inconclusive evidence. Circle size is proportionate to actual sample size. For comparisons with conclusive evidence, line width is set to 1. For comparisons with inconclusive evidence, line width is proportionate to the sample size at 80% conditional power ( $N_{CP=80\%}$ ).

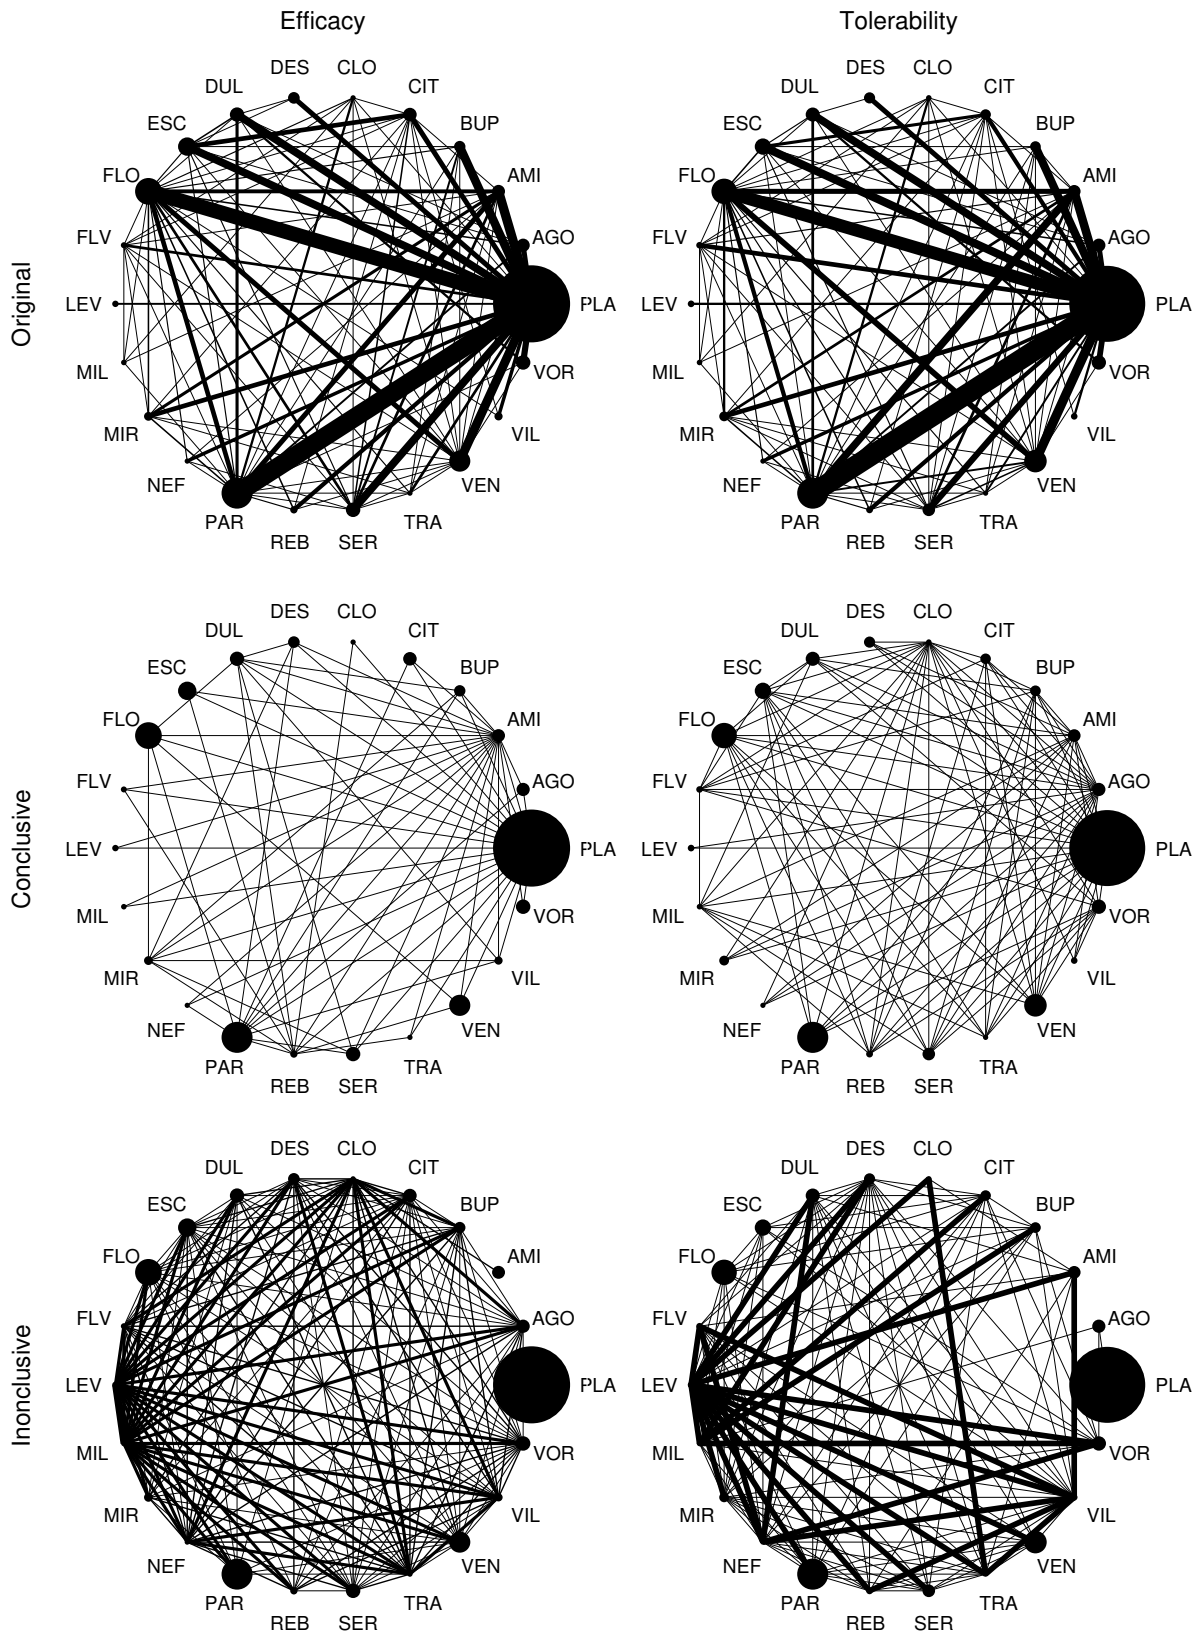

**Table 2a: Main analysis efficacy.** Listed are network characteristics for each of the 231 comparisons regarding the conclusiveness of evidence (conclusive or inconclusive), the number of trials, sample size, study year range of completion (only for direct comparisons), and network effect estimates with 95% confidence intervals on the standardized mean difference (SMD [95%CI]) scale. Listed are results of the conditional power analysis in terms of the sample size at 20% and 80% conditional power ( $N_{CP=20\%}$ ,  $N_{CP=80\%}$ ). Results are shown based on the main analysis considering a trial design ratio of  $r = 1/0$ , anticipated alternative effect sizes equal to the network estimates ( $f_{xyN}$ ), and anticipated event probabilities equal to the average network event probability ( $p_{cN}$ ).

|         | Network      |        |        |            |                     | Conditional power |               |
|---------|--------------|--------|--------|------------|---------------------|-------------------|---------------|
|         | Evidence     | Trials | Sample | Year range | SMD [95%CI]         | $N_{CP=20\%}$     | $N_{CP=80\%}$ |
| PLA:AGO | conclusive   | 13     | 4173   | 1999-2011  | -0.27 [-0.35–0.20]  | -                 | -             |
| PLA:AMI | conclusive   | 24     | 3055   | 1977-1995  | -0.49 [-0.55–0.43]  | -                 | -             |
| PLA:BUP | conclusive   | 22     | 5268   | 1980-2012  | -0.26 [-0.33–0.18]  | -                 | -             |
| PLA:CIT | conclusive   | 13     | 3786   | 1992-2013  | -0.28 [-0.35–0.21]  | -                 | -             |
| PLA:CLO | conclusive   | 1      | 38     | 1987-1987  | -0.36 [-0.48–0.24]  | -                 | -             |
| PLA:DES | conclusive   | 13     | 5604   | 2004-2012  | -0.24 [-0.33–0.14]  | -                 | -             |
| PLA:DUL | conclusive   | 20     | 5587   | 2000-2014  | -0.36 [-0.43–0.30]  | -                 | -             |
| PLA:ESC | conclusive   | 20     | 6223   | 2000-2010  | -0.31 [-0.37–0.25]  | -                 | -             |
| PLA:FLO | conclusive   | 38     | 8460   | 1983-2014  | -0.24 [-0.29–0.20]  | -                 | -             |
| PLA:FLV | conclusive   | 7      | 991    | 1982-1994  | -0.35 [-0.45–0.24]  | -                 | -             |
| PLA:LEV | conclusive   | 5      | 2654   | 2007-2012  | -0.27 [-0.41–0.13]  | -                 | -             |
| PLA:MIL | conclusive   | -      | -      | -          | -0.32 [-0.46–0.18]  | -                 | -             |
| PLA:MIR | conclusive   | 12     | 1465   | 1985-2007  | -0.37 [-0.45–0.29]  | -                 | -             |
| PLA:NEF | conclusive   | 9      | 1362   | 1990-1996  | -0.23 [-0.35–0.12]  | -                 | -             |
| PLA:PAR | conclusive   | 48     | 9726   | 1984-2014  | -0.36 [-0.41–0.32]  | -                 | -             |
| PLA:REB | conclusive   | 11     | 2612   | 1991-2001  | -0.19 [-0.28–0.09]  | -                 | -             |
| PLA:SER | conclusive   | 20     | 4403   | 1989-2013  | -0.27 [-0.33–0.20]  | -                 | -             |
| PLA:TRA | conclusive   | 7      | 1230   | 1978-2013  | -0.33 [-0.44–0.22]  | -                 | -             |
| PLA:VEN | conclusive   | 23     | 5724   | 1991-2014  | -0.34 [-0.40–0.29]  | -                 | -             |
| PLA:VIL | conclusive   | 9      | 3978   | 2007-2013  | -0.23 [-0.33–0.12]  | -                 | -             |
| PLA:VOR | conclusive   | 16     | 6908   | 2007-2017  | -0.29 [-0.37–0.21]  | -                 | -             |
| AGO:AMI | conclusive   | -      | -      | -          | -0.22 [-0.31–0.12]  | -                 | -             |
| AGO:BUP | inconclusive | -      | -      | -          | 0.02 [-0.09- 0.12]  | 343               | 2176          |
| AGO:CIT | inconclusive | -      | -      | -          | -0.01 [-0.11- 0.09] | 351               | 2252          |
| AGO:CLO | inconclusive | -      | -      | -          | -0.09 [-0.23- 0.05] | 153               | 1304          |
| AGO:DES | inconclusive | -      | -      | -          | 0.04 [-0.08- 0.15]  | 300               | 1801          |
| AGO:DUL | inconclusive | 1      | 418    | 2008-2008  | -0.09 [-0.19- 0.00] | 49                | 2142          |
| AGO:ESC | inconclusive | 2      | 462    | 2006-2008  | -0.04 [-0.13- 0.05] | 322               | 2475          |
| AGO:FLO | inconclusive | 4      | 1862   | 1999-2012  | 0.03 [-0.05- 0.11]  | 381               | 2942          |
| AGO:FLV | inconclusive | -      | -      | -          | -0.07 [-0.20- 0.05] | 194               | 1553          |
| AGO:LEV | inconclusive | -      | -      | -          | 0.00 [-0.16- 0.16]  | 252               | 1175          |
| AGO:MIL | inconclusive | -      | -      | -          | -0.05 [-0.21- 0.11] | 229               | 1156          |



|         |              |    |      |           |                     |     |      |
|---------|--------------|----|------|-----------|---------------------|-----|------|
| AGO:MIR | inconclusive | -  | -    | -         | -0.10 [-0.21- 0.01] | 66  | 1799 |
| AGO:NEF | inconclusive | -  | -    | -         | 0.04 [-0.10- 0.17]  | 275 | 1480 |
| AGO:PAR | conclusive   | 5  | 1648 | 1999-2008 | -0.09 [-0.17-0.01]  | -   | -    |
| AGO:REB | inconclusive | -  | -    | -         | 0.09 [-0.03- 0.21]  | 156 | 1797 |
| AGO:SER | inconclusive | -  | -    | -         | 0.01 [-0.09- 0.10]  | 368 | 2412 |
| AGO:TRA | inconclusive | -  | -    | -         | -0.06 [-0.19- 0.07] | 222 | 1450 |
| AGO:VEN | inconclusive | 2  | 609  | 2002-2002 | -0.07 [-0.16- 0.02] | 130 | 2494 |
| AGO:VIL | inconclusive | -  | -    | -         | 0.05 [-0.09- 0.18]  | 274 | 1555 |
| AGO:VOR | inconclusive | -  | -    | -         | -0.01 [-0.12- 0.09] | 326 | 1986 |
| AMI:BUP | conclusive   | -  | -    | -         | 0.23 [ 0.14- 0.32]  | -   | -    |
| AMI:CIT | conclusive   | 2  | 409  | 1984-1996 | 0.21 [ 0.12- 0.30]  | -   | -    |
| AMI:CLO | inconclusive | -  | -    | -         | 0.13 [-0.01- 0.26]  | 58  | 1576 |
| AMI:DES | conclusive   | -  | -    | -         | 0.25 [ 0.14- 0.36]  | -   | -    |
| AMI:DUL | conclusive   | -  | -    | -         | 0.12 [ 0.04- 0.21]  | -   | -    |
| AMI:ESC | conclusive   | -  | -    | -         | 0.17 [ 0.09- 0.26]  | -   | -    |
| AMI:FLO | conclusive   | 10 | 796  | 1983-1997 | 0.25 [ 0.18- 0.32]  | -   | -    |
| AMI:FLV | conclusive   | 1  | 235  | 1996-1996 | 0.14 [ 0.03- 0.25]  | -   | -    |
| AMI:LEV | conclusive   | -  | -    | -         | 0.22 [ 0.06- 0.37]  | -   | -    |
| AMI:MIL | conclusive   | 2  | 231  | 1987-1987 | 0.17 [ 0.02- 0.32]  | -   | -    |
| AMI:MIR | conclusive   | 8  | 895  | 1988-1995 | 0.12 [ 0.02- 0.21]  | -   | -    |
| AMI:NEF | conclusive   | 1  | 106  | 1992-1992 | 0.25 [ 0.13- 0.38]  | -   | -    |
| AMI:PAR | conclusive   | 13 | 1813 | 1985-2000 | 0.13 [ 0.06- 0.19]  | -   | -    |
| AMI:REB | conclusive   | -  | -    | -         | 0.30 [ 0.19- 0.41]  | -   | -    |
| AMI:SER | conclusive   | 7  | 1432 | 1988-1998 | 0.22 [ 0.14- 0.30]  | -   | -    |
| AMI:TRA | conclusive   | 2  | 207  | 1980-1987 | 0.15 [ 0.03- 0.28]  | -   | -    |
| AMI:VEN | conclusive   | 2  | 272  | 1998-2001 | 0.14 [ 0.06- 0.22]  | -   | -    |
| AMI:VIL | conclusive   | -  | -    | -         | 0.26 [ 0.14- 0.39]  | -   | -    |
| AMI:VOR | conclusive   | -  | -    | -         | 0.20 [ 0.10- 0.30]  | -   | -    |
| BUP:CIT | inconclusive | -  | -    | -         | -0.02 [-0.12- 0.08] | 346 | 2302 |
| BUP:CLO | inconclusive | -  | -    | -         | -0.11 [-0.24- 0.03] | 109 | 1295 |
| BUP:DES | inconclusive | -  | -    | -         | 0.02 [-0.10- 0.14]  | 313 | 1834 |
| BUP:DUL | conclusive   | -  | -    | -         | -0.11 [-0.20-0.01]  | -   | -    |
| BUP:ESC | inconclusive | 2  | 566  | 2004-2004 | -0.06 [-0.15- 0.03] | 254 | 2486 |
| BUP:FLO | inconclusive | 3  | 740  | 1989-2000 | 0.01 [-0.07- 0.10]  | 406 | 2963 |
| BUP:FLV | inconclusive | -  | -    | -         | -0.09 [-0.21- 0.03] | 131 | 1555 |
| BUP:LEV | inconclusive | -  | -    | -         | -0.01 [-0.18- 0.15] | 250 | 1176 |
| BUP:MIL | inconclusive | -  | -    | -         | -0.06 [-0.22- 0.10] | 213 | 1147 |
| BUP:MIR | conclusive   | -  | -    | -         | -0.11 [-0.22-0.01]  | -   | -    |
| BUP:NEF | inconclusive | -  | -    | -         | 0.02 [-0.11- 0.16]  | 284 | 1493 |
| BUP:PAR | conclusive   | 2  | 218  | 2001-2009 | -0.10 [-0.19-0.02]  | -   | -    |
| BUP:REB | inconclusive | -  | -    | -         | 0.07 [-0.05- 0.19]  | 224 | 1824 |
| BUP:SER | inconclusive | 5  | 991  | 1995-2001 | -0.01 [-0.10- 0.08] | 385 | 2648 |

|         |              |    |      |           |                     |     |      |
|---------|--------------|----|------|-----------|---------------------|-----|------|
| BUP:TRA | inconclusive | 1  | 124  | 1992-1992 | -0.08 [-0.20- 0.05] | 187 | 1493 |
| BUP:VEN | inconclusive | 2  | 725  | 2004-2005 | -0.09 [-0.18- 0.00] | 54  | 2499 |
| BUP:VIL | inconclusive | -  | -    | -         | 0.03 [-0.10- 0.16]  | 287 | 1574 |
| BUP:VOR | inconclusive | -  | -    | -         | -0.03 [-0.14- 0.08] | 318 | 2018 |
| CIT:CLO | inconclusive | 1  | 114  | 1984-1984 | -0.08 [-0.22- 0.05] | 131 | 1349 |
| CIT:DES | inconclusive | -  | -    | -         | 0.04 [-0.07- 0.16]  | 301 | 1911 |
| CIT:DUL | inconclusive | -  | -    | -         | -0.09 [-0.18- 0.01] | 59  | 2319 |
| CIT:ESC | inconclusive | 12 | 2400 | 2000-2011 | -0.04 [-0.12- 0.04] | 341 | 3034 |
| CIT:FLO | inconclusive | 2  | 673  | 1994-1995 | 0.03 [-0.04- 0.11]  | 375 | 3208 |
| CIT:FLV | inconclusive | 1  | 217  | 1991-1991 | -0.07 [-0.19- 0.05] | 225 | 1706 |
| CIT:LEV | inconclusive | -  | -    | -         | 0.01 [-0.15- 0.17]  | 256 | 1205 |
| CIT:MIL | inconclusive | -  | -    | -         | -0.04 [-0.20- 0.11] | 237 | 1189 |
| CIT:MIR | inconclusive | 2  | 322  | 1997-2013 | -0.09 [-0.20- 0.01] | 56  | 1965 |
| CIT:NEF | inconclusive | -  | -    | -         | 0.04 [-0.09- 0.18]  | 275 | 1539 |
| CIT:PAR | conclusive   | 1  | 310  | 2000-2000 | -0.08 [-0.16-0.01]  | -   | -    |
| CIT:REB | inconclusive | 2  | 460  | 2004-2004 | 0.09 [-0.02- 0.20]  | 88  | 1942 |
| CIT:SER | inconclusive | 4  | 811  | 1995-2009 | 0.01 [-0.08- 0.10]  | 400 | 2772 |
| CIT:TRA | inconclusive | -  | -    | -         | -0.06 [-0.18- 0.07] | 237 | 1521 |
| CIT:VEN | inconclusive | 1  | 151  | 2002-2002 | -0.07 [-0.15- 0.02] | 157 | 2679 |
| CIT:VIL | inconclusive | 2  | 1232 | 2010-2013 | 0.05 [-0.07- 0.17]  | 277 | 1713 |
| CIT:VOR | inconclusive | -  | -    | -         | -0.01 [-0.11- 0.10] | 338 | 2108 |
| CLO:DES | inconclusive | -  | -    | -         | 0.13 [-0.03- 0.28]  | 86  | 1337 |
| CLO:DUL | inconclusive | -  | -    | -         | -0.00 [-0.14- 0.13] | 285 | 1462 |
| CLO:ESC | inconclusive | -  | -    | -         | 0.05 [-0.08- 0.18]  | 269 | 1543 |
| CLO:FLO | inconclusive | 3  | 204  | 1987-1989 | 0.12 [-0.01- 0.24]  | 62  | 1708 |
| CLO:FLV | inconclusive | 2  | 83   | 1981-1993 | 0.02 [-0.13- 0.17]  | 265 | 1301 |
| CLO:LEV | inconclusive | -  | -    | -         | 0.09 [-0.10- 0.28]  | 186 | 1051 |
| CLO:MIL | inconclusive | 1  | 107  | 1995-1995 | 0.04 [-0.13- 0.22]  | 205 | 1070 |
| CLO:MIR | inconclusive | -  | -    | -         | -0.01 [-0.15- 0.13] | 274 | 1364 |
| CLO:NEF | inconclusive | -  | -    | -         | 0.13 [-0.04- 0.29]  | 102 | 1218 |
| CLO:PAR | inconclusive | 6  | 1455 | 1987-1995 | 0.00 [-0.12- 0.12]  | 308 | 1716 |
| CLO:REB | conclusive   | -  | -    | -         | 0.18 [ 0.03- 0.33]  | -   | -    |
| CLO:SER | inconclusive | 2  | 272  | 1992-1998 | 0.09 [-0.03- 0.22]  | 156 | 1616 |
| CLO:TRA | inconclusive | -  | -    | -         | 0.03 [-0.13- 0.19]  | 254 | 1211 |
| CLO:VEN | inconclusive | 1  | 102  | 1996-1996 | 0.02 [-0.11- 0.15]  | 293 | 1567 |
| CLO:VIL | inconclusive | -  | -    | -         | 0.14 [-0.03- 0.30]  | 83  | 1247 |
| CLO:VOR | inconclusive | -  | -    | -         | 0.08 [-0.07- 0.22]  | 210 | 1366 |
| DES:DUL | conclusive   | 1  | 474  | 2007-2007 | -0.13 [-0.24-0.02]  | -   | -    |
| DES:ESC | inconclusive | 1  | 388  | 2008-2008 | -0.08 [-0.18- 0.03] | 136 | 1905 |
| DES:FLO | inconclusive | -  | -    | -         | -0.01 [-0.11- 0.10] | 345 | 2186 |
| DES:FLV | inconclusive | -  | -    | -         | -0.11 [-0.25- 0.03] | 89  | 1330 |
| DES:LEV | inconclusive | -  | -    | -         | -0.04 [-0.21- 0.13] | 229 | 1089 |

|         |              |   |      |           |                     |     |      |
|---------|--------------|---|------|-----------|---------------------|-----|------|
| DES:MIL | inconclusive | - | -    | -         | -0.08 [-0.25- 0.09] | 175 | 1051 |
| DES:MIR | conclusive   | - | -    | -         | -0.14 [-0.26-0.01]  | -   | -    |
| DES:NEF | inconclusive | - | -    | -         | 0.00 [-0.14- 0.15]  | 271 | 1327 |
| DES:PAR | conclusive   | - | -    | -         | -0.13 [-0.23-0.02]  | -   | -    |
| DES:REB | inconclusive | - | -    | -         | 0.05 [-0.08- 0.18]  | 269 | 1565 |
| DES:SER | inconclusive | - | -    | -         | -0.03 [-0.14- 0.08] | 305 | 1925 |
| DES:TRA | inconclusive | - | -    | -         | -0.10 [-0.24- 0.04] | 123 | 1268 |
| DES:VEN | inconclusive | - | -    | -         | -0.11 [-0.22-0.00]  | 49  | 1826 |
| DES:VIL | inconclusive | - | -    | -         | 0.01 [-0.13- 0.15]  | 278 | 1391 |
| DES:VOR | inconclusive | - | -    | -         | -0.05 [-0.17- 0.07] | 268 | 1670 |
| DUL:ESC | inconclusive | 4 | 1382 | 2005-2006 | 0.05 [-0.03- 0.13]  | 316 | 2987 |
| DUL:FLO | conclusive   | 2 | 222  | 2000-2001 | 0.12 [ 0.04- 0.20]  | -   | -    |
| DUL:FLV | inconclusive | - | -    | -         | 0.02 [-0.10- 0.14]  | 310 | 1782 |
| DUL:LEV | inconclusive | - | -    | -         | 0.09 [-0.07- 0.25]  | 180 | 1263 |
| DUL:MIL | inconclusive | - | -    | -         | 0.04 [-0.11- 0.20]  | 249 | 1258 |
| DUL:MIR | inconclusive | - | -    | -         | -0.01 [-0.11- 0.10] | 343 | 2164 |
| DUL:NEF | inconclusive | - | -    | -         | 0.13 [-0.00- 0.26]  | 50  | 1577 |
| DUL:PAR | inconclusive | 8 | 2448 | 2001-2012 | 0.00 [-0.07- 0.08]  | 471 | 3546 |
| DUL:REB | conclusive   | - | -    | -         | 0.18 [ 0.06- 0.29]  | -   | -    |
| DUL:SER | conclusive   | - | -    | -         | 0.10 [ 0.01- 0.18]  | -   | -    |
| DUL:TRA | inconclusive | - | -    | -         | 0.03 [-0.10- 0.16]  | 294 | 1635 |
| DUL:VEN | inconclusive | 2 | 836  | 2006-2006 | 0.02 [-0.06- 0.10]  | 407 | 2994 |
| DUL:VIL | conclusive   | - | -    | -         | 0.14 [ 0.01- 0.26]  | -   | -    |
| DUL:VOR | inconclusive | 6 | 2392 | 2008-2014 | 0.08 [-0.02- 0.17]  | 101 | 2425 |
| ESC:FLO | inconclusive | 3 | 783  | 2003-2006 | 0.07 [-0.00- 0.14]  | 52  | 3750 |
| ESC:FLV | inconclusive | - | -    | -         | -0.03 [-0.15- 0.08] | 298 | 1805 |
| ESC:LEV | inconclusive | - | -    | -         | 0.04 [-0.11- 0.20]  | 251 | 1259 |
| ESC:MIL | inconclusive | - | -    | -         | -0.01 [-0.16- 0.15] | 260 | 1245 |
| ESC:MIR | inconclusive | - | -    | -         | -0.06 [-0.16- 0.04] | 252 | 2197 |
| ESC:NEF | inconclusive | - | -    | -         | 0.08 [-0.05- 0.21]  | 201 | 1622 |
| ESC:PAR | inconclusive | 3 | 1145 | 2004-2009 | -0.05 [-0.12- 0.02] | 283 | 3689 |
| ESC:REB | conclusive   | - | -    | -         | 0.13 [ 0.02- 0.24]  | -   | -    |
| ESC:SER | inconclusive | 3 | 629  | 2002-2005 | 0.05 [-0.04- 0.13]  | 323 | 3019 |
| ESC:TRA | inconclusive | - | -    | -         | -0.02 [-0.14- 0.10] | 293 | 1642 |
| ESC:VEN | inconclusive | 2 | 495  | 2002-2002 | -0.03 [-0.11- 0.05] | 386 | 3148 |
| ESC:VIL | inconclusive | - | -    | -         | 0.09 [-0.04- 0.21]  | 158 | 1731 |
| ESC:VOR | inconclusive | - | -    | -         | 0.03 [-0.07- 0.13]  | 341 | 2314 |
| FLO:FLV | inconclusive | 2 | 284  | 1994-2001 | -0.10 [-0.21- 0.00] | 51  | 1853 |
| FLO:LEV | inconclusive | - | -    | -         | -0.03 [-0.18- 0.12] | 254 | 1253 |
| FLO:MIL | inconclusive | 1 | 300  | 1996-1996 | -0.08 [-0.22- 0.07] | 180 | 1245 |
| FLO:MIR | conclusive   | 4 | 579  | 1996-2003 | -0.13 [-0.22-0.04]  | -   | -    |
| FLO:NEF | inconclusive | 3 | 161  | 1995-1995 | 0.01 [-0.11- 0.13]  | 308 | 1722 |

|         |              |    |      |           |                     |     |      |
|---------|--------------|----|------|-----------|---------------------|-----|------|
| FLO:PAR | conclusive   | 12 | 2754 | 1991-2000 | -0.12 [-0.18-0.06]  | -   | -    |
| FLO:REB | inconclusive | 4  | 806  | 1995-2001 | 0.06 [-0.04- 0.16]  | 280 | 2290 |
| FLO:SER | inconclusive | 7  | 1328 | 1990-2010 | -0.02 [-0.09- 0.05] | 414 | 3711 |
| FLO:TRA | inconclusive | 3  | 284  | 1987-2010 | -0.09 [-0.21- 0.02] | 90  | 1689 |
| FLO:VEN | conclusive   | 13 | 3253 | 1992-2013 | -0.10 [-0.17-0.04]  | -   | -    |
| FLO:VIL | inconclusive | 1  | 196  | 2010-2010 | 0.02 [-0.10- 0.13]  | 314 | 1826 |
| FLO:VOR | inconclusive | -  | -    | -         | -0.04 [-0.13- 0.05] | 318 | 2510 |
| FLV:LEV | inconclusive | -  | -    | -         | 0.07 [-0.10- 0.25]  | 209 | 1122 |
| FLV:MIL | inconclusive | 2  | 239  | 1989-1999 | 0.03 [-0.14- 0.19]  | 254 | 1198 |
| FLV:MIR | inconclusive | 2  | 412  | 2000-2000 | -0.03 [-0.15- 0.10] | 295 | 1689 |
| FLV:NEF | inconclusive | -  | -    | -         | 0.11 [-0.04- 0.26]  | 120 | 1337 |
| FLV:PAR | inconclusive | 2  | 180  | 1992-1995 | -0.02 [-0.12- 0.09] | 332 | 2078 |
| FLV:REB | conclusive   | -  | -    | -         | 0.16 [ 0.02- 0.30]  | -   | -    |
| FLV:SER | inconclusive | 2  | 185  | 1993-2003 | 0.08 [-0.03- 0.19]  | 170 | 1919 |
| FLV:TRA | inconclusive | -  | -    | -         | 0.01 [-0.13- 0.16]  | 273 | 1342 |
| FLV:VEN | inconclusive | 1  | 111  | 1996-1996 | 0.00 [-0.11- 0.11]  | 325 | 1926 |
| FLV:VIL | inconclusive | -  | -    | -         | 0.12 [-0.03- 0.27]  | 93  | 1383 |
| FLV:VOR | inconclusive | -  | -    | -         | 0.06 [-0.07- 0.19]  | 250 | 1595 |
| LEV:MIL | inconclusive | -  | -    | -         | -0.05 [-0.25- 0.15] | 188 | 894  |
| LEV:MIR | inconclusive | -  | -    | -         | -0.10 [-0.26- 0.07] | 147 | 1069 |
| LEV:NEF | inconclusive | -  | -    | -         | 0.04 [-0.15- 0.22]  | 226 | 1048 |
| LEV:PAR | inconclusive | -  | -    | -         | -0.09 [-0.24- 0.06] | 163 | 1197 |
| LEV:REB | inconclusive | -  | -    | -         | 0.09 [-0.09- 0.26]  | 197 | 1150 |
| LEV:SER | inconclusive | -  | -    | -         | 0.00 [-0.15- 0.16]  | 259 | 1228 |
| LEV:TRA | inconclusive | -  | -    | -         | -0.06 [-0.24- 0.12] | 194 | 1001 |
| LEV:VEN | inconclusive | -  | -    | -         | -0.07 [-0.23- 0.08] | 201 | 1180 |
| LEV:VIL | inconclusive | -  | -    | -         | 0.04 [-0.14- 0.22]  | 227 | 1076 |
| LEV:VOR | inconclusive | -  | -    | -         | -0.01 [-0.18- 0.15] | 246 | 1151 |
| MIL:MIR | inconclusive | -  | -    | -         | -0.05 [-0.21- 0.11] | 225 | 1146 |
| MIL:NEF | inconclusive | -  | -    | -         | 0.09 [-0.10- 0.27]  | 193 | 1083 |
| MIL:PAR | inconclusive | 2  | 1207 | 2002-2011 | -0.04 [-0.18- 0.10] | 250 | 1319 |
| MIL:REB | inconclusive | -  | -    | -         | 0.13 [-0.04- 0.30]  | 97  | 1183 |
| MIL:SER | inconclusive | -  | -    | -         | 0.05 [-0.10- 0.21]  | 248 | 1291 |
| MIL:TRA | inconclusive | -  | -    | -         | -0.01 [-0.19- 0.16] | 230 | 1054 |
| MIL:VEN | inconclusive | -  | -    | -         | -0.02 [-0.18- 0.13] | 256 | 1249 |
| MIL:VIL | inconclusive | -  | -    | -         | 0.09 [-0.09- 0.27]  | 184 | 1104 |
| MIL:VOR | inconclusive | -  | -    | -         | 0.03 [-0.13- 0.20]  | 244 | 1173 |
| MIR:NEF | inconclusive | -  | -    | -         | 0.14 [-0.00- 0.28]  | 53  | 1470 |
| MIR:PAR | inconclusive | 4  | 719  | 1996-2007 | 0.01 [-0.08- 0.10]  | 397 | 2739 |
| MIR:REB | conclusive   | -  | -    | -         | 0.19 [ 0.06- 0.31]  | -   | -    |
| MIR:SER | conclusive   | -  | -    | -         | 0.10 [ 0.01- 0.20]  | -   | -    |
| MIR:TRA | inconclusive | 2  | 300  | 1993-1995 | 0.04 [-0.09- 0.17]  | 294 | 1594 |

|         |              |   |      |           |                     |     |      |
|---------|--------------|---|------|-----------|---------------------|-----|------|
| MIR:VEN | inconclusive | 2 | 533  | 2004-2004 | 0.03 [-0.07- 0.12]  | 355 | 2487 |
| MIR:VIL | conclusive   | - | -    | -         | 0.14 [ 0.01- 0.28]  | -   | -    |
| MIR:VOR | inconclusive | - | -    | -         | 0.08 [-0.03- 0.20]  | 135 | 1871 |
| NEF:PAR | conclusive   | 2 | 246  | 1994-2000 | -0.13 [-0.25-0.01]  | -   | -    |
| NEF:REB | inconclusive | - | -    | -         | 0.05 [-0.10- 0.20]  | 255 | 1347 |
| NEF:SER | inconclusive | 1 | 160  | 1994-1994 | -0.03 [-0.16- 0.09] | 278 | 1557 |
| NEF:TRA | inconclusive | - | -    | -         | -0.10 [-0.26- 0.06] | 134 | 1129 |
| NEF:VEN | inconclusive | - | -    | -         | -0.11 [-0.24- 0.02] | 76  | 1447 |
| NEF:VIL | inconclusive | - | -    | -         | 0.01 [-0.15- 0.16]  | 258 | 1223 |
| NEF:VOR | inconclusive | - | -    | -         | -0.05 [-0.19- 0.09] | 247 | 1378 |
| PAR:REB | conclusive   | 3 | 1375 | 2000-2004 | 0.18 [ 0.08- 0.28]  | -   | -    |
| PAR:SER | conclusive   | 2 | 545  | 1998-2000 | 0.09 [ 0.02- 0.17]  | -   | -    |
| PAR:TRA | inconclusive | 2 | 333  | 1998-2003 | 0.03 [-0.09- 0.14]  | 312 | 1882 |
| PAR:VEN | inconclusive | 2 | 607  | 1995-1996 | 0.02 [-0.05- 0.08]  | 485 | 4190 |
| PAR:VIL | conclusive   | - | -    | -         | 0.13 [ 0.02- 0.25]  | -   | -    |
| PAR:VOR | inconclusive | 1 | 88   | 2014-2014 | 0.08 [-0.02- 0.17]  | 106 | 2579 |
| REB:SER | inconclusive | - | -    | -         | -0.08 [-0.19- 0.03] | 128 | 1801 |
| REB:TRA | conclusive   | - | -    | -         | -0.15 [-0.29-0.00]  | -   | -    |
| REB:VEN | conclusive   | 1 | 167  | 2000-2000 | -0.16 [-0.27-0.05]  | -   | -    |
| REB:VIL | inconclusive | - | -    | -         | -0.04 [-0.18- 0.10] | 254 | 1330 |
| REB:VOR | inconclusive | - | -    | -         | -0.10 [-0.22- 0.02] | 96  | 1567 |
| SER:TRA | inconclusive | 2 | 250  | 2004-2010 | -0.07 [-0.19- 0.05] | 204 | 1609 |
| SER:VEN | inconclusive | 2 | 323  | 2003-2004 | -0.08 [-0.16- 0.00] | 66  | 2940 |
| SER:VIL | inconclusive | - | -    | -         | 0.04 [-0.08- 0.16]  | 285 | 1686 |
| SER:VOR | inconclusive | - | -    | -         | -0.02 [-0.12- 0.08] | 344 | 2230 |
| TRA:VEN | inconclusive | 1 | 153  | 1994-1994 | -0.01 [-0.13- 0.11] | 307 | 1718 |
| TRA:VIL | inconclusive | - | -    | -         | 0.11 [-0.05- 0.26]  | 127 | 1310 |
| TRA:VOR | inconclusive | - | -    | -         | 0.05 [-0.09- 0.18]  | 258 | 1480 |
| VEN:VIL | inconclusive | - | -    | -         | 0.12 [-0.00- 0.24]  | 56  | 1746 |
| VEN:VOR | inconclusive | 2 | 767  | 2007-2013 | 0.06 [-0.04- 0.15]  | 274 | 2456 |
| VIL:VOR | inconclusive | - | -    | -         | -0.06 [-0.19- 0.07] | 240 | 1438 |

---

**Table 2b: Main analysis tolerability.** Listed are network characteristics for each of the 231 comparisons regarding the conclusiveness of evidence (conclusive or inconclusive), the number of trials, sample size, study year range of completion (only for direct comparisons), and network effect estimates with 95% confidence intervals on the odds ratio (OR [95%CI]) scale. Listed are results of the conditional power analysis in terms of the sample size at 20% and 80% conditional power ( $N_{CP=20\%}$ ,  $N_{CP=80\%}$ ). Results are shown based on the main analysis considering a trial design ratio of  $r = 1/0$ , anticipated alternative effect sizes equal to the network estimates ( $f_{xyN}$ ), and anticipated event probabilities equal to the average network event probability ( $p_{cN}$ ).

|         | Network      |        |        |            | Conditional power |               |               |
|---------|--------------|--------|--------|------------|-------------------|---------------|---------------|
|         | Evidence     | Trials | Sample | Year range | OR [95%CI]        | $N_{CP=20\%}$ | $N_{CP=80\%}$ |
| PLA:AGO | inconclusive | 13     | 4173   | 1999-2011  | 1.13 [0.92-1.39]  | 264           | 1065          |
| PLA:AMI | conclusive   | 22     | 2473   | 1977-1995  | 2.71 [2.32-3.17]  | -             | -             |
| PLA:BUP | conclusive   | 21     | 5220   | 1980-2012  | 1.70 [1.38-2.08]  | -             | -             |
| PLA:CIT | conclusive   | 11     | 3266   | 1992-2013  | 1.75 [1.42-2.16]  | -             | -             |
| PLA:CLO | conclusive   | 1      | 38     | 1987-1987  | 3.45 [2.62-4.53]  | -             | -             |
| PLA:DES | conclusive   | 13     | 5604   | 2004-2012  | 1.81 [1.40-2.33]  | -             | -             |
| PLA:DUL | conclusive   | 20     | 5800   | 2000-2014  | 2.24 [1.90-2.64]  | -             | -             |
| PLA:ESC | conclusive   | 21     | 6432   | 2000-2010  | 1.56 [1.29-1.88]  | -             | -             |
| PLA:FLO | conclusive   | 33     | 7724   | 1983-2014  | 1.56 [1.38-1.77]  | -             | -             |
| PLA:FLV | conclusive   | 12     | 1408   | 1981-1994  | 2.42 [1.91-3.07]  | -             | -             |
| PLA:LEV | conclusive   | 6      | 2837   | 2007-2012  | 2.24 [1.54-3.26]  | -             | -             |
| PLA:MIL | conclusive   | -      | -      | -          | 1.53 [1.12-2.11]  | -             | -             |
| PLA:MIR | conclusive   | 12     | 1717   | 1985-2007  | 1.89 [1.56-2.29]  | -             | -             |
| PLA:NEF | conclusive   | 9      | 1362   | 1990-1996  | 1.94 [1.44-2.62]  | -             | -             |
| PLA:PAR | conclusive   | 52     | 10405  | 1984-2010  | 1.99 [1.77-2.23]  | -             | -             |
| PLA:REB | conclusive   | 11     | 2612   | 1991-2001  | 2.38 [1.90-2.99]  | -             | -             |
| PLA:SER | conclusive   | 16     | 3834   | 1989-2013  | 2.21 [1.86-2.64]  | -             | -             |
| PLA:TRA | conclusive   | 5      | 1065   | 1977-2013  | 2.57 [1.92-3.44]  | -             | -             |
| PLA:VEN | conclusive   | 24     | 6083   | 1991-2014  | 2.21 [1.94-2.52]  | -             | -             |
| PLA:VIL | conclusive   | 6      | 2895   | 2007-2013  | 2.20 [1.58-3.06]  | -             | -             |
| PLA:VOR | conclusive   | 15     | 6820   | 2007-2017  | 1.48 [1.20-1.82]  | -             | -             |
| AGO:AMI | conclusive   | -      | -      | -          | 2.40 [1.88-3.07]  | -             | -             |
| AGO:BUP | conclusive   | -      | -      | -          | 1.50 [1.13-1.99]  | -             | -             |
| AGO:CIT | conclusive   | -      | -      | -          | 1.55 [1.17-2.06]  | -             | -             |
| AGO:CLO | conclusive   | -      | -      | -          | 3.05 [2.20-4.24]  | -             | -             |
| AGO:DES | conclusive   | -      | -      | -          | 1.60 [1.16-2.21]  | -             | -             |
| AGO:DUL | conclusive   | 1      | 418    | 2008-2008  | 1.98 [1.55-2.54]  | -             | -             |
| AGO:ESC | conclusive   | 2      | 462    | 2006-2008  | 1.38 [1.06-1.80]  | -             | -             |
| AGO:FLO | conclusive   | 4      | 1862   | 1999-2012  | 1.38 [1.11-1.71]  | -             | -             |
| AGO:FLV | conclusive   | -      | -      | -          | 2.14 [1.58-2.91]  | -             | -             |
| AGO:LEV | conclusive   | -      | -      | -          | 1.99 [1.30-3.04]  | -             | -             |
| AGO:MIL | inconclusive | -      | -      | -          | 1.36 [0.94-1.96]  | 97            | 805           |

|         |              |    |      |           |                  |     |      |
|---------|--------------|----|------|-----------|------------------|-----|------|
| AGO:MIR | conclusive   | -  | -    | -         | 1.67 [1.28-2.19] | -   | -    |
| AGO:NEF | conclusive   | -  | -    | -         | 1.72 [1.20-2.45] | -   | -    |
| AGO:PAR | conclusive   | 5  | 1648 | 1999-2008 | 1.76 [1.42-2.18] | -   | -    |
| AGO:REB | conclusive   | -  | -    | -         | 2.11 [1.57-2.83] | -   | -    |
| AGO:SER | conclusive   | -  | -    | -         | 1.96 [1.51-2.54] | -   | -    |
| AGO:TRA | conclusive   | -  | -    | -         | 2.27 [1.61-3.22] | -   | -    |
| AGO:VEN | conclusive   | 2  | 609  | 2002-2002 | 1.96 [1.56-2.45] | -   | -    |
| AGO:VIL | conclusive   | -  | -    | -         | 1.95 [1.32-2.86] | -   | -    |
| AGO:VOR | inconclusive | -  | -    | -         | 1.31 [0.99-1.74] | 63  | 858  |
| AMI:BUP | conclusive   | 1  | 118  | 1981-1981 | 0.62 [0.49-0.80] | -   | -    |
| AMI:CIT | conclusive   | 2  | 409  | 1984-1996 | 0.65 [0.51-0.82] | -   | -    |
| AMI:CLO | inconclusive | -  | -    | -         | 1.27 [0.94-1.71] | 111 | 877  |
| AMI:DES | conclusive   | -  | -    | -         | 0.67 [0.49-0.89] | -   | -    |
| AMI:DUL | inconclusive | -  | -    | -         | 0.82 [0.66-1.03] | 79  | 868  |
| AMI:ESC | conclusive   | -  | -    | -         | 0.57 [0.46-0.72] | -   | -    |
| AMI:FLO | conclusive   | 13 | 859  | 1983-1997 | 0.57 [0.48-0.68] | -   | -    |
| AMI:FLV | inconclusive | 3  | 337  | 1989-1996 | 0.89 [0.69-1.16] | 196 | 806  |
| AMI:LEV | inconclusive | -  | -    | -         | 0.83 [0.55-1.24] | 158 | 635  |
| AMI:MIL | conclusive   | 1  | 87   | 1987-1987 | 0.57 [0.40-0.79] | -   | -    |
| AMI:MIR | conclusive   | 7  | 865  | 1988-1995 | 0.70 [0.56-0.87] | -   | -    |
| AMI:NEF | conclusive   | 1  | 106  | 1992-1992 | 0.71 [0.51-0.99] | -   | -    |
| AMI:PAR | conclusive   | 19 | 2001 | 1983-2000 | 0.73 [0.62-0.86] | -   | -    |
| AMI:REB | inconclusive | -  | -    | -         | 0.88 [0.67-1.14] | 220 | 807  |
| AMI:SER | conclusive   | 7  | 1432 | 1988-1998 | 0.82 [0.67-0.99] | -   | -    |
| AMI:TRA | inconclusive | 2  | 229  | 1986-1987 | 0.95 [0.69-1.29] | 243 | 766  |
| AMI:VEN | conclusive   | 2  | 272  | 1998-2001 | 0.82 [0.68-0.98] | -   | -    |
| AMI:VIL | inconclusive | -  | -    | -         | 0.81 [0.57-1.16] | 150 | 664  |
| AMI:VOR | conclusive   | -  | -    | -         | 0.55 [0.42-0.70] | -   | -    |
| BUP:CIT | inconclusive | -  | -    | -         | 1.03 [0.78-1.38] | 269 | 833  |
| BUP:CLO | conclusive   | -  | -    | -         | 2.03 [1.46-2.84] | -   | -    |
| BUP:DES | inconclusive | -  | -    | -         | 1.07 [0.77-1.47] | 250 | 789  |
| BUP:DUL | conclusive   | -  | -    | -         | 1.32 [1.02-1.71] | -   | -    |
| BUP:ESC | inconclusive | 2  | 566  | 2004-2004 | 0.92 [0.70-1.20] | 253 | 822  |
| BUP:FLO | inconclusive | 2  | 617  | 1995-2000 | 0.92 [0.73-1.16] | 270 | 897  |
| BUP:FLV | conclusive   | -  | -    | -         | 1.43 [1.05-1.94] | -   | -    |
| BUP:LEV | inconclusive | -  | -    | -         | 1.32 [0.87-2.02] | 151 | 745  |
| BUP:MIL | inconclusive | -  | -    | -         | 0.91 [0.62-1.31] | 207 | 692  |
| BUP:MIR | inconclusive | -  | -    | -         | 1.11 [0.85-1.46] | 258 | 878  |
| BUP:NEF | inconclusive | -  | -    | -         | 1.14 [0.80-1.64] | 225 | 769  |
| BUP:PAR | inconclusive | 2  | 218  | 2001-2009 | 1.17 [0.94-1.47] | 255 | 1003 |
| BUP:REB | conclusive   | -  | -    | -         | 1.40 [1.04-1.90] | -   | -    |
| BUP:SER | conclusive   | 2  | 479  | 1998-1998 | 1.31 [1.01-1.69] | -   | -    |

|         |              |   |      |           |                  |     |     |
|---------|--------------|---|------|-----------|------------------|-----|-----|
| BUP:TRA | conclusive   | 1 | 124  | 1992-1992 | 1.52 [1.08-2.12] | -   | -   |
| BUP:VEN | conclusive   | 2 | 725  | 2004-2005 | 1.31 [1.04-1.64] | -   | -   |
| BUP:VIL | inconclusive | - | -    | -         | 1.30 [0.88-1.91] | 153 | 773 |
| BUP:VOR | inconclusive | - | -    | -         | 0.87 [0.66-1.17] | 220 | 793 |
| CIT:CLO | conclusive   | 1 | 114  | 1984-1984 | 1.97 [1.41-2.74] | -   | -   |
| CIT:DES | inconclusive | - | -    | -         | 1.03 [0.74-1.43] | 251 | 777 |
| CIT:DUL | inconclusive | - | -    | -         | 1.28 [0.99-1.65] | 63  | 944 |
| CIT:ESC | inconclusive | 8 | 1750 | 2000-2008 | 0.89 [0.69-1.15] | 195 | 819 |
| CIT:FLO | inconclusive | 2 | 673  | 1994-1995 | 0.89 [0.71-1.11] | 203 | 876 |
| CIT:FLV | conclusive   | 1 | 217  | 1991-1991 | 1.38 [1.03-1.85] | -   | -   |
| CIT:LEV | inconclusive | - | -    | -         | 1.28 [0.84-1.96] | 171 | 737 |
| CIT:MIL | inconclusive | - | -    | -         | 0.88 [0.61-1.27] | 194 | 684 |
| CIT:MIR | inconclusive | 1 | 270  | 1997-1997 | 1.08 [0.82-1.41] | 246 | 861 |
| CIT:NEF | inconclusive | - | -    | -         | 1.11 [0.77-1.58] | 232 | 760 |
| CIT:PAR | inconclusive | 1 | 310  | 2000-2000 | 1.13 [0.91-1.42] | 256 | 990 |
| CIT:REB | conclusive   | 1 | 101  | 2004-2004 | 1.36 [1.01-1.83] | -   | -   |
| CIT:SER | inconclusive | 2 | 360  | 1998-2002 | 1.26 [0.98-1.63] | 68  | 951 |
| CIT:TRA | conclusive   | - | -    | -         | 1.47 [1.03-2.08] | -   | -   |
| CIT:VEN | conclusive   | 1 | 53   | 2013-2013 | 1.26 [1.00-1.59] | -   | -   |
| CIT:VIL | inconclusive | 1 | 872  | 2013-2013 | 1.26 [0.88-1.79] | 171 | 796 |
| CIT:VOR | inconclusive | - | -    | -         | 0.85 [0.63-1.13] | 189 | 783 |
| CLO:DES | conclusive   | - | -    | -         | 0.52 [0.36-0.76] | -   | -   |
| CLO:DUL | conclusive   | - | -    | -         | 0.65 [0.48-0.89] | -   | -   |
| CLO:ESC | conclusive   | - | -    | -         | 0.45 [0.33-0.62] | -   | -   |
| CLO:FLO | conclusive   | 2 | 263  | 1987-1989 | 0.45 [0.34-0.60] | -   | -   |
| CLO:FLV | conclusive   | 2 | 83   | 1981-1993 | 0.70 [0.50-0.99] | -   | -   |
| CLO:LEV | inconclusive | - | -    | -         | 0.65 [0.41-1.03] | 70  | 526 |
| CLO:MIL | conclusive   | 1 | 107  | 1995-1995 | 0.45 [0.30-0.66] | -   | -   |
| CLO:MIR | conclusive   | - | -    | -         | 0.55 [0.40-0.75] | -   | -   |
| CLO:NEF | conclusive   | - | -    | -         | 0.56 [0.38-0.84] | -   | -   |
| CLO:PAR | conclusive   | 6 | 1455 | 1987-1995 | 0.58 [0.44-0.75] | -   | -   |
| CLO:REB | conclusive   | - | -    | -         | 0.69 [0.49-0.97] | -   | -   |
| CLO:SER | conclusive   | 2 | 272  | 1992-1998 | 0.64 [0.47-0.87] | -   | -   |
| CLO:TRA | inconclusive | - | -    | -         | 0.75 [0.51-1.10] | 102 | 611 |
| CLO:VEN | conclusive   | 2 | 223  | 1991-1996 | 0.64 [0.48-0.85] | -   | -   |
| CLO:VIL | conclusive   | - | -    | -         | 0.64 [0.42-0.98] | -   | -   |
| CLO:VOR | conclusive   | - | -    | -         | 0.43 [0.31-0.60] | -   | -   |
| DES:DUL | inconclusive | 1 | 474  | 2007-2007 | 1.24 [0.93-1.66] | 146 | 878 |
| DES:ESC | inconclusive | - | -    | -         | 0.86 [0.63-1.18] | 200 | 735 |
| DES:FLO | inconclusive | - | -    | -         | 0.86 [0.65-1.14] | 203 | 776 |
| DES:FLV | inconclusive | - | -    | -         | 1.34 [0.95-1.89] | 93  | 825 |
| DES:LEV | inconclusive | - | -    | -         | 1.24 [0.79-1.95] | 183 | 713 |



|         |              |   |      |           |                  |     |      |
|---------|--------------|---|------|-----------|------------------|-----|------|
| DES:MIL | inconclusive | - | -    | -         | 0.85 [0.57-1.27] | 171 | 643  |
| DES:MIR | inconclusive | - | -    | -         | 1.05 [0.76-1.44] | 254 | 792  |
| DES:NEF | inconclusive | - | -    | -         | 1.07 [0.73-1.59] | 224 | 724  |
| DES:PAR | inconclusive | - | -    | -         | 1.10 [0.84-1.45] | 262 | 869  |
| DES:REB | inconclusive | - | -    | -         | 1.32 [0.94-1.85] | 105 | 829  |
| DES:SER | inconclusive | - | -    | -         | 1.23 [0.90-1.67] | 175 | 854  |
| DES:TRA | inconclusive | - | -    | -         | 1.42 [0.97-2.09] | 75  | 796  |
| DES:VEN | inconclusive | - | -    | -         | 1.23 [0.92-1.63] | 157 | 890  |
| DES:VIL | inconclusive | - | -    | -         | 1.22 [0.80-1.85] | 193 | 734  |
| DES:VOR | inconclusive | - | -    | -         | 0.82 [0.59-1.13] | 165 | 733  |
| DUL:ESC | conclusive   | 3 | 1120 | 2005-2005 | 0.70 [0.55-0.88] | -   | -    |
| DUL:FLO | conclusive   | 1 | 103  | 2000-2000 | 0.70 [0.57-0.85] | -   | -    |
| DUL:FLV | inconclusive | - | -    | -         | 1.08 [0.81-1.44] | 264 | 850  |
| DUL:LEV | inconclusive | - | -    | -         | 1.00 [0.67-1.51] | 215 | 693  |
| DUL:MIL | conclusive   | - | -    | -         | 0.69 [0.48-0.97] | -   | -    |
| DUL:MIR | inconclusive | - | -    | -         | 0.84 [0.66-1.08] | 158 | 824  |
| DUL:NEF | inconclusive | - | -    | -         | 0.87 [0.62-1.22] | 197 | 708  |
| DUL:PAR | inconclusive | 7 | 2167 | 2001-2010 | 0.89 [0.74-1.07] | 212 | 992  |
| DUL:REB | inconclusive | - | -    | -         | 1.06 [0.81-1.40] | 271 | 860  |
| DUL:SER | inconclusive | - | -    | -         | 0.99 [0.78-1.25] | 295 | 919  |
| DUL:TRA | inconclusive | - | -    | -         | 1.15 [0.83-1.60] | 230 | 803  |
| DUL:VEN | inconclusive | 2 | 836  | 2006-2006 | 0.99 [0.82-1.20] | 316 | 1014 |
| DUL:VIL | inconclusive | - | -    | -         | 0.98 [0.68-1.42] | 229 | 722  |
| DUL:VOR | conclusive   | 6 | 2392 | 2008-2014 | 0.66 [0.53-0.83] | -   | -    |
| ESC:FLO | inconclusive | 4 | 813  | 2003-2006 | 1.00 [0.81-1.23] | 312 | 982  |
| ESC:FLV | conclusive   | - | -    | -         | 1.55 [1.16-2.08] | -   | -    |
| ESC:LEV | inconclusive | - | -    | -         | 1.44 [0.95-2.18] | 87  | 769  |
| ESC:MIL | inconclusive | - | -    | -         | 0.98 [0.69-1.41] | 232 | 728  |
| ESC:MIR | inconclusive | - | -    | -         | 1.21 [0.94-1.57] | 153 | 929  |
| ESC:NEF | inconclusive | - | -    | -         | 1.24 [0.88-1.76] | 178 | 801  |
| ESC:PAR | conclusive   | 2 | 686  | 2004-2009 | 1.27 [1.04-1.57] | -   | -    |
| ESC:REB | conclusive   | - | -    | -         | 1.53 [1.15-2.04] | -   | -    |
| ESC:SER | conclusive   | 3 | 629  | 2002-2005 | 1.42 [1.11-1.81] | -   | -    |
| ESC:TRA | conclusive   | - | -    | -         | 1.65 [1.17-2.31] | -   | -    |
| ESC:VEN | conclusive   | 2 | 495  | 2002-2002 | 1.42 [1.15-1.76] | -   | -    |
| ESC:VIL | inconclusive | - | -    | -         | 1.41 [0.97-2.05] | 74  | 806  |
| ESC:VOR | inconclusive | - | -    | -         | 0.95 [0.72-1.25] | 267 | 835  |
| FLO:FLV | conclusive   | 1 | 100  | 1994-1994 | 1.55 [1.20-2.01] | -   | -    |
| FLO:LEV | inconclusive | - | -    | -         | 1.44 [0.97-2.13] | 73  | 791  |
| FLO:MIL | inconclusive | 2 | 490  | 1992-1996 | 0.98 [0.71-1.36] | 243 | 765  |
| FLO:MIR | inconclusive | 6 | 1035 | 1996-2003 | 1.21 [0.99-1.49] | 60  | 1049 |
| FLO:NEF | inconclusive | 3 | 161  | 1995-1995 | 1.24 [0.91-1.71] | 140 | 838  |

|         |              |    |      |           |                  |     |      |
|---------|--------------|----|------|-----------|------------------|-----|------|
| FLO:PAR | conclusive   | 11 | 2512 | 1991-2000 | 1.27 [1.11-1.46] | -   | -    |
| FLO:REB | conclusive   | 4  | 806  | 1995-2001 | 1.53 [1.20-1.94] | -   | -    |
| FLO:SER | conclusive   | 3  | 532  | 1991-2000 | 1.42 [1.17-1.72] | -   | -    |
| FLO:TRA | conclusive   | 3  | 196  | 1986-1989 | 1.65 [1.22-2.23] | -   | -    |
| FLO:VEN | conclusive   | 15 | 3138 | 1992-2007 | 1.42 [1.23-1.64] | -   | -    |
| FLO:VIL | inconclusive | -  | -    | -         | 1.41 [0.99-2.00] | 59  | 834  |
| FLO:VOR | inconclusive | -  | -    | -         | 0.95 [0.75-1.20] | 285 | 905  |
| FLV:LEV | inconclusive | -  | -    | -         | 0.93 [0.60-1.44] | 188 | 645  |
| FLV:MIL | conclusive   | 2  | 239  | 1989-1999 | 0.63 [0.43-0.92] | -   | -    |
| FLV:MIR | inconclusive | 2  | 412  | 2000-2000 | 0.78 [0.59-1.03] | 125 | 741  |
| FLV:NEF | inconclusive | -  | -    | -         | 0.80 [0.55-1.17] | 143 | 645  |
| FLV:PAR | inconclusive | 2  | 180  | 1992-1995 | 0.82 [0.64-1.05] | 78  | 791  |
| FLV:REB | inconclusive | -  | -    | -         | 0.98 [0.71-1.36] | 249 | 768  |
| FLV:SER | inconclusive | 2  | 185  | 1993-2003 | 0.91 [0.69-1.21] | 203 | 779  |
| FLV:TRA | inconclusive | -  | -    | -         | 1.06 [0.73-1.53] | 233 | 742  |
| FLV:VEN | inconclusive | 1  | 92   | 2001-2001 | 0.91 [0.71-1.19] | 242 | 828  |
| FLV:VIL | inconclusive | -  | -    | -         | 0.91 [0.61-1.36] | 198 | 670  |
| FLV:VOR | conclusive   | -  | -    | -         | 0.61 [0.45-0.84] | -   | -    |
| LEV:MIL | inconclusive | -  | -    | -         | 0.68 [0.42-1.12] | 83  | 521  |
| LEV:MIR | inconclusive | -  | -    | -         | 0.84 [0.55-1.28] | 163 | 630  |
| LEV:NEF | inconclusive | -  | -    | -         | 0.86 [0.54-1.39] | 155 | 595  |
| LEV:PAR | inconclusive | -  | -    | -         | 0.89 [0.60-1.31] | 193 | 671  |
| LEV:REB | inconclusive | -  | -    | -         | 1.06 [0.69-1.64] | 208 | 687  |
| LEV:SER | inconclusive | -  | -    | -         | 0.99 [0.65-1.49] | 212 | 687  |
| LEV:TRA | inconclusive | -  | -    | -         | 1.14 [0.71-1.84] | 194 | 681  |
| LEV:VEN | inconclusive | -  | -    | -         | 0.99 [0.66-1.46] | 219 | 700  |
| LEV:VIL | inconclusive | -  | -    | -         | 0.98 [0.60-1.61] | 177 | 623  |
| LEV:VOR | inconclusive | -  | -    | -         | 0.66 [0.43-1.01] | 69  | 604  |
| MIL:MIR | inconclusive | -  | -    | -         | 1.23 [0.86-1.76] | 188 | 789  |
| MIL:NEF | inconclusive | -  | -    | -         | 1.26 [0.82-1.94] | 178 | 731  |
| MIL:PAR | inconclusive | 2  | 1207 | 2002-2011 | 1.30 [0.95-1.76] | 89  | 861  |
| MIL:REB | conclusive   | -  | -    | -         | 1.55 [1.06-2.27] | -   | -    |
| MIL:SER | conclusive   | -  | -    | -         | 1.44 [1.02-2.05] | -   | -    |
| MIL:TRA | conclusive   | -  | -    | -         | 1.67 [1.10-2.55] | -   | -    |
| MIL:VEN | conclusive   | -  | -    | -         | 1.44 [1.04-2.01] | -   | -    |
| MIL:VIL | inconclusive | -  | -    | -         | 1.43 [0.91-2.26] | 110 | 739  |
| MIL:VOR | inconclusive | -  | -    | -         | 0.97 [0.66-1.41] | 225 | 714  |
| MIR:NEF | inconclusive | -  | -    | -         | 1.03 [0.72-1.46] | 240 | 750  |
| MIR:PAR | inconclusive | 4  | 719  | 1996-2007 | 1.05 [0.86-1.29] | 306 | 1017 |
| MIR:REB | inconclusive | -  | -    | -         | 1.26 [0.94-1.68] | 113 | 889  |
| MIR:SER | inconclusive | 1  | 346  | 2001-2001 | 1.17 [0.92-1.49] | 298 | 954  |
| MIR:TRA | inconclusive | 2  | 300  | 1993-1995 | 1.36 [0.98-1.90] | 40  | 792  |

|         |              |   |      |           |                  |     |      |
|---------|--------------|---|------|-----------|------------------|-----|------|
| MIR:VEN | inconclusive | 2 | 533  | 2004-2004 | 1.17 [0.95-1.44] | 115 | 1026 |
| MIR:VIL | inconclusive | - | -    | -         | 1.16 [0.80-1.70] | 215 | 755  |
| MIR:VOR | inconclusive | - | -    | -         | 0.78 [0.59-1.04] | 82  | 781  |
| NEF:PAR | inconclusive | 2 | 246  | 1994-2000 | 1.03 [0.75-1.40] | 258 | 794  |
| NEF:REB | inconclusive | - | -    | -         | 1.23 [0.85-1.78] | 191 | 775  |
| NEF:SER | inconclusive | 1 | 160  | 1994-1994 | 1.14 [0.82-1.59] | 251 | 800  |
| NEF:TRA | inconclusive | - | -    | -         | 1.33 [0.88-2.00] | 146 | 754  |
| NEF:VEN | inconclusive | - | -    | -         | 1.14 [0.83-1.57] | 234 | 813  |
| NEF:VIL | inconclusive | - | -    | -         | 1.14 [0.73-1.77] | 203 | 698  |
| NEF:VOR | inconclusive | - | -    | -         | 0.76 [0.53-1.10] | 116 | 679  |
| PAR:REB | inconclusive | 3 | 1375 | 2000-2004 | 1.20 [0.95-1.51] | 49  | 899  |
| PAR:SER | inconclusive | 1 | 192  | 2000-2000 | 1.11 [0.92-1.35] | 282 | 1081 |
| PAR:TRA | inconclusive | 2 | 333  | 1998-2003 | 1.29 [0.96-1.74] | 68  | 868  |
| PAR:VEN | inconclusive | 5 | 1134 | 1995-2001 | 1.11 [0.96-1.29] | 251 | 1246 |
| PAR:VIL | inconclusive | - | -    | -         | 1.11 [0.78-1.56] | 237 | 775  |
| PAR:VOR | conclusive   | - | -    | -         | 0.75 [0.59-0.94] | -   | -    |
| REB:SER | inconclusive | - | -    | -         | 0.93 [0.70-1.23] | 254 | 809  |
| REB:TRA | inconclusive | - | -    | -         | 1.08 [0.75-1.55] | 234 | 751  |
| REB:VEN | inconclusive | 1 | 167  | 2000-2000 | 0.93 [0.72-1.19] | 268 | 858  |
| REB:VIL | inconclusive | - | -    | -         | 0.92 [0.62-1.38] | 203 | 677  |
| REB:VOR | conclusive   | - | -    | -         | 0.62 [0.46-0.84] | -   | -    |
| SER:TRA | inconclusive | 1 | 122  | 2004-2004 | 1.16 [0.84-1.61] | 260 | 802  |
| SER:VEN | inconclusive | 4 | 1058 | 1998-2004 | 1.00 [0.83-1.21] | 320 | 1022 |
| SER:VIL | inconclusive | - | -    | -         | 0.99 [0.69-1.44] | 230 | 723  |
| SER:VOR | conclusive   | - | -    | -         | 0.67 [0.51-0.87] | -   | -    |
| TRA:VEN | inconclusive | 1 | 153  | 1994-1994 | 0.86 [0.64-1.17] | 200 | 744  |
| TRA:VIL | inconclusive | - | -    | -         | 0.86 [0.55-1.33] | 165 | 621  |
| TRA:VOR | conclusive   | - | -    | -         | 0.58 [0.40-0.82] | -   | -    |
| VEN:VIL | inconclusive | - | -    | -         | 0.99 [0.70-1.41] | 237 | 739  |
| VEN:VOR | conclusive   | 2 | 767  | 2007-2013 | 0.67 [0.53-0.84] | -   | -    |
| VIL:VOR | conclusive   | - | -    | -         | 0.67 [0.46-0.99] | -   | -    |

---

### 3 Conditional power sensitivity analysis

**Figure 3a: Sensitivity analysis trial design:  $r$ .** Lines represent median conditional power across all comparisons with inconclusive evidence, estimated in dependence on the trial design ratio contributing direct/indirect evidence ( $r$ ). Horizontal red dashed lines indicate 20% and 80% conditional power conventionally at which sample sizes ( $N_{CP=20\%}$ ,  $N_{CP=80\%}$ ) were estimated.

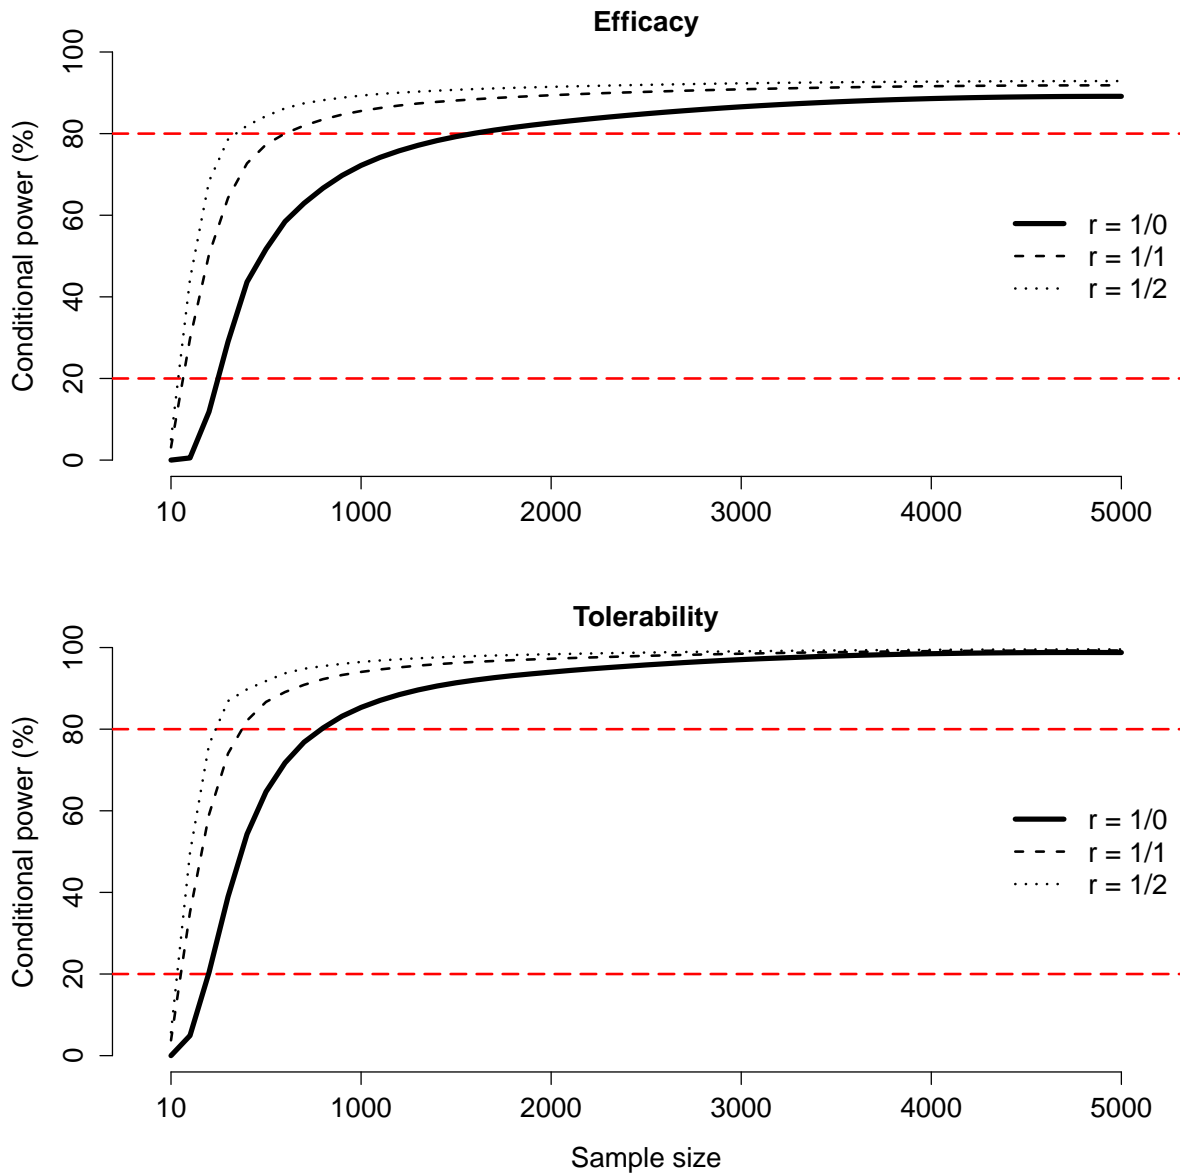

**Table 3a: Sensitivity analysis trial design efficacy.** Listed are sample size at 20% and 80% conditional power ( $N_{CP=20\%}$ ,  $N_{CP=80\%}$ ) for optimal trial designs considering trial design ratios of  $r = 1/0$ ,  $r = 1/1$ , and  $r = 1/2$ . For brevity, non-optimal trial designs are not listed due to space limitations (861 combinations for each treatment comparison).

|         | $r = 1/0$     |               | $r = 1/1$         |               | $r = 1/2$                   |               |
|---------|---------------|---------------|-------------------|---------------|-----------------------------|---------------|
|         | (one trial)   |               | (two trials)      |               | (three trials)              |               |
|         | $N_{CP=20\%}$ | $N_{CP=80\%}$ | $N_{CP=20\%}$     | $N_{CP=80\%}$ | $N_{CP=20\%}$               | $N_{CP=80\%}$ |
| AAA:AGO |               |               |                   |               |                             |               |
| AAA:AMI |               |               |                   |               |                             |               |
| AAA:BUP |               |               |                   |               |                             |               |
| AAA:CIT |               |               |                   |               |                             |               |
| AAA:CLO |               |               |                   |               |                             |               |
| AAA:DES |               |               |                   |               |                             |               |
| AAA:DUL |               |               |                   |               |                             |               |
| AAA:ESC |               |               |                   |               |                             |               |
| AAA:FLO |               |               |                   |               |                             |               |
| AAA:FLV |               |               |                   |               |                             |               |
| AAA:LEV |               |               |                   |               |                             |               |
| AAA:MIL |               |               |                   |               |                             |               |
| AAA:MIR |               |               |                   |               |                             |               |
| AAA:NEF |               |               |                   |               |                             |               |
| AAA:PAR |               |               |                   |               |                             |               |
| AAA:REB |               |               |                   |               |                             |               |
| AAA:SER |               |               |                   |               |                             |               |
| AAA:TRA |               |               |                   |               |                             |               |
| AAA:VEN |               |               |                   |               |                             |               |
| AAA:VIL |               |               |                   |               |                             |               |
| AAA:VOR |               |               |                   |               |                             |               |
| AGO:AMI |               |               |                   |               |                             |               |
| AGO:BUP | 343           | 2176          | AGO:BUP / PLA:AGO | 168 1518      | AGO:BUP / AGO:SER / BUP:PAR | 132 1338      |
| AGO:CIT | 351           | 2252          | AGO:CIT / AGO:ESC | 138 1362      | AGO:CIT / AGO:ESC / AGO:SER | 120 1158      |
| AGO:CLO | 153           | 1304          | AGO:CLO / PLA:CLO | 92 906        | AGO:CLO / PLA:BUP / BUP:ESC | 102 720       |
| AGO:DES | 300           | 1801          | AGO:DES / PLA:DES | 126 1196      | AGO:DES / BUP:FLO / BUP:PAR | 114 984       |
| AGO:DUL | 49            | 2142          | AGO:DUL / PLA:AGO | 100 1430      | AGO:DUL / PLA:AGO / AGO:VOR | 117 1257      |
| AGO:ESC | 322           | 2475          | AGO:ESC / AGO:CIT | 168 1642      | AGO:ESC / PLA:AGO / AGO:CIT | 132 1398      |
| AGO:FLO | 381           | 2942          | AGO:FLO / PLA:AGO | 164 1668      | AGO:FLO / PLA:AGO / AGO:AMI | 126 1335      |
| AGO:FLV | 194           | 1553          | AGO:FLV / PLA:FLV | 104 1054      | AGO:FLV / PLA:BUP / BUP:PAR | 108 837       |
| AGO:LEV | 252           | 1175          | AGO:LEV / PLA:LEV | 88 772        | AGO:LEV / PLA:BUP / BUP:PAR | 96 645        |
| AGO:MIL | 229           | 1156          | AGO:MIL / PLA:MIL | 84 720        | AGO:MIL / PLA:BUP / BUP:FLV | 93 624        |

|         |     |      |                   |     |      |                             |     |      |
|---------|-----|------|-------------------|-----|------|-----------------------------|-----|------|
| AGO:MIR | 66  | 1799 | AGO:MIR / PLA:MIR | 108 | 1330 | AGO:MIR / PLA:BUP / AGO:AMI | 117 | 1170 |
| AGO:NEF | 275 | 1480 | AGO:NEF / PLA:NEF | 100 | 922  | AGO:NEF / PLA:BUP / BUP:PAR | 102 | 738  |
| AGO:PAR |     |      |                   |     |      |                             |     |      |
| AGO:REB | 156 | 1797 | AGO:REB / PLA:REB | 102 | 1084 | AGO:REB / PLA:BUP / BUP:REB | 108 | 855  |
| AGO:SER | 368 | 2412 | AGO:SER / AGO:AMI | 190 | 1630 | AGO:SER / AGO:AMI / AGO:BUP | 135 | 1386 |
| AGO:TRA | 222 | 1450 | AGO:TRA / PLA:TRA | 96  | 940  | AGO:TRA / PLA:BUP / BUP:FLO | 102 | 744  |
| AGO:VEN | 130 | 2494 | AGO:VEN / PLA:AGO | 136 | 1762 | AGO:VEN / PLA:AGO / AGO:FLO | 132 | 1485 |
| AGO:VIL | 274 | 1555 | AGO:VIL / PLA:VIL | 108 | 1000 | AGO:VIL / PLA:BUP / BUP:REB | 105 | 798  |
| AGO:VOR | 326 | 1986 | AGO:VOR / FLO:VOR | 178 | 1500 | AGO:VOR / AGO:DUL / BUP:FLV | 132 | 1299 |
| AMI:BUP |     |      |                   |     |      |                             |     |      |
| AMI:CIT |     |      |                   |     |      |                             |     |      |
| AMI:CLO | 58  | 1576 | AMI:CLO / PLA:CLO | 86  | 874  | AMI:CLO / PLA:BUP / BUP:FLO | 96  | 675  |
| AMI:DES |     |      |                   |     |      |                             |     |      |
| AMI:DUL |     |      |                   |     |      |                             |     |      |
| AMI:ESC |     |      |                   |     |      |                             |     |      |
| AMI:FLO |     |      |                   |     |      |                             |     |      |
| AMI:FLV |     |      |                   |     |      |                             |     |      |
| AMI:LEV |     |      |                   |     |      |                             |     |      |
| AMI:MIL |     |      |                   |     |      |                             |     |      |
| AMI:MIR |     |      |                   |     |      |                             |     |      |
| AMI:NEF |     |      |                   |     |      |                             |     |      |
| AMI:PAR |     |      |                   |     |      |                             |     |      |
| AMI:REB |     |      |                   |     |      |                             |     |      |
| AMI:SER |     |      |                   |     |      |                             |     |      |
| AMI:TRA |     |      |                   |     |      |                             |     |      |
| AMI:VEN |     |      |                   |     |      |                             |     |      |
| AMI:VIL |     |      |                   |     |      |                             |     |      |
| AMI:VOR |     |      |                   |     |      |                             |     |      |
| BUP:CIT | 346 | 2302 | BUP:CIT / BUP:ESC | 188 | 1632 | BUP:CIT / AGO:FLV / AGO:TRA | 138 | 1431 |
| BUP:CLO | 109 | 1295 | BUP:CLO / PLA:CLO | 88  | 884  | BUP:CLO / PLA:BUP / BUP:ESC | 99  | 702  |
| BUP:DES | 313 | 1834 | BUP:DES / DES:SER | 140 | 1264 | BUP:DES / PLA:BUP / BUP:SER | 117 | 1044 |
| BUP:DUL |     |      |                   |     |      |                             |     |      |
| BUP:ESC | 254 | 2486 | BUP:ESC / BUP:CIT | 186 | 1964 | BUP:ESC / AGO:DES / AGO:FLO | 150 | 1659 |
| BUP:FLO | 406 | 2963 | BUP:FLO / AMI:BUP | 282 | 2164 | BUP:FLO / AGO:CIT / AGO:SER | 162 | 1707 |
| BUP:FLV | 131 | 1555 | BUP:FLV / PLA:FLV | 116 | 1220 | BUP:FLV / PLA:BUP / BUP:SER | 114 | 996  |
| BUP:LEV | 250 | 1176 | BUP:LEV / LEV:SER | 108 | 924  | BUP:LEV / PLA:BUP / BUP:SER | 105 | 753  |
| BUP:MIL | 213 | 1147 | BUP:MIL / PLA:MIL | 98  | 864  | BUP:MIL / PLA:BUP / BUP:SER | 99  | 702  |
| BUP:MIR |     |      |                   |     |      |                             |     |      |
| BUP:NEF | 284 | 1493 | BUP:NEF / PLA:NEF | 130 | 1108 | BUP:NEF / PLA:BUP / BUP:SER | 114 | 906  |
| BUP:PAR |     |      |                   |     |      |                             |     |      |
| BUP:REB | 224 | 1824 | BUP:REB / REB:SER | 148 | 1420 | BUP:REB / PLA:BUP / BUP:SER | 129 | 1239 |
| BUP:SER | 385 | 2648 | BUP:SER / AMI:BUP | 270 | 2026 | BUP:SER / AGO:CIT / AGO:DES | 162 | 1695 |

|         |     |      |                   |     |      |                             |     |      |
|---------|-----|------|-------------------|-----|------|-----------------------------|-----|------|
| BUP:TRA | 187 | 1493 | BUP:TRA / PLA:TRA | 126 | 1220 | BUP:TRA / PLA:BUP / BUP:TRA | 117 | 999  |
| BUP:VEN | 54  | 2499 | BUP:VEN / AGO:BUP | 112 | 1970 | BUP:VEN / AGO:AMI / AGO:LEV | 135 | 1653 |
| BUP:VIL | 287 | 1574 | BUP:VIL / PLA:VIL | 130 | 1128 | BUP:VIL / PLA:BUP / BUP:TRA | 114 | 915  |
| BUP:VOR | 318 | 2018 | BUP:VOR / SER:VOR | 216 | 1662 | BUP:VOR / BUP:FLV / BUP:TRA | 147 | 1458 |
| CIT:CLO | 131 | 1349 | CIT:CLO / PLA:CLO | 100 | 1012 | CIT:CLO / PLA:BUP / BUP:ESC | 105 | 780  |
| CIT:DES | 301 | 1911 | CIT:DES / DES:ESC | 186 | 1514 | CIT:DES / BUP:ESC / BUP:SER | 135 | 1302 |
| CIT:DUL | 59  | 2319 | CIT:DUL / CIT:VOR | 118 | 1940 | CIT:DUL / AGO:TRA / BUP:CLO | 138 | 1701 |
| CIT:ESC | 341 | 3034 | CIT:ESC / CIT:DUL | 250 | 2468 | CIT:ESC / PLA:AGO / AGO:FLV | 174 | 2049 |
| CIT:FLO | 375 | 3208 | CIT:FLO / CIT:VEN | 240 | 2286 | CIT:FLO / AGO:TRA / AMI:BUP | 159 | 1800 |
| CIT:FLV | 225 | 1706 | CIT:FLV / ESC:FLV | 150 | 1380 | CIT:FLV / PLA:BUP / BUP:FLO | 126 | 1179 |
| CIT:LEV | 256 | 1205 | CIT:LEV / ESC:LEV | 104 | 894  | CIT:LEV / BUP:FLO / BUP:FLV | 102 | 723  |
| CIT:MIL | 237 | 1189 | CIT:MIL / MIL:VOR | 126 | 1034 | CIT:MIL / BUP:FLO / BUP:VOR | 111 | 837  |
| CIT:MIR | 56  | 1965 | CIT:MIR / ESC:MIR | 114 | 1820 | CIT:MIR / BUP:FLO / BUP:SER | 138 | 1605 |
| CIT:NEF | 275 | 1539 | CIT:NEF / ESC:NEF | 148 | 1226 | CIT:NEF / AGO:CLO / BUP:FLO | 120 | 1011 |
| CIT:PAR |     |      |                   |     |      |                             |     |      |
| CIT:REB | 88  | 1942 | CIT:REB / ESC:REB | 130 | 1616 | CIT:REB / BUP:FLO / BUP:SER | 135 | 1410 |
| CIT:SER | 400 | 2772 | CIT:SER / BUP:CIT | 362 | 2464 | CIT:SER / AGO:CIT / AGO:DES | 201 | 2079 |
| CIT:TRA | 237 | 1521 | CIT:TRA / ESC:TRA | 154 | 1330 | CIT:TRA / BUP:FLO / BUP:FLV | 126 | 1131 |
| CIT:VEN | 157 | 2679 | CIT:VEN / CIT:VOR | 172 | 2520 | CIT:VEN / AGO:MIL / BUP:CLO | 171 | 2085 |
| CIT:VIL | 277 | 1713 | CIT:VIL / ESC:VIL | 164 | 1358 | CIT:VIL / BUP:FLO / BUP:TRA | 126 | 1140 |
| CIT:VOR | 338 | 2108 | CIT:VOR / ESC:VOR | 254 | 1746 | CIT:VOR / BUP:FLO / BUP:TRA | 156 | 1506 |
| CLO:DES | 86  | 1337 | CLO:DES / CLO:VOR | 112 | 1140 | CLO:DES / PLA:AGO / AGO:MIL | 114 | 957  |
| CLO:DUL | 285 | 1462 | CLO:DUL / CLO:VOR | 142 | 1154 | CLO:DUL / AGO:MIL / BUP:DES | 117 | 945  |
| CLO:ESC | 269 | 1543 | CLO:ESC / CLO:VOR | 156 | 1280 | CLO:ESC / AGO:ESC / AGO:LEV | 123 | 1047 |
| CLO:FLO | 62  | 1708 | CLO:FLO / CLO:VOR | 108 | 1196 | CLO:FLO / PLA:AGO / AGO:CIT | 111 | 900  |
| CLO:FLV | 265 | 1301 | CLO:FLV / CLO:VOR | 172 | 1298 | CLO:FLV / AGO:SER / BUP:DES | 129 | 1143 |
| CLO:LEV | 186 | 1051 | CLO:LEV / LEV:PAR | 112 | 964  | CLO:LEV / BUP:DES / BUP:VOR | 111 | 840  |
| CLO:MIL | 205 | 1070 | CLO:MIL / MIL:VOR | 112 | 976  | CLO:MIL / BUP:DES / BUP:VOR | 111 | 852  |
| CLO:MIR | 274 | 1364 | CLO:MIR / AMI:CLO | 150 | 1190 | CLO:MIR / AGO:CIT / BUP:CIT | 120 | 1005 |
| CLO:NEF | 102 | 1218 | CLO:NEF / CLO:VOR | 118 | 1152 | CLO:NEF / BUP:DES / BUP:VOR | 117 | 981  |
| CLO:PAR | 308 | 1716 | CLO:PAR / CLO:VOR | 168 | 1306 | CLO:PAR / AGO:CIT / AGO:LEV | 123 | 1047 |
| CLO:REB |     |      |                   |     |      |                             |     |      |
| CLO:SER | 156 | 1616 | CLO:SER / PLA:CLO | 110 | 1092 | CLO:SER / PLA:AGO / AGO:CIT | 108 | 840  |
| CLO:TRA | 254 | 1211 | CLO:TRA / PLA:CLO | 108 | 952  | CLO:TRA / PLA:AGO / BUP:REB | 108 | 813  |
| CLO:VEN | 293 | 1567 | CLO:VEN / PLA:CLO | 136 | 1130 | CLO:VEN / PLA:AGO / AGO:MIR | 114 | 903  |
| CLO:VIL | 83  | 1247 | CLO:VIL / PLA:CLO | 92  | 932  | CLO:VIL / PLA:AGO / BUP:REB | 105 | 768  |
| CLO:VOR | 210 | 1366 | CLO:VOR / PLA:CLO | 110 | 1028 | CLO:VOR / PLA:AGO / AGO:LEV | 108 | 822  |
| DES:DUL |     |      |                   |     |      |                             |     |      |
| DES:ESC | 136 | 1905 | DES:ESC / CIT:DES | 132 | 1454 | DES:ESC / AGO:ESC / AGO:NEF | 126 | 1236 |
| DES:FLO | 345 | 2186 | DES:FLO / DES:VEN | 174 | 1438 | DES:FLO / AGO:VIL / BUP:CLO | 126 | 1149 |
| DES:FLV | 89  | 1330 | DES:FLV / PLA:FLV | 112 | 1202 | DES:FLV / PLA:BUP / AGO:TRA | 117 | 1035 |
| DES:LEV | 229 | 1089 | DES:LEV / PLA:LEV | 98  | 864  | DES:LEV / PLA:BUP / BUP:FLO | 102 | 714  |

|         |     |      |                   |     |      |                             |     |      |
|---------|-----|------|-------------------|-----|------|-----------------------------|-----|------|
| DES:MIL | 175 | 1051 | DES:MIL / PLA:MIL | 94  | 836  | DES:MIL / PLA:BUP / BUP:FLO | 99  | 693  |
| DES:MIR |     |      |                   |     |      |                             |     |      |
| DES:NEF | 271 | 1327 | DES:NEF / PLA:NEF | 136 | 1116 | DES:NEF / PLA:BUP / BUP:FLO | 117 | 957  |
| DES:PAR |     |      |                   |     |      |                             |     |      |
| DES:REB | 269 | 1565 | DES:REB / PLA:REB | 136 | 1230 | DES:REB / PLA:BUP / AGO:NEF | 120 | 1059 |
| DES:SER | 305 | 1925 | DES:SER / AMI:DES | 198 | 1532 | DES:SER / AGO:CIT / AGO:NEF | 135 | 1293 |
| DES:TRA | 123 | 1268 | DES:TRA / PLA:TRA | 112 | 1122 | DES:TRA / PLA:BUP / BUP:FLO | 114 | 936  |
| DES:VEN | 49  | 1826 | DES:VEN / DES:FLO | 10  | 1348 | DES:VEN / PLA:AGO / AGO:NEF | 10  | 1140 |
| DES:VIL | 278 | 1391 | DES:VIL / PLA:VIL | 128 | 1088 | DES:VIL / PLA:BUP / BUP:FLO | 114 | 930  |
| DES:VOR | 268 | 1670 | DES:VOR / DES:DUL | 164 | 1418 | DES:VOR / AGO:MIL / BUP:CLO | 132 | 1254 |
| DUL:ESC | 316 | 2987 | DUL:ESC / CIT:DUL | 220 | 2312 | DUL:ESC / AGO:ESC / BUP:CIT | 168 | 1968 |
| DUL:FLO |     |      |                   |     |      |                             |     |      |
| DUL:FLV | 310 | 1782 | DUL:FLV / FLV:VOR | 150 | 1278 | DUL:FLV / PLA:BUP / BUP:VOR | 120 | 1041 |
| DUL:LEV | 180 | 1263 | DUL:LEV / LEV:VOR | 100 | 920  | DUL:LEV / BUP:PAR / BUP:VOR | 102 | 732  |
| DUL:MIL | 249 | 1258 | DUL:MIL / PLA:MIL | 98  | 866  | DUL:MIL / PLA:BUP / BUP:FLO | 99  | 696  |
| DUL:MIR | 343 | 2164 | DUL:MIR / MIR:VOR | 214 | 1632 | DUL:MIR / BUP:FLO / BUP:VOR | 141 | 1404 |
| DUL:NEF | 50  | 1577 | DUL:NEF / NEF:VOR | 100 | 1126 | DUL:NEF / BUP:PAR / BUP:VOR | 105 | 870  |
| DUL:PAR | 471 | 3546 | DUL:PAR / CLO:DUL | 330 | 2568 | DUL:PAR / AGO:CIT / AGO:FLV | 177 | 1953 |
| DUL:REB |     |      |                   |     |      |                             |     |      |
| DUL:SER |     |      |                   |     |      |                             |     |      |
| DUL:TRA | 294 | 1635 | DUL:TRA / TRA:VOR | 142 | 1210 | DUL:TRA / BUP:FLO / BUP:VOR | 117 | 981  |
| DUL:VEN | 407 | 2994 | DUL:VEN / DUL:FLO | 308 | 2384 | DUL:VEN / AGO:PAR / AGO:VEN | 180 | 1986 |
| DUL:VIL |     |      |                   |     |      |                             |     |      |
| DUL:VOR | 101 | 2425 | DUL:VOR / ESC:VOR | 132 | 1798 | DUL:VOR / BUP:FLO / BUP:REB | 135 | 1533 |
| ESC:FLO | 52  | 3750 | ESC:FLO / AMI:ESC | 104 | 2898 | ESC:FLO / AGO:CIT / BUP:DUL | 144 | 2250 |
| ESC:FLV | 298 | 1805 | ESC:FLV / PLA:FLV | 146 | 1296 | ESC:FLV / PLA:BUP / AGO:FLO | 120 | 1041 |
| ESC:LEV | 251 | 1259 | ESC:LEV / CIT:LEV | 112 | 948  | ESC:LEV / AGO:FLO / BUP:PAR | 105 | 762  |
| ESC:MIL | 260 | 1245 | ESC:MIL / CIT:MIL | 108 | 922  | ESC:MIL / PLA:BUP / AGO:FLO | 102 | 738  |
| ESC:MIR | 252 | 2197 | ESC:MIR / CIT:MIR | 160 | 1638 | ESC:MIR / AGO:FLO / AGO:PAR | 135 | 1389 |
| ESC:NEF | 201 | 1622 | ESC:NEF / CIT:NEF | 114 | 1080 | ESC:NEF / PLA:BUP / AGO:FLO | 108 | 843  |
| ESC:PAR | 283 | 3689 | ESC:PAR / CLO:ESC | 214 | 3028 | ESC:PAR / AGO:CIT / AGO:FLV | 183 | 2316 |
| ESC:REB |     |      |                   |     |      |                             |     |      |
| ESC:SER | 323 | 3019 | ESC:SER / CIT:SER | 226 | 2506 | ESC:SER / AGO:CIT / AGO:FLO | 171 | 2094 |
| ESC:TRA | 293 | 1642 | ESC:TRA / CIT:TRA | 168 | 1320 | ESC:TRA / AGO:FLO / AGO:PAR | 123 | 1083 |
| ESC:VEN | 386 | 3148 | ESC:VEN / ESC:FLO | 324 | 2788 | ESC:VEN / AGO:FLO / AGO:REB | 201 | 2283 |
| ESC:VIL | 158 | 1731 | ESC:VIL / DUL:VIL | 126 | 1258 | ESC:VIL / AGO:FLO / AGO:PAR | 117 | 1008 |
| ESC:VOR | 341 | 2314 | ESC:VOR / CIT:VOR | 230 | 1752 | ESC:VOR / AGO:FLO / BUP:FLV | 150 | 1488 |
| FLO:FLV | 51  | 1853 | FLO:FLV / PLA:FLV | 102 | 1348 | FLO:FLV / PLA:BUP / BUP:VEN | 117 | 1068 |
| FLO:LEV | 254 | 1253 | FLO:LEV / LEV:PAR | 114 | 952  | FLO:LEV / BUP:PAR / BUP:VEN | 105 | 753  |
| FLO:MIL | 180 | 1245 | FLO:MIL / MIL:VEN | 104 | 948  | FLO:MIL / PLA:BUP / BUP:VEN | 102 | 747  |
| FLO:MIR |     |      |                   |     |      |                             |     |      |
| FLO:NEF | 308 | 1722 | FLO:NEF / NEF:VEN | 142 | 1172 | FLO:NEF / BUP:PAR / BUP:VEN | 114 | 915  |



|         |     |      |                   |     |      |                             |     |      |  |
|---------|-----|------|-------------------|-----|------|-----------------------------|-----|------|--|
| FLO:PAR |     |      |                   |     |      |                             |     |      |  |
| FLO:REB | 280 | 2290 | FLO:REB / REB:VEN | 178 | 1632 | FLO:REB / BUP:SER / BUP:VEN | 135 | 1329 |  |
| FLO:SER | 414 | 3711 | FLO:SER / AGO:SER | 334 | 3032 | FLO:SER / AGO:BUP / BUP:VEN | 198 | 2331 |  |
| FLO:TRA | 90  | 1689 | FLO:TRA / TRA:VOR | 124 | 1366 | FLO:TRA / BUP:REB / BUP:VEN | 120 | 1107 |  |
| FLO:VEN |     |      |                   |     |      |                             |     |      |  |
| FLO:VIL | 314 | 1826 | FLO:VIL / VEN:VIL | 170 | 1334 | FLO:VIL / BUP:REB / BUP:VIL | 123 | 1059 |  |
| FLO:VOR | 318 | 2510 | FLO:VOR / AMI:VOR | 196 | 1788 | FLO:VOR / AGO:CLO / BUP:REB | 141 | 1452 |  |
| FLV:LEV | 209 | 1122 | FLV:LEV / LEV:MIR | 102 | 894  | FLV:LEV / AGO:VEN / BUP:MIR | 102 | 741  |  |
| FLV:MIL | 254 | 1198 | FLV:MIL / MIL:VOR | 124 | 1022 | FLV:MIL / BUP:MIR / BUP:SER | 111 | 864  |  |
| FLV:MIR | 295 | 1689 | FLV:MIR / AMI:FLV | 188 | 1462 | FLV:MIR / AGO:CIT / BUP:FLO | 135 | 1275 |  |
| FLV:NEF | 120 | 1337 | FLV:NEF / AMI:NEF | 96  | 984  | FLV:NEF / PLA:BUP / AGO:CLO | 105 | 795  |  |
| FLV:PAR | 332 | 2078 | FLV:PAR / PLA:FLV | 162 | 1356 | FLV:PAR / PLA:AGO / AGO:NEF | 120 | 1059 |  |
| FLV:REB |     |      |                   |     |      |                             |     |      |  |
| FLV:SER | 170 | 1919 | FLV:SER / PLA:FLV | 126 | 1352 | FLV:SER / PLA:AGO / AGO:DES | 120 | 1113 |  |
| FLV:TRA | 273 | 1342 | FLV:TRA / MIL:TRA | 120 | 1050 | FLV:TRA / PLA:AGO / PLA:BUP | 114 | 912  |  |
| FLV:VEN | 325 | 1926 | FLV:VEN / PLA:FLV | 168 | 1374 | FLV:VEN / PLA:AGO / AGO:TRA | 123 | 1119 |  |
| FLV:VIL | 93  | 1383 | FLV:VIL / MIL:VIL | 102 | 1048 | FLV:VIL / PLA:AGO / BUP:NEF | 111 | 873  |  |
| FLV:VOR | 250 | 1595 | FLV:VOR / DUL:FLV | 128 | 1200 | FLV:VOR / PLA:AGO / AGO:NEF | 117 | 987  |  |
| LEV:MIL | 188 | 894  | LEV:MIL / FLV:LEV | 96  | 828  | LEV:MIL / PLA:BUP / BUP:DES | 102 | 711  |  |
| LEV:MIR | 147 | 1069 | LEV:MIR / PLA:LEV | 90  | 828  | LEV:MIR / PLA:AGO / AGO:CIT | 99  | 678  |  |
| LEV:NEF | 226 | 1048 | LEV:NEF / LEV:PAR | 104 | 898  | LEV:NEF / AGO:TRA / BUP:DES | 105 | 762  |  |
| LEV:PAR | 163 | 1197 | LEV:PAR / FLO:LEV | 98  | 888  | LEV:PAR / PLA:AGO / AGO:TRA | 99  | 696  |  |
| LEV:REB | 197 | 1150 | LEV:REB / PLA:LEV | 94  | 838  | LEV:REB / PLA:AGO / BUP:DES | 99  | 693  |  |
| LEV:SER | 259 | 1228 | LEV:SER / PLA:LEV | 98  | 852  | LEV:SER / PLA:AGO / AGO:CIT | 99  | 684  |  |
| LEV:TRA | 194 | 1001 | LEV:TRA / FLO:LEV | 100 | 882  | LEV:TRA / AGO:TRA / BUP:DES | 102 | 741  |  |
| LEV:VEN | 201 | 1180 | LEV:VEN / FLO:LEV | 98  | 880  | LEV:VEN / PLA:AGO / AGO:TRA | 99  | 699  |  |
| LEV:VIL | 227 | 1076 | LEV:VIL / CIT:LEV | 106 | 904  | LEV:VIL / PLA:AGO / AGO:ESC | 105 | 765  |  |
| LEV:VOR | 246 | 1151 | LEV:VOR / DUL:LEV | 112 | 938  | LEV:VOR / AGO:NEF / BUP:FLV | 105 | 777  |  |
| MIL:MIR | 225 | 1146 | MIL:MIR / PLA:MIL | 106 | 928  | MIL:MIR / PLA:AGO / BUP:LEV | 105 | 756  |  |
| MIL:NEF | 193 | 1083 | MIL:NEF / MIL:VOR | 106 | 930  | MIL:NEF / BUP:MIR / BUP:VOR | 108 | 807  |  |
| MIL:PAR | 250 | 1319 | MIL:PAR / PLA:MIL | 110 | 960  | MIL:PAR / PLA:AGO / AGO:NEF | 105 | 753  |  |
| MIL:REB | 97  | 1183 | MIL:REB / FLO:MIL | 94  | 896  | MIL:REB / PLA:AGO / AGO:TRA | 102 | 732  |  |
| MIL:SER | 248 | 1291 | MIL:SER / MIL:VOR | 116 | 992  | MIL:SER / AGO:DES / AGO:TRA | 108 | 798  |  |
| MIL:TRA | 230 | 1054 | MIL:TRA / PLA:MIL | 104 | 894  | MIL:TRA / PLA:AGO / BUP:FLO | 105 | 753  |  |
| MIL:VEN | 256 | 1249 | MIL:VEN / MIL:VOR | 122 | 1004 | MIL:VEN / AGO:TRA / BUP:MIR | 108 | 810  |  |
| MIL:VIL | 184 | 1104 | MIL:VIL / CIT:MIL | 106 | 932  | MIL:VIL / PLA:AGO / AGO:ESC | 105 | 789  |  |
| MIL:VOR | 244 | 1173 | MIL:VOR / DUL:MIL | 106 | 916  | MIL:VOR / PLA:AGO / AGO:NEF | 105 | 750  |  |
| MIR:NEF | 53  | 1470 | MIR:NEF / AMI:NEF | 92  | 1088 | MIR:NEF / AGO:CLO / BUP:PAR | 108 | 843  |  |
| MIR:PAR | 397 | 2739 | MIR:PAR / DUL:MIR | 308 | 2058 | MIR:PAR / AGO:AMI / AGO:NEF | 165 | 1623 |  |
| MIR:REB |     |      |                   |     |      |                             |     |      |  |
| MIR:SER |     |      |                   |     |      |                             |     |      |  |
| MIR:TRA | 294 | 1594 | MIR:TRA / FLV:TRA | 164 | 1318 | MIR:TRA / AGO:CLO / AGO:VOR | 126 | 1122 |  |

|         |     |      |                   |     |      |                             |     |      |
|---------|-----|------|-------------------|-----|------|-----------------------------|-----|------|
| MIR:VEN | 355 | 2487 | MIR:VEN / MIR:VOR | 254 | 1918 | MIR:VEN / AGO:TRA / BUP:NEF | 156 | 1578 |
| MIR:VIL |     |      |                   |     |      |                             |     |      |
| MIR:VOR | 135 | 1871 | MIR:VOR / DUL:MIR | 134 | 1496 | MIR:VOR / AGO:CLO / AGO:NEF | 129 | 1326 |
| NEF:PAR |     |      |                   |     |      |                             |     |      |
| NEF:REB | 255 | 1347 | NEF:REB / CIT:NEF | 130 | 1120 | NEF:REB / AGO:ESC / AGO:TRA | 117 | 957  |
| NEF:SER | 278 | 1557 | NEF:SER / AMI:NEF | 132 | 1160 | NEF:SER / AGO:CIT / AGO:DES | 114 | 921  |
| NEF:TRA | 134 | 1129 | NEF:TRA / AMI:NEF | 102 | 1004 | NEF:TRA / AGO:CIT / AGO:CLO | 108 | 831  |
| NEF:VEN | 76  | 1447 | NEF:VEN / AMI:NEF | 102 | 1180 | NEF:VEN / AGO:CIT / AGO:TRA | 111 | 906  |
| NEF:VIL | 258 | 1223 | NEF:VIL / CIT:NEF | 120 | 1016 | NEF:VIL / PLA:AGO / PLA:BUP | 111 | 879  |
| NEF:VOR | 247 | 1378 | NEF:VOR / DUL:NEF | 138 | 1170 | NEF:VOR / AGO:NEF / BUP:MIR | 117 | 993  |
| PAR:REB |     |      |                   |     |      |                             |     |      |
| PAR:SER |     |      |                   |     |      |                             |     |      |
| PAR:TRA | 312 | 1882 | PAR:TRA / DUL:TRA | 158 | 1310 | PAR:TRA / AGO:PAR / AGO:VEN | 120 | 1029 |
| PAR:VEN | 485 | 4190 | PAR:VEN / MIL:VEN | 384 | 3464 | PAR:VEN / AGO:CLO / AGO:LEV | 222 | 2586 |
| PAR:VIL |     |      |                   |     |      |                             |     |      |
| PAR:VOR | 106 | 2579 | PAR:VOR / CLO:VOR | 132 | 1746 | PAR:VOR / AGO:CLO / AGO:VEN | 132 | 1416 |
| REB:SER | 128 | 1801 | REB:SER / BUP:REB | 138 | 1498 | REB:SER / AGO:CIT / AGO:DES | 129 | 1275 |
| REB:TRA |     |      |                   |     |      |                             |     |      |
| REB:VEN |     |      |                   |     |      |                             |     |      |
| REB:VIL | 254 | 1330 | REB:VIL / PAR:VIL | 138 | 1168 | REB:VIL / AGO:VEN / BUP:MIL | 117 | 1011 |
| REB:VOR | 96  | 1567 | REB:VOR / DUL:REB | 118 | 1272 | REB:VOR / PLA:AGO / AGO:NEF | 117 | 1080 |
| SER:TRA | 204 | 1609 | SER:TRA / PLA:TRA | 124 | 1214 | SER:TRA / PLA:BUP / AGO:CLO | 114 | 957  |
| SER:VEN | 66  | 2940 | SER:VEN / AGO:SER | 120 | 2462 | SER:VEN / AGO:AMI / AGO:NEF | 147 | 2040 |
| SER:VIL | 285 | 1686 | SER:VIL / AMI:VIL | 126 | 1122 | SER:VIL / PLA:BUP / AGO:CLO | 111 | 885  |
| SER:VOR | 344 | 2230 | SER:VOR / AMI:VOR | 226 | 1702 | SER:VOR / AGO:CLO / AGO:VEN | 144 | 1443 |
| TRA:VEN | 307 | 1718 | TRA:VEN / PLA:TRA | 132 | 1144 | TRA:VEN / PLA:AGO / AGO:TRA | 111 | 903  |
| TRA:VIL | 127 | 1310 | TRA:VIL / CIT:TRA | 114 | 1120 | TRA:VIL / BUP:DUL / BUP:ESC | 114 | 942  |
| TRA:VOR | 258 | 1480 | TRA:VOR / DUL:TRA | 130 | 1150 | TRA:VOR / PLA:AGO / AGO:NEF | 114 | 954  |
| VEN:VIL | 56  | 1746 | VEN:VIL / FLO:VIL | 100 | 1126 | VEN:VIL / PLA:BUP / AGO:VEN | 108 | 849  |
| VEN:VOR | 274 | 2456 | VEN:VOR / FLO:VOR | 170 | 1724 | VEN:VOR / AGO:VEN / BUP:REB | 138 | 1452 |
| VIL:VOR | 240 | 1438 | VIL:VOR / DUL:VIL | 134 | 1178 | VIL:VOR / PLA:AGO / AGO:NEF | 117 | 996  |

**Table 3b: Sensitivity analysis trial design tolerability.** Listed are sample size at 20% and 80% conditional power ( $N_{CP=20\%}$ ,  $N_{CP=80\%}$ ) for optimal trial designs considering trial design ratios of  $r = 1/0$ ,  $r = 1/1$ , and  $r = 1/2$ . For brevity, non-optimal trial designs are not listed due to space limitations (861 combinations for each treatment comparison).

|         | $r = 1/0$     |               | $r = 1/1$         |               | $r = 1/2$      |                             |     |     |
|---------|---------------|---------------|-------------------|---------------|----------------|-----------------------------|-----|-----|
|         | (one trial)   |               | (two trials)      |               | (three trials) |                             |     |     |
|         | $N_{CP=20\%}$ | $N_{CP=80\%}$ | $N_{CP=20\%}$     | $N_{CP=80\%}$ | $N_{CP=20\%}$  | $N_{CP=80\%}$               |     |     |
| AAA:AGO | 264           | 1065          | AAA:AGO / AGO:AMI | 122           | 878            | AAA:AGO / AGO:PAR / AGO:VEN | 117 | 819 |
| AAA:AMI |               |               |                   |               |                |                             |     |     |
| AAA:BUP |               |               |                   |               |                |                             |     |     |
| AAA:CIT |               |               |                   |               |                |                             |     |     |
| AAA:CLO |               |               |                   |               |                |                             |     |     |
| AAA:DES |               |               |                   |               |                |                             |     |     |
| AAA:DUL |               |               |                   |               |                |                             |     |     |
| AAA:ESC |               |               |                   |               |                |                             |     |     |
| AAA:FLO |               |               |                   |               |                |                             |     |     |
| AAA:FLV |               |               |                   |               |                |                             |     |     |
| AAA:LEV |               |               |                   |               |                |                             |     |     |
| AAA:MIL |               |               |                   |               |                |                             |     |     |
| AAA:MIR |               |               |                   |               |                |                             |     |     |
| AAA:NEF |               |               |                   |               |                |                             |     |     |
| AAA:PAR |               |               |                   |               |                |                             |     |     |
| AAA:REB |               |               |                   |               |                |                             |     |     |
| AAA:SER |               |               |                   |               |                |                             |     |     |
| AAA:TRA |               |               |                   |               |                |                             |     |     |
| AAA:VEN |               |               |                   |               |                |                             |     |     |
| AAA:VIL |               |               |                   |               |                |                             |     |     |
| AAA:VOR |               |               |                   |               |                |                             |     |     |
| AGO:AMI |               |               |                   |               |                |                             |     |     |
| AGO:BUP |               |               |                   |               |                |                             |     |     |
| AGO:CIT |               |               |                   |               |                |                             |     |     |
| AGO:CLO |               |               |                   |               |                |                             |     |     |
| AGO:DES |               |               |                   |               |                |                             |     |     |
| AGO:DUL |               |               |                   |               |                |                             |     |     |
| AGO:ESC |               |               |                   |               |                |                             |     |     |
| AGO:FLO |               |               |                   |               |                |                             |     |     |
| AGO:FLV |               |               |                   |               |                |                             |     |     |
| AGO:LEV |               |               |                   |               |                |                             |     |     |
| AGO:MIL | 97            | 805           | AGO:MIL / MIL:VOR | 120           | 892            | AGO:MIL / AGO:AMI / AGO:VOR | 117 | 828 |

|         |     |      |                   |     |      |                             |          |
|---------|-----|------|-------------------|-----|------|-----------------------------|----------|
| AGO:MIR |     |      |                   |     |      |                             |          |
| AGO:NEF |     |      |                   |     |      |                             |          |
| AGO:PAR |     |      |                   |     |      |                             |          |
| AGO:REB |     |      |                   |     |      |                             |          |
| AGO:SER |     |      |                   |     |      |                             |          |
| AGO:TRA |     |      |                   |     |      |                             |          |
| AGO:VEN |     |      |                   |     |      |                             |          |
| AGO:VIL |     |      |                   |     |      |                             |          |
| AGO:VOR | 63  | 858  | AGO:VOR / FLO:VOR | 112 | 846  | AGO:VOR / PLA:FLO / AGO:FLO | 111 771  |
| AMI:BUP |     |      |                   |     |      |                             |          |
| AMI:CIT |     |      |                   |     |      |                             |          |
| AMI:CLO | 111 | 877  | AMI:CLO / CLO:VOR | 142 | 876  | AMI:CLO / AGO:BUP / AGO:VOR | 120 840  |
| AMI:DES |     |      |                   |     |      |                             |          |
| AMI:DUL | 79  | 868  | AMI:DUL / AMI:VOR | 190 | 1258 | AMI:DUL / AGO:BUP / AGO:VOR | 168 1161 |
| AMI:ESC |     |      |                   |     |      |                             |          |
| AMI:FLO |     |      |                   |     |      |                             |          |
| AMI:FLV | 196 | 806  | AMI:FLV / FLV:VOR | 138 | 924  | AMI:FLV / AGO:BUP / AGO:VOR | 126 894  |
| AMI:LEV | 158 | 635  | AMI:LEV / LEV:VOR | 108 | 788  | AMI:LEV / AGO:BUP / AGO:VOR | 108 747  |
| AMI:MIL |     |      |                   |     |      |                             |          |
| AMI:MIR |     |      |                   |     |      |                             |          |
| AMI:NEF |     |      |                   |     |      |                             |          |
| AMI:PAR |     |      |                   |     |      |                             |          |
| AMI:REB | 220 | 807  | AMI:REB / REB:SER | 160 | 896  | AMI:REB / AGO:BUP / AGO:VOR | 126 873  |
| AMI:SER |     |      |                   |     |      |                             |          |
| AMI:TRA | 243 | 766  | AMI:TRA / SER:TRA | 120 | 808  | AMI:TRA / AGO:BUP / AGO:VOR | 114 786  |
| AMI:VEN |     |      |                   |     |      |                             |          |
| AMI:VIL | 150 | 664  | AMI:VIL / VIL:VOR | 118 | 844  | AMI:VIL / AGO:BUP / AGO:VOR | 114 804  |
| AMI:VOR |     |      |                   |     |      |                             |          |
| BUP:CIT | 269 | 833  | BUP:CIT / CIT:VOR | 252 | 994  | BUP:CIT / AGO:CIT / AGO:VOR | 138 951  |
| BUP:CLO |     |      |                   |     |      |                             |          |
| BUP:DES | 250 | 789  | BUP:DES / DES:FLO | 150 | 838  | BUP:DES / AGO:CIT / AGO:VOR | 114 786  |
| BUP:DUL |     |      |                   |     |      |                             |          |
| BUP:ESC | 253 | 822  | BUP:ESC / BUP:VOR | 224 | 974  | BUP:ESC / AGO:CIT / AGO:VOR | 135 942  |
| BUP:FLO | 270 | 897  | BUP:FLO / BUP:PAR | 208 | 1008 | BUP:FLO / AGO:CIT / AGO:VOR | 150 1023 |
| BUP:FLV |     |      |                   |     |      |                             |          |
| BUP:LEV | 151 | 745  | BUP:LEV / LEV:VOR | 110 | 780  | BUP:LEV / AGO:CIT / AGO:VOR | 108 723  |
| BUP:MIL | 207 | 692  | BUP:MIL / MIL:VOR | 146 | 864  | BUP:MIL / AGO:CIT / AGO:VOR | 117 819  |
| BUP:MIR | 258 | 878  | BUP:MIR / AMI:BUP | 260 | 1012 | BUP:MIR / AGO:CIT / AGO:VOR | 138 966  |
| BUP:NEF | 225 | 769  | BUP:NEF / NEF:VOR | 162 | 892  | BUP:NEF / AGO:CIT / AGO:VOR | 120 852  |
| BUP:PAR | 255 | 1003 | BUP:PAR / BUP:VOR | 206 | 1068 | BUP:PAR / AGO:CIT / AGO:VOR | 153 1053 |
| BUP:REB |     |      |                   |     |      |                             |          |
| BUP:SER |     |      |                   |     |      |                             |          |

|         |     |     |                   |     |      |                             |          |
|---------|-----|-----|-------------------|-----|------|-----------------------------|----------|
| BUP:TRA |     |     |                   |     |      |                             |          |
| BUP:VEN |     |     |                   |     |      |                             |          |
| BUP:VIL | 153 | 773 | BUP:VIL / VIL:VOR | 124 | 836  | BUP:VIL / AGO:CIT / AGO:VOR | 111 777  |
| BUP:VOR | 220 | 793 | BUP:VOR / PAR:VOR | 146 | 834  | BUP:VOR / PLA:TRA / AGO:REB | 114 789  |
| CIT:CLO |     |     |                   |     |      |                             |          |
| CIT:DES | 251 | 777 | CIT:DES / DES:VOR | 200 | 930  | CIT:DES / AGO:CLO / AGO:VOR | 129 894  |
| CIT:DUL | 63  | 944 | CIT:DUL / CIT:VOR | 110 | 894  | CIT:DUL / AGO:CLO / AGO:VOR | 120 840  |
| CIT:ESC | 195 | 819 | CIT:ESC / CIT:DUL | 154 | 936  | CIT:ESC / AGO:CLO / AGO:VOR | 126 891  |
| CIT:FLO | 203 | 876 | CIT:FLO / CIT:VOR | 222 | 1152 | CIT:FLO / AGO:CLO / AGO:VOR | 162 1110 |
| CIT:FLV |     |     |                   |     |      |                             |          |
| CIT:LEV | 171 | 737 | CIT:LEV / FLO:LEV | 104 | 744  | CIT:LEV / AGO:CLO / AGO:VOR | 102 684  |
| CIT:MIL | 194 | 684 | CIT:MIL / MIL:VOR | 132 | 834  | CIT:MIL / AGO:CLO / AGO:VOR | 114 780  |
| CIT:MIR | 246 | 861 | CIT:MIR / CIT:VEN | 122 | 850  | CIT:MIR / AGO:CLO / AGO:VOR | 120 831  |
| CIT:NEF | 232 | 760 | CIT:NEF / AMI:NEF | 102 | 746  | CIT:NEF / AGO:CLO / AGO:VOR | 105 714  |
| CIT:PAR | 256 | 990 | CIT:PAR / CIT:VEN | 132 | 1038 | CIT:PAR / AGO:CLO / AGO:VOR | 150 1041 |
| CIT:REB |     |     |                   |     |      |                             |          |
| CIT:SER | 68  | 951 | CIT:SER / CIT:VEN | 90  | 1004 | CIT:SER / AGO:CLO / AGO:VOR | 132 945  |
| CIT:TRA |     |     |                   |     |      |                             |          |
| CIT:VEN |     |     |                   |     |      |                             |          |
| CIT:VIL | 171 | 796 | CIT:VIL / FLO:VIL | 110 | 760  | CIT:VIL / AGO:CLO / AGO:VOR | 105 705  |
| CIT:VOR | 189 | 783 | CIT:VOR / AMI:VOR | 148 | 844  | CIT:VOR / PLA:MIL / AGO:FLO | 117 801  |
| CLO:DES |     |     |                   |     |      |                             |          |
| CLO:DUL |     |     |                   |     |      |                             |          |
| CLO:ESC |     |     |                   |     |      |                             |          |
| CLO:FLO |     |     |                   |     |      |                             |          |
| CLO:FLV |     |     |                   |     |      |                             |          |
| CLO:LEV | 70  | 526 | CLO:LEV / LEV:PAR | 92  | 722  | CLO:LEV / AGO:DES / AGO:VOR | 102 666  |
| CLO:MIL |     |     |                   |     |      |                             |          |
| CLO:MIR |     |     |                   |     |      |                             |          |
| CLO:NEF |     |     |                   |     |      |                             |          |
| CLO:PAR |     |     |                   |     |      |                             |          |
| CLO:REB |     |     |                   |     |      |                             |          |
| CLO:SER |     |     |                   |     |      |                             |          |
| CLO:TRA | 102 | 611 | CLO:TRA / PAR:TRA | 116 | 814  | CLO:TRA / AGO:DES / AGO:VOR | 108 732  |
| CLO:VEN |     |     |                   |     |      |                             |          |
| CLO:VIL |     |     |                   |     |      |                             |          |
| CLO:VOR |     |     |                   |     |      |                             |          |
| DES:DUL | 146 | 878 | DES:DUL / DES:VOR | 126 | 902  | DES:DUL / AGO:DUL / AGO:VOR | 123 870  |
| DES:ESC | 200 | 735 | DES:ESC / DES:VOR | 162 | 896  | DES:ESC / AGO:DUL / AGO:VOR | 123 858  |
| DES:FLO | 203 | 776 | DES:FLO / DES:VOR | 172 | 936  | DES:FLO / AGO:DUL / AGO:VOR | 132 930  |
| DES:FLV | 93  | 825 | DES:FLV / DES:VOR | 118 | 880  | DES:FLV / AGO:DUL / AGO:VOR | 114 795  |
| DES:LEV | 183 | 713 | DES:LEV / LEV:VOR | 112 | 776  | DES:LEV / AGO:DUL / AGO:VOR | 105 708  |

|         |     |      |                   |     |     |                             |     |     |
|---------|-----|------|-------------------|-----|-----|-----------------------------|-----|-----|
| DES:MIL | 171 | 643  | DES:MIL / MIL:VEN | 108 | 738 | DES:MIL / AGO:DUL / AGO:VOR | 102 | 666 |
| DES:MIR | 254 | 792  | DES:MIR / PLA:DES | 82  | 574 | DES:MIR / PLA:AGO / PLA:AMI | 90  | 564 |
| DES:NEF | 224 | 724  | DES:NEF / PLA:NEF | 76  | 528 | DES:NEF / PLA:AGO / PLA:AMI | 87  | 540 |
| DES:PAR | 262 | 869  | DES:PAR / DES:FLO | 128 | 800 | DES:PAR / AGO:DUL / AGO:VOR | 114 | 786 |
| DES:REB | 105 | 829  | DES:REB / PLA:DES | 80  | 570 | DES:REB / PLA:AGO / PLA:AMI | 90  | 564 |
| DES:SER | 175 | 854  | DES:SER / PLA:DES | 94  | 664 | DES:SER / PLA:AGO / PLA:AMI | 99  | 630 |
| DES:TRA | 75  | 796  | DES:TRA / PLA:TRA | 70  | 480 | DES:TRA / PLA:AGO / PLA:AMI | 87  | 519 |
| DES:VEN | 157 | 890  | DES:VEN / PLA:DES | 78  | 540 | DES:VEN / PLA:AGO / PLA:AMI | 90  | 558 |
| DES:VIL | 193 | 734  | DES:VIL / PLA:VIL | 84  | 604 | DES:VIL / PLA:AGO / PLA:AMI | 93  | 588 |
| DES:VOR | 165 | 733  | DES:VOR / PLA:DES | 94  | 678 | DES:VOR / PLA:AGO / PLA:AMI | 99  | 633 |
| DUL:ESC |     |      |                   |     |     |                             |     |     |
| DUL:FLO |     |      |                   |     |     |                             |     |     |
| DUL:FLV | 264 | 850  | DUL:FLV / PLA:FLV | 82  | 568 | DUL:FLV / PLA:AGO / PLA:AMI | 90  | 564 |
| DUL:LEV | 215 | 693  | DUL:LEV / PLA:LEV | 74  | 502 | DUL:LEV / PLA:AGO / PLA:AMI | 87  | 540 |
| DUL:MIL |     |      |                   |     |     |                             |     |     |
| DUL:MIR | 158 | 824  | DUL:MIR / PLA:MIR | 100 | 708 | DUL:MIR / PLA:AGO / PLA:AMI | 99  | 654 |
| DUL:NEF | 197 | 708  | DUL:NEF / PLA:NEF | 80  | 570 | DUL:NEF / PLA:AGO / PLA:AMI | 93  | 576 |
| DUL:PAR | 212 | 992  | DUL:PAR / DUL:FLO | 148 | 866 | DUL:PAR / PLA:AGO / PLA:AMI | 123 | 849 |
| DUL:REB | 271 | 860  | DUL:REB / PLA:REB | 106 | 714 | DUL:REB / PLA:AGO / PLA:AMI | 102 | 666 |
| DUL:SER | 295 | 919  | DUL:SER / SER:VOR | 154 | 830 | DUL:SER / PLA:AGO / PLA:AMI | 117 | 801 |
| DUL:TRA | 230 | 803  | DUL:TRA / PLA:TRA | 86  | 620 | DUL:TRA / PLA:AGO / PLA:AMI | 96  | 606 |
| DUL:VEN | 316 | 1014 | DUL:VEN / DUL:FLO | 158 | 832 | DUL:VEN / PLA:AGO / PLA:AMI | 120 | 813 |
| DUL:VIL | 229 | 722  | DUL:VIL / PLA:VIL | 70  | 466 | DUL:VIL / PLA:AGO / PLA:AMI | 87  | 516 |
| DUL:VOR |     |      |                   |     |     |                             |     |     |
| ESC:FLO | 312 | 982  | ESC:FLO / ESC:VEN | 176 | 864 | ESC:FLO / AGO:DUL / AGO:VEN | 126 | 876 |
| ESC:FLV |     |      |                   |     |     |                             |     |     |
| ESC:LEV | 87  | 769  | ESC:LEV / LEV:VOR | 104 | 776 | ESC:LEV / AGO:FLO / AGO:VOR | 105 | 723 |
| ESC:MIL | 232 | 728  | ESC:MIL / PLA:MIL | 100 | 694 | ESC:MIL / AGO:FLO / AGO:VOR | 99  | 657 |
| ESC:MIR | 153 | 929  | ESC:MIR / AMI:ESC | 154 | 898 | ESC:MIR / AGO:FLO / AGO:VOR | 120 | 837 |
| ESC:NEF | 178 | 801  | ESC:NEF / PLA:NEF | 92  | 654 | ESC:NEF / PLA:AGO / PLA:AMI | 96  | 627 |
| ESC:PAR |     |      |                   |     |     |                             |     |     |
| ESC:REB |     |      |                   |     |     |                             |     |     |
| ESC:SER |     |      |                   |     |     |                             |     |     |
| ESC:TRA |     |      |                   |     |     |                             |     |     |
| ESC:VEN |     |      |                   |     |     |                             |     |     |
| ESC:VIL | 74  | 806  | ESC:VIL / PLA:VIL | 82  | 604 | ESC:VIL / PLA:AGO / PLA:AMI | 96  | 603 |
| ESC:VOR | 267 | 835  | ESC:VOR / FLO:VOR | 158 | 842 | ESC:VOR / PLA:BUP / PLA:CIT | 117 | 810 |
| FLO:FLV |     |      |                   |     |     |                             |     |     |
| FLO:LEV | 73  | 791  | FLO:LEV / LEV:PAR | 88  | 666 | FLO:LEV / AGO:FLV / AGO:VOR | 99  | 657 |
| FLO:MIL | 243 | 765  | FLO:MIL / PLA:MIL | 90  | 636 | FLO:MIL / PLA:AGO / PLA:AMI | 96  | 621 |
| FLO:MIR | 60  | 1049 | FLO:MIR / MIR:SER | 82  | 878 | FLO:MIR / AGO:DES / AGO:SER | 111 | 795 |
| FLO:NEF | 140 | 838  | FLO:NEF / AMI:NEF | 80  | 622 | FLO:NEF / PLA:CLO / PLA:DES | 96  | 630 |

|         |     |      |                   |     |     |                             |         |
|---------|-----|------|-------------------|-----|-----|-----------------------------|---------|
| FLO:PAR |     |      |                   |     |     |                             |         |
| FLO:REB |     |      |                   |     |     |                             |         |
| FLO:SER |     |      |                   |     |     |                             |         |
| FLO:TRA |     |      |                   |     |     |                             |         |
| FLO:VEN |     |      |                   |     |     |                             |         |
| FLO:VIL | 59  | 834  | FLO:VIL / PAR:VIL | 88  | 668 | FLO:VIL / AGO:FLV / AGO:VOR | 102 666 |
| FLO:VOR | 285 | 905  | FLO:VOR / PAR:VOR | 166 | 852 | FLO:VOR / AGO:CIT / AGO:REB | 126 864 |
| FLV:LEV | 188 | 645  | FLV:LEV / LEV:PAR | 96  | 692 | FLV:LEV / AGO:LEV / AGO:VOR | 99 642  |
| FLV:MIL |     |      |                   |     |     |                             |         |
| FLV:MIR | 125 | 741  | FLV:MIR / FLO:FLV | 154 | 888 | FLV:MIR / AGO:LEV / AGO:VOR | 120 843 |
| FLV:NEF | 143 | 645  | FLV:NEF / AMI:NEF | 114 | 752 | FLV:NEF / AGO:LEV / AGO:VOR | 102 681 |
| FLV:PAR | 78  | 791  | FLV:PAR / FLO:FLV | 122 | 840 | FLV:PAR / AGO:LEV / AGO:VOR | 117 816 |
| FLV:REB | 249 | 768  | FLV:REB / PLA:FLV | 104 | 704 | FLV:REB / PLA:AGO / PLA:AMI | 99 642  |
| FLV:SER | 203 | 779  | FLV:SER / FLV:VEN | 158 | 928 | FLV:SER / AGO:LEV / AGO:VOR | 126 897 |
| FLV:TRA | 233 | 742  | FLV:TRA / PLA:TRA | 100 | 698 | FLV:TRA / AGO:DUL / AGO:TRA | 99 642  |
| FLV:VEN | 242 | 828  | FLV:VEN / FLO:FLV | 148 | 834 | FLV:VEN / AGO:LEV / AGO:VOR | 120 825 |
| FLV:VIL | 198 | 670  | FLV:VIL / PLA:VIL | 86  | 612 | FLV:VIL / PLA:AGO / PLA:AMI | 93 591  |
| FLV:VOR |     |      |                   |     |     |                             |         |
| LEV:MIL | 83  | 521  | LEV:MIL / PLA:LEV | 78  | 550 | LEV:MIL / PLA:AGO / PLA:AMI | 90 558  |
| LEV:MIR | 163 | 630  | LEV:MIR / LEV:PAR | 98  | 706 | LEV:MIR / AGO:MIL / AGO:VOR | 102 663 |
| LEV:NEF | 155 | 595  | LEV:NEF / LEV:PAR | 94  | 676 | LEV:NEF / AGO:MIL / AGO:VOR | 96 624  |
| LEV:PAR | 193 | 671  | LEV:PAR / PLA:LEV | 80  | 566 | LEV:PAR / PLA:AGO / PLA:AMI | 93 579  |
| LEV:REB | 208 | 687  | LEV:REB / LEV:PAR | 88  | 636 | LEV:REB / AGO:MIL / AGO:VOR | 96 615  |
| LEV:SER | 212 | 687  | LEV:SER / FLO:LEV | 90  | 648 | LEV:SER / AGO:MIL / AGO:VOR | 96 627  |
| LEV:TRA | 194 | 681  | LEV:TRA / LEV:PAR | 88  | 642 | LEV:TRA / AGO:MIL / AGO:VOR | 96 609  |
| LEV:VEN | 219 | 700  | LEV:VEN / FLO:LEV | 100 | 702 | LEV:VEN / AGO:MIL / AGO:VOR | 102 666 |
| LEV:VIL | 177 | 623  | LEV:VIL / LEV:PAR | 94  | 670 | LEV:VIL / AGO:MIL / AGO:VOR | 96 615  |
| LEV:VOR | 69  | 604  | LEV:VOR / DUL:LEV | 86  | 652 | LEV:VOR / AGO:LEV / AGO:VOR | 99 645  |
| MIL:MIR | 188 | 789  | MIL:MIR / MIL:VEN | 106 | 740 | MIL:MIR / AGO:MIR / AGO:VOR | 105 687 |
| MIL:NEF | 178 | 731  | MIL:NEF / MIL:PAR | 100 | 710 | MIL:NEF / AGO:MIR / AGO:VOR | 99 642  |
| MIL:PAR | 89  | 861  | MIL:PAR / PLA:MIL | 80  | 574 | MIL:PAR / PLA:AGO / PLA:AMI | 93 597  |
| MIL:REB |     |      |                   |     |     |                             |         |
| MIL:SER |     |      |                   |     |     |                             |         |
| MIL:TRA |     |      |                   |     |     |                             |         |
| MIL:VEN |     |      |                   |     |     |                             |         |
| MIL:VIL | 110 | 739  | MIL:VIL / PLA:VIL | 68  | 444 | MIL:VIL / PLA:AGO / PLA:AMI | 84 495  |
| MIL:VOR | 225 | 714  | MIL:VOR / PLA:MIL | 80  | 562 | MIL:VOR / PLA:AGO / PLA:AMI | 90 564  |
| MIR:NEF | 240 | 750  | MIR:NEF / PLA:NEF | 68  | 446 | MIR:NEF / PLA:AGO / PLA:AMI | 84 501  |
| MIR:PAR | 306 | 1017 | MIR:PAR / PLA:MIR | 84  | 584 | MIR:PAR / PLA:AGO / PLA:AMI | 93 579  |
| MIR:REB | 113 | 889  | MIR:REB / PLA:REB | 90  | 640 | MIR:REB / PLA:AGO / PLA:AMI | 96 606  |
| MIR:SER | 298 | 954  | MIR:SER / PLA:MIR | 108 | 704 | MIR:SER / PLA:AGO / PLA:AMI | 99 642  |
| MIR:TRA | 40  | 792  | MIR:TRA / PLA:TRA | 64  | 414 | MIR:TRA / PLA:AGO / PLA:AMI | 84 492  |





**Figure 3b: Sensitivity analysis effect size:  $f_{xy}$ .** Line represent median conditional power across all comparisons with inconclusive evidence, estimated in dependence on different anticipated alternative effect sizes ( $f_{xy} = 0.01, 0.1, 0.2, 0.3, 0.5, 0.8$ ) in terms of Cohen's d (small effect  $d = 0.2$ , moderate effect  $d = 0.5$ , large effect  $d = 0.8$ ) [22]. Thick lines indicate conditional power estimated at the network estimates ( $f_{xyN}$ ). Horizontal red dashed lines indicate 20% and 80% conditional power conventionally at which sample sizes ( $N_{CP=20\%}, N_{CP=80\%}$ ) were estimated.

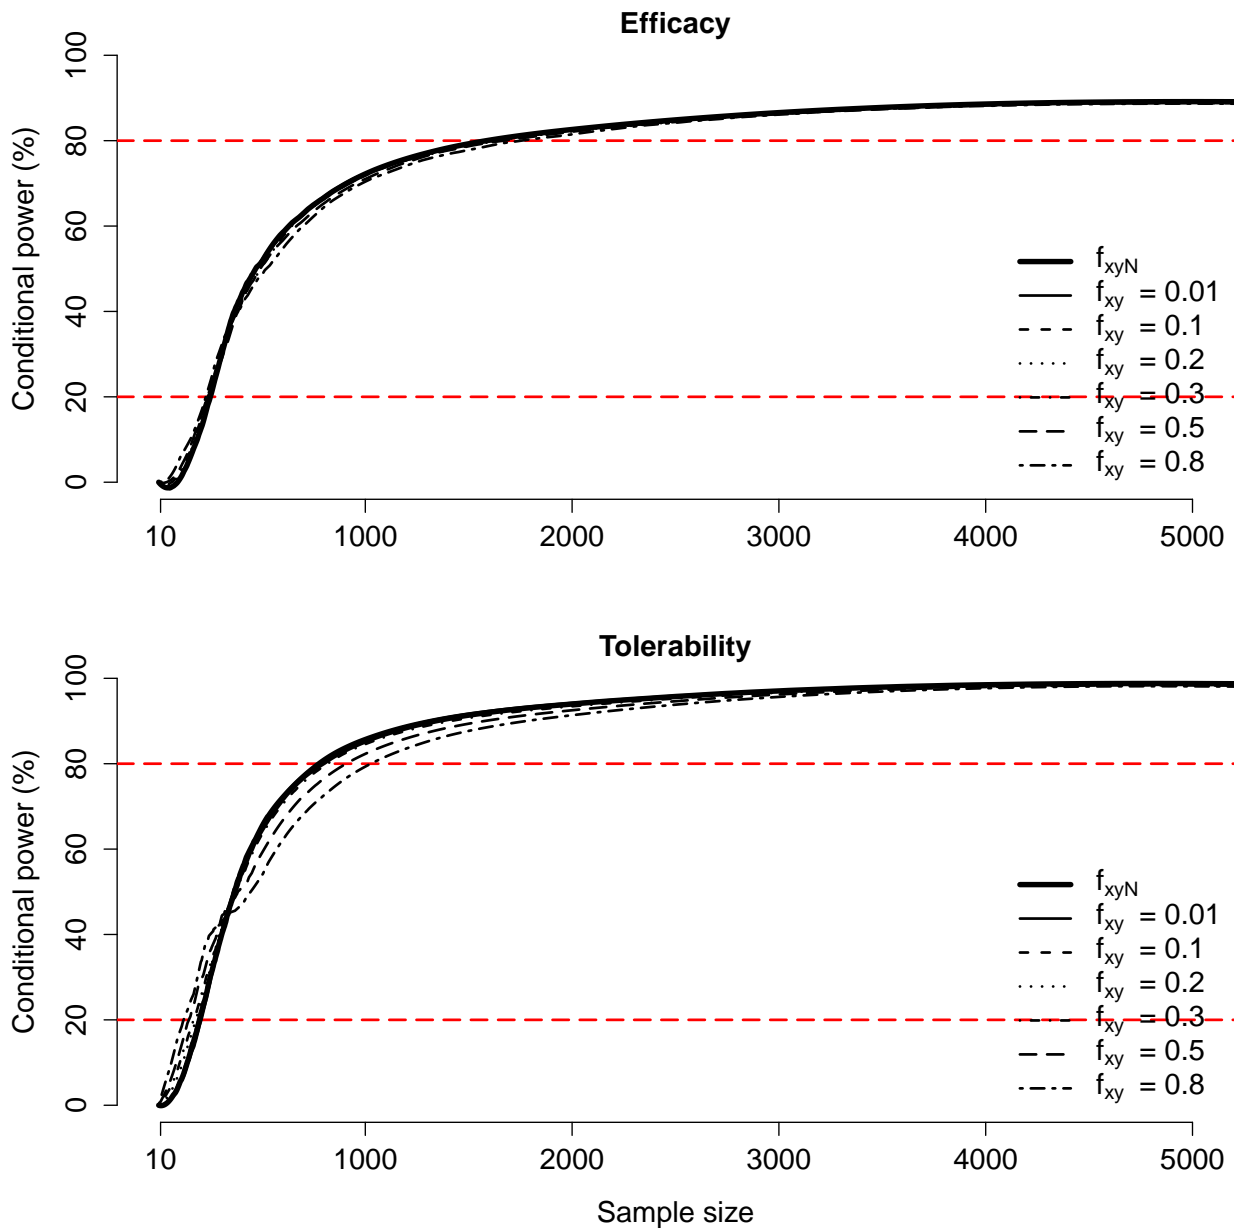

**Figure 3c: Sensitivity analysis event probability:  $p_c$ .** Lines represent median conditional power across all comparisons with inconclusive evidence, estimated in dependence on different anticipated alternative event probabilities ( $p_c = 0.01, 0.1, 0.2, 0.3, 0.5$ ). Thick lines indicate conditional power estimated at the average network event probability ( $p_{cN}$ ). Horizontal red dashed lines indicate 20% and 80% conditional power conventionally at which sample sizes ( $N_{CP=20\%}, N_{CP=80\%}$ ) were estimated.

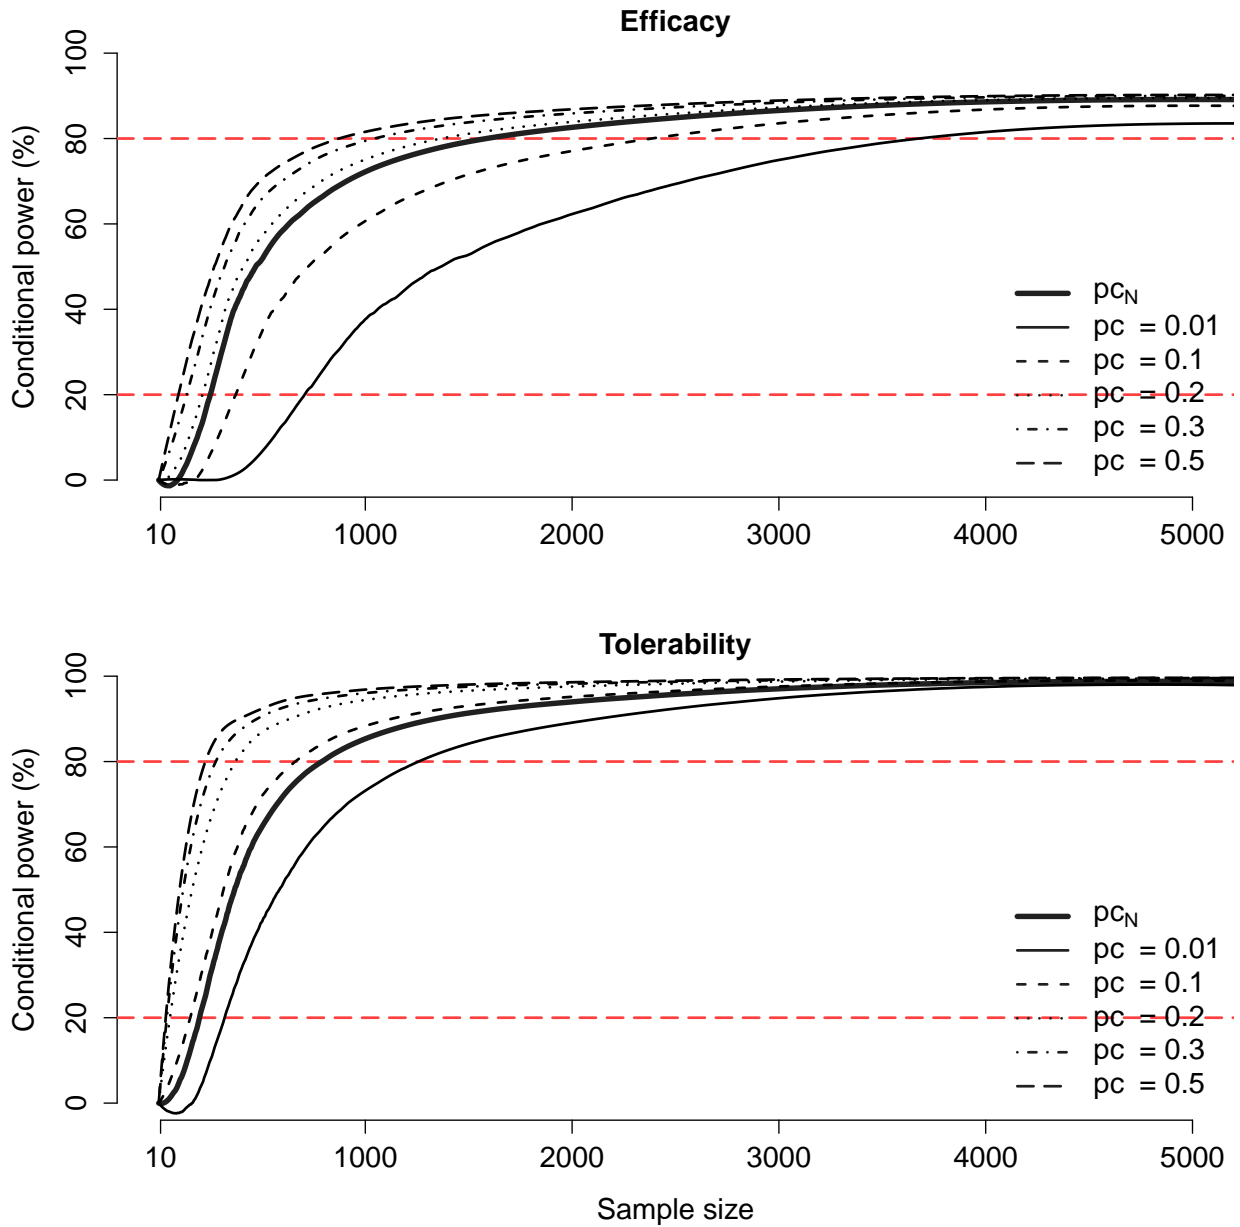

## 4 List of included studies

**Table 4: List of included studies.** List of 502 studies of the antidepressant network included in the present analysis, for which information was available on at least one of the primary outcomes, efficacy (438 trials) and/or tolerability (438 trials). Studies are sorted by study year of completion from 1977 - 2017.

| ID | Year | Study                   | Comparison  | Efficacy | Tolerability |
|----|------|-------------------------|-------------|----------|--------------|
| 1  | 1977 | Feighner1979            | PLA:AMI     | x        | x            |
| 2  | 1977 | Kellams1979             | PLA:TRA     | -        | x            |
| 3  | 1978 | Feighner1980            | PLA:TRA     | x        | -            |
| 4  | 1979 | Georgotas1982           | PLA:AMI     | x        | -            |
| 5  | 1979 | Mann1981                | PLA:TRA     | x        | -            |
| 6  | 1979 | Raft1981                | PLA:AMI     | -        | x            |
| 7  | 1979 | Shipley1981             | PLA:AMI     | x        | -            |
| 8  | 1980 | GSK14                   | PLA:BUP     | x        | x            |
| 9  | 1980 | Rickels1982             | PLA:AMI:TRA | x        | -            |
| 10 | 1980 | Roffman1982             | PLA:AMI     | x        | x            |
| 11 | 1980 | Thomson1982             | PLA:AMI     | -        | x            |
| 12 | 1981 | Chouinard1983a          | AMI:BUP     | -        | x            |
| 13 | 1981 | Claghorn1983            | PLA:AMI     | x        | x            |
| 14 | 1981 | DeWilde1983a            | CLO:FLV     | x        | x            |
| 15 | 1981 | Itil1983                | PLA:FLV     | -        | x            |
| 16 | 1981 | Kane1983                | PLA:BUP     | -        | x            |
| 17 | 1982 | Amin1984                | PLA:FLV     | x        | -            |
| 18 | 1982 | Feighner1984            | PLA:BUP     | x        | x            |
| 19 | 1982 | Norton1984              | PLA:FLV     | x        | x            |
| 20 | 1983 | Battegay1985            | AMI:PAR     | -        | x            |
| 21 | 1983 | Chouinard1985           | AMI:FLO     | x        | x            |
| 22 | 1983 | Cohn1985a               | PLA:FLO     | x        | x            |
| 23 | 1983 | Dominguez1985           | PLA:FLV     | -        | x            |
| 24 | 1983 | Hormazabal1985          | PLA:AMI     | x        | x            |
| 25 | 1983 | Masco1985               | AMI:FLO     | x        | x            |
| 26 | 1983 | PAR29060.308(HP/81/74A) | AMI:PAR     | -        | x            |
| 27 | 1983 | PAR29060.316(HP/82/47A) | AMI:PAR     | -        | x            |
| 28 | 1983 | PAR29060.318(HP/82/64A) | AMI:PAR     | -        | x            |
| 29 | 1983 | Rickels1985             | PLA:AMI     | x        | x            |
| 30 | 1984 | Andersen1986            | CIT:CLO     | x        | x            |
| 31 | 1984 | Brown1986               | PLA:FLV     | -        | x            |
| 32 | 1984 | Cassano1986             | PLA:FLV     | x        | x            |
| 33 | 1984 | Edwards1989             | PLA:PAR     | x        | x            |
| 34 | 1984 | MDUK/26090/III/83/007   | PLA:PAR     | -        | x            |
| 35 | 1984 | PAR29060.310(HP81/85A)  | AMI:PAR     | -        | x            |

|    |      |                        |             |   |   |
|----|------|------------------------|-------------|---|---|
| 36 | 1984 | PAR29060.314(HP82/134) | AMI:PAR     | - | x |
| 37 | 1984 | Shaw1986               | AMI:CIT     | x | x |
| 38 | 1985 | Amsterdam1986          | PLA:AMI     | x | x |
| 39 | 1985 | Lapierre1987           | PLA:FLV     | - | x |
| 40 | 1985 | MIR003-003             | PLA:MIR     | x | x |
| 41 | 1985 | PAR01001               | PLA:PAR     | x | x |
| 42 | 1985 | PAR29060/281           | AMI:PAR     | x | x |
| 43 | 1985 | Stark1985              | PLA:FLO     | x | x |
| 44 | 1985 | Study19                | PLA:FLO     | x | x |
| 45 | 1985 | Study25                | PLA:FLO     | x | x |
| 46 | 1985 | Study62a               | PLA:FLO     | x | x |
| 47 | 1985 | Study62b               | PLA:FLO     | x | x |
| 48 | 1985 | Young1987              | AMI:FLO     | - | x |
| 49 | 1986 | Blacker1988            | AMI:TRA     | - | x |
| 50 | 1986 | Byerley1988            | PLA:FLO     | - | x |
| 51 | 1986 | DeRonchi1998           | AMI:FLO     | x | x |
| 52 | 1986 | Debus1988              | FLO:TRA     | - | x |
| 53 | 1986 | Dunbar1993a            | PLA:PAR     | x | x |
| 54 | 1986 | Dunbar1993b            | PLA:PAR     | x | x |
| 55 | 1986 | Dunbar1993c            | PLA:PAR     | x | x |
| 56 | 1986 | Feighner1993a          | PLA:PAR     | x | x |
| 57 | 1986 | Feighner1993b          | PLA:PAR     | x | x |
| 58 | 1986 | Feighner1993c          | PLA:PAR     | x | x |
| 59 | 1986 | Feighner1993d          | PLA:PAR     | x | x |
| 60 | 1986 | Feighner1993e          | PLA:PAR     | x | x |
| 61 | 1986 | Feighner1993f          | PLA:PAR     | x | x |
| 62 | 1986 | Hicks1988              | PLA:AMI     | - | x |
| 63 | 1986 | Laakman1988            | AMI:FLO     | x | - |
| 64 | 1986 | PARMDUK032             | AMI:PAR     | x | x |
| 65 | 1986 | Paykel1988             | PLA:AMI     | x | - |
| 66 | 1986 | Upward1988             | AMI:FLO     | - | x |
| 67 | 1987 | 2906007001             | PLA:AMI:PAR | x | x |
| 68 | 1987 | Altamura1989b          | AMI:TRA     | x | x |
| 69 | 1987 | Ansseau1989a           | AMI:MIL     | x | - |
| 70 | 1987 | Ansseau1989b           | AMI:MIL     | x | x |
| 71 | 1987 | Dunbar1993d            | PLA:PAR     | x | x |
| 72 | 1987 | Falk1989               | FLO:TRA     | x | x |
| 73 | 1987 | Fawcett1989            | AMI:FLO     | x | x |
| 74 | 1987 | Feighner1989a          | PLA:FLO     | x | x |
| 75 | 1987 | Feighner1989b          | PLA:FLV     | x | x |
| 76 | 1987 | Ginestet1989           | CLO:FLO     | x | - |
| 77 | 1987 | Guillibert1989         | CLO:PAR     | x | x |
| 78 | 1987 | Kuhs1989               | AMI:PAR     | x | - |

|     |      |                         |             |   |   |
|-----|------|-------------------------|-------------|---|---|
| 79  | 1987 | Larsen1989              | PLA:CLO     | x | x |
| 80  | 1987 | Lydiard1989             | PLA:FLV     | - | x |
| 81  | 1987 | Manna1989               | CLO:FLO     | x | - |
| 82  | 1987 | Ropert1989              | CLO:FLO     | - | x |
| 83  | 1988 | Cohn1990                | AMI:SER     | x | x |
| 84  | 1988 | DUAG1990                | CLO:PAR     | x | x |
| 85  | 1988 | Gelenberg1990           | PLA:AMI     | - | x |
| 86  | 1988 | Lineberry1990           | PLA:BUP     | x | x |
| 87  | 1988 | MIR84062                | PLA:AMI:MIR | x | - |
| 88  | 1988 | March1990               | PLA:FLV     | - | x |
| 89  | 1988 | Miller1989              | PLA:PAR     | x | - |
| 90  | 1988 | Roth1990                | PLA:FLV     | x | - |
| 91  | 1988 | Smith1990               | PLA:AMI:MIR | x | x |
| 92  | 1989 | Ansseau1991             | FLV:MIL     | x | x |
| 93  | 1989 | Beasley1991             | FLO:TRA     | x | x |
| 94  | 1989 | Bhatia1991              | PLA:AMI     | - | x |
| 95  | 1989 | Carman1991              | PLA:AMI     | x | - |
| 96  | 1989 | Feighner1991            | BUP:FLO     | x | - |
| 97  | 1989 | Harris1991              | AMI:FLV     | - | x |
| 98  | 1989 | Keegan1991              | AMI:FLO     | - | x |
| 99  | 1989 | MDF/29060/III/070/88/MC | CLO:PAR     | x | x |
| 100 | 1989 | Noguera1991             | CLO:FLO     | x | x |
| 101 | 1989 | PAR279MDUK              | PLA:PAR     | x | x |
| 102 | 1989 | PZ/109                  | PLA:SER     | x | - |
| 103 | 1989 | Preskorn1991            | AMI:FLO     | x | x |
| 104 | 1989 | Rouillon1991            | CLO:PAR     | x | x |
| 105 | 1989 | SER315                  | PLA:AMI:SER | x | x |
| 106 | 1990 | 003-008                 | PLA:MIR     | x | x |
| 107 | 1990 | 03A0A-004A              | PLA:NEF     | x | x |
| 108 | 1990 | Bakish1992              | PLA:AMI     | - | x |
| 109 | 1990 | Bignamini1992           | AMI:PAR     | x | x |
| 110 | 1990 | CN104-002               | PLA:NEF     | x | x |
| 111 | 1990 | Claghorn/1992           | PLA:PAR     | x | x |
| 112 | 1990 | D'Amico1990             | PLA:NEF     | x | x |
| 113 | 1990 | Hutchinson1992          | AMI:PAR     | - | x |
| 114 | 1990 | MIR003-020              | PLA:AMI:MIR | x | x |
| 115 | 1990 | MIR003-021              | PLA:AMI:MIR | x | x |
| 116 | 1990 | PZ/111                  | PLA:FLO:SER | x | - |
| 117 | 1990 | Reimherr1990            | PLA:AMI:SER | x | x |
| 118 | 1990 | Rickels/1992            | PLA:PAR     | x | x |
| 119 | 1990 | Smith/1992              | PLA:PAR     | x | x |
| 120 | 1991 | 0600A-326               | CLO:VEN     | - | x |
| 121 | 1991 | Aguglia1993             | FLO:SER     | x | x |

|     |      |                        |             |   |   |
|-----|------|------------------------|-------------|---|---|
| 122 | 1991 | Ban1998                | PLA:REB     | x | x |
| 123 | 1991 | DeWilde1993            | FLO:PAR     | x | x |
| 124 | 1991 | Gagiano1993            | FLO:PAR     | x | x |
| 125 | 1991 | Judd1993               | AMI:FLO     | - | x |
| 126 | 1991 | Katz1993a              | PLA:AMI     | x | - |
| 127 | 1991 | Katz1993b              | PLA:AMI     | x | - |
| 128 | 1991 | MY-1008/CPMS-076       | PLA:PAR     | - | x |
| 129 | 1991 | MY-1043/BRL-029060/115 | PLA:FLO:PAR | x | x |
| 130 | 1991 | MY-1045/BRL-029060/1   | PLA:FLO:PAR | x | x |
| 131 | 1991 | Moller1993             | AMI:PAR     | x | x |
| 132 | 1991 | Pelicier1993           | CLO:PAR     | x | x |
| 133 | 1991 | Reimherr1998           | PLA:BUP     | x | x |
| 134 | 1991 | Schoene1993            | FLO:PAR     | x | x |
| 135 | 1991 | Tignol1993             | FLO:PAR     | x | x |
| 136 | 1991 | Timmerman1993          | CIT:FLV     | x | x |
| 137 | 1991 | VEN600A-303            | PLA:VEN     | x | x |
| 138 | 1991 | VEN600A-313            | PLA:VEN     | x | x |
| 139 | 1992 | 0600A-332              | FLO:VEN     | - | x |
| 140 | 1992 | Ansseau1994a           | FLV:PAR     | x | x |
| 141 | 1992 | Ansseau1994b           | FLO:MIL     | - | x |
| 142 | 1992 | Ansseau1994c           | AMI:NEF     | x | x |
| 143 | 1992 | Bersani1994            | AMI:SER     | x | x |
| 144 | 1992 | Clerc1994              | FLO:VEN     | x | x |
| 145 | 1992 | Doogan1994             | PLA:SER     | x | - |
| 146 | 1992 | Dunner1992             | PLA:PAR     | x | x |
| 147 | 1992 | Heiligenstein1994      | PLA:FLO     | x | x |
| 148 | 1992 | Montgomery1992         | PLA:CIT     | x | x |
| 149 | 1992 | Moon1994               | CLO:SER     | x | x |
| 150 | 1992 | Ontiveros1994          | FLO:PAR     | x | x |
| 151 | 1992 | Remick1994             | AMI:FLV     | - | x |
| 152 | 1992 | Vartiainen1994         | PLA:MIR     | x | x |
| 153 | 1992 | Weisler1994            | BUP:TRA     | x | x |
| 154 | 1992 | Wilcox1994             | PLA:AMI     | x | x |
| 155 | 1993 | Bennie1995             | FLO:SER     | x | - |
| 156 | 1993 | Faber1995              | PLA:SER     | x | x |
| 157 | 1993 | Geretsegger1995        | AMI:PAR     | x | x |
| 158 | 1993 | Lam1995                | PLA:FLO     | x | x |
| 159 | 1993 | MY-1042/CPMS-251       | PLA:PAR     | x | x |
| 160 | 1993 | Mynors-Wallis1995      | PLA:AMI     | x | x |
| 161 | 1993 | Nemeroff1995           | FLV:SER     | x | x |
| 162 | 1993 | Ottevanger1995         | CLO:FLV     | x | x |
| 163 | 1993 | Ravindran1995          | PLA:SER     | - | x |
| 164 | 1993 | Settle1999             | PLA:BUP     | x | x |

|     |      |                  |             |   |   |
|-----|------|------------------|-------------|---|---|
| 165 | 1993 | Sramek1995       | PLA:FLO     | x | x |
| 166 | 1993 | Staner1995       | AMI:PAR     | x | x |
| 167 | 1993 | Study205         | PLA:BUP     | x | x |
| 168 | 1993 | Tollefson1995    | PLA:FLO     | x | x |
| 169 | 1993 | vanMoffaert1995a | FLO:SER     | x | - |
| 170 | 1993 | vanMoffaert1995b | MIR:TRA     | x | x |
| 171 | 1994 | 29060/356        | FLO:PAR     | x | x |
| 172 | 1994 | Baldwin1996      | NEF:PAR     | x | x |
| 173 | 1994 | Christiansen1996 | AMI:PAR     | x | x |
| 174 | 1994 | Claghorn1996     | PLA:FLV     | x | x |
| 175 | 1994 | Cunningham1994   | PLA:TRA:VEN | x | x |
| 176 | 1994 | Dierick1996      | FLO:VEN     | x | x |
| 177 | 1994 | Fabre1996        | PLA:FLV     | x | x |
| 178 | 1994 | Fava1998         | PLA:FLO:PAR | x | x |
| 179 | 1994 | Feiger1996       | NEF:SER     | x | x |
| 180 | 1994 | Fontaine1994     | PLA:NEF     | x | x |
| 181 | 1994 | Hoyberg1996      | AMI:MIR     | x | x |
| 182 | 1994 | Mullin1996       | AMI:MIR     | x | x |
| 183 | 1994 | Patris1996       | CIT:FLO     | x | x |
| 184 | 1994 | Rapaport1996     | FLO:FLV     | x | x |
| 185 | 1994 | Rickels1994      | PLA:NEF     | x | x |
| 186 | 1994 | SER-CHN-1        | AMI:PAR     | x | x |
| 187 | 1994 | Schweizer1994    | PLA:VEN     | x | x |
| 188 | 1994 | Walczak1996      | PLA:FLV     | - | x |
| 189 | 1995 | 29060/299        | AMI:PAR     | x | x |
| 190 | 1995 | 845              | PLA:BUP     | x | x |
| 191 | 1995 | Armitage1997     | FLO:NEF     | x | x |
| 192 | 1995 | Berlanga1997     | FLO:NEF     | x | x |
| 193 | 1995 | Bosc1997a        | PLA:FLO:REB | x | x |
| 194 | 1995 | Bosc1997b        | FLO:REB     | x | x |
| 195 | 1995 | Bougerol1997     | CIT:FLO     | x | x |
| 196 | 1995 | Bremner1995      | PLA:AMI:MIR | x | x |
| 197 | 1995 | Buchsbaum1997    | PLA:SER     | x | - |
| 198 | 1995 | Claghorn1995     | PLA:MIR     | x | x |
| 199 | 1995 | Ekselius1997     | CIT:SER     | x | - |
| 200 | 1995 | Gillin1997       | FLO:NEF     | x | x |
| 201 | 1995 | Guelfi1995       | PLA:VEN     | x | x |
| 202 | 1995 | Halikas1995      | PLA:MIR:TRA | x | x |
| 203 | 1995 | Kavoussi1997     | BUP:SER     | x | - |
| 204 | 1995 | Kiev1997         | FLV:PAR     | x | x |
| 205 | 1995 | Lecrubier1997    | PLA:VEN     | x | x |
| 206 | 1995 | Leinonen1997     | CLO:MIL     | x | x |
| 207 | 1995 | Lydiard1997      | PLA:AMI:SER | x | x |

|     |      |                      |             |   |   |
|-----|------|----------------------|-------------|---|---|
| 208 | 1995 | Mendels1995          | PLA:NEF     | x | x |
| 209 | 1995 | Olie1997             | PLA:SER     | x | x |
| 210 | 1995 | Ravindran1997        | CLO:PAR     | x | x |
| 211 | 1995 | Rickels1995          | PLA:NEF     | x | x |
| 212 | 1995 | Study015             | PLA:REB     | x | x |
| 213 | 1995 | Study032a            | PLA:REB     | x | x |
| 214 | 1995 | Tylee1997            | FLO:VEN     | - | x |
| 215 | 1995 | VENXR367             | PLA:PAR:VEN | x | x |
| 216 | 1995 | WELL029              | PLA:BUP     | x | - |
| 217 | 1995 | WELLAK1A4006         | PLA:BUP:FLO | x | x |
| 218 | 1995 | Wellbutrin06         | PLA:BUP     | x | x |
| 219 | 1995 | Wellbutrin25         | PLA:BUP     | x | x |
| 220 | 1995 | Zivkov1995           | AMI:MIR     | x | x |
| 221 | 1996 | 003-042              | PLA:MIR     | x | x |
| 222 | 1996 | 003-048              | PLA:FLO:MIR | x | x |
| 223 | 1996 | 0600B1-367           | PAR:VEN     | - | x |
| 224 | 1996 | Cohn1996             | PLA:NEF     | x | x |
| 225 | 1996 | Costaesilva1998      | FLO:VEN     | x | x |
| 226 | 1996 | Demyttenaere1998     | AMI:FLO     | x | x |
| 227 | 1996 | E-1569               | MIR:PAR     | x | x |
| 228 | 1996 | Feighner1998         | PLA:NEF     | x | x |
| 229 | 1996 | Guelfi1998           | FLO:MIL     | x | x |
| 230 | 1996 | Hackett1998          | FLV:VEN     | x | - |
| 231 | 1996 | Khan1998             | PLA:VEN     | x | x |
| 232 | 1996 | Kramer1998           | PLA:PAR     | x | x |
| 233 | 1996 | Kyle1998             | AMI:CIT     | x | x |
| 234 | 1996 | Marchesi1998         | AMI:FLO     | x | x |
| 235 | 1996 | McPartlin1998        | PAR:VEN     | x | x |
| 236 | 1996 | Moller1998           | AMI:SER     | x | x |
| 237 | 1996 | Murasaki1998         | AMI:FLV     | x | x |
| 238 | 1996 | OntiverosSanchez1998 | AMI:FLO     | x | x |
| 239 | 1996 | Samuelian1998        | CLO:VEN     | x | x |
| 240 | 1996 | Studie009            | PLA:REB     | x | x |
| 241 | 1996 | Study89306           | PLA:CIT     | x | - |
| 242 | 1996 | Wheatley1998         | FLO:MIR     | x | x |
| 243 | 1997 | 0600A1-372           | FLO:VEN     | - | x |
| 244 | 1997 | Alves1999            | FLO:VEN     | x | x |
| 245 | 1997 | Chouinard1999        | FLO:PAR     | x | x |
| 246 | 1997 | Cunningham1997       | PLA:VEN     | x | x |
| 247 | 1997 | Golden2002a          | PLA:PAR     | x | x |
| 248 | 1997 | Golden2002b          | PLA:PAR     | x | x |
| 249 | 1997 | Leinonen1999         | CIT:MIR     | x | x |
| 250 | 1997 | Rapaport2003         | PLA:PAR     | x | x |



|     |      |                  |             |   |   |
|-----|------|------------------|-------------|---|---|
| 251 | 1997 | Rudolph1999      | PLA:FLO:VEN | x | x |
| 252 | 1997 | Silverstone1999  | PLA:FLO:VEN | x | x |
| 253 | 1997 | Thase1997        | PLA:VEN     | x | x |
| 254 | 1997 | Versiani1999     | AMI:FLO     | x | x |
| 255 | 1998 | Aberg-Wisted2000 | PAR:SER     | x | - |
| 256 | 1998 | Benkert2000      | MIR:PAR     | x | x |
| 257 | 1998 | Coleman1999      | PLA:BUP:SER | x | x |
| 258 | 1998 | Corrigan2000     | PLA:FLO     | - | x |
| 259 | 1998 | Croft1999        | PLA:BUP:SER | x | x |
| 260 | 1998 | Gentil2000       | AMI:VEN     | x | x |
| 261 | 1998 | Lepine2000       | CLO:SER     | x | x |
| 262 | 1998 | McGrath2000      | PLA:FLO     | x | - |
| 263 | 1998 | Mehtonen2000     | SER:VEN     | - | x |
| 264 | 1998 | Miura2000        | AMI:PAR     | x | x |
| 265 | 1998 | Moller2000       | AMI:SER     | x | x |
| 266 | 1998 | Newhouse2000     | FLO:SER     | x | x |
| 267 | 1998 | Rudolph1998      | PLA:VEN     | x | x |
| 268 | 1998 | Schneider2003    | PLA:SER     | x | x |
| 269 | 1998 | Stahl2000        | PLA:CIT:SER | x | x |
| 270 | 1998 | Tsutsui2000      | PAR:TRA     | x | x |
| 271 | 1998 | Tzanakaki2000    | FLO:VEN     | x | x |
| 272 | 1998 | Versiani2000     | PLA:REB     | x | x |
| 273 | 1999 | Bjerkstedt2005   | PLA:FLO     | x | x |
| 274 | 1999 | CL3-20098-022    | PLA:AGO:FLO | x | x |
| 275 | 1999 | CL3-20098-023    | PLA:AGO:PAR | x | x |
| 276 | 1999 | CL3-20098-026    | PLA:AGO     | x | x |
| 277 | 1999 | Clerc2001        | FLV:MIL     | x | x |
| 278 | 1999 | Feighner1999     | PLA:CIT     | x | x |
| 279 | 1999 | Mendels1999      | PLA:CIT     | x | x |
| 280 | 1999 | Montgomery2004b  | AGO:PAR     | x | x |
| 281 | 1999 | Rush2001         | BUP:SER     | x | - |
| 282 | 1999 | Sheehan2009a     | PLA:FLO:VEN | x | x |
| 283 | 1999 | Study045         | PLA:REB     | x | x |
| 284 | 1999 | Study049         | PLA:REB     | x | x |
| 285 | 2000 | Burke2002        | PLA:CIT:ESC | x | x |
| 286 | 2000 | CL3-20098-024    | PLA:AGO:FLO | x | x |
| 287 | 2000 | Casabona2002     | PAR:VEN     | - | x |
| 288 | 2000 | Cassano2002      | FLO:PAR     | x | - |
| 289 | 2000 | Coleman2001      | PLA:BUP:FLO | x | x |
| 290 | 2000 | Davidson2002     | PLA:SER     | x | x |
| 291 | 2000 | Fava2002         | FLO:PAR:SER | x | x |
| 292 | 2000 | Goldstein2002    | PLA:DUL:FLO | x | x |
| 293 | 2000 | Gorman2002       | PLA:CIT:ESC | x | x |

|     |      |                    |             |   |   |
|-----|------|--------------------|-------------|---|---|
| 294 | 2000 | Hicks2002          | NEF:PAR     | x | x |
| 295 | 2000 | Jefferson2000      | PLA:CIT:PAR | x | x |
| 296 | 2000 | Lepola2003         | PLA:CIT:ESC | x | x |
| 297 | 2000 | Loo2002            | PLA:AGO:PAR | x | x |
| 298 | 2000 | M/2020/0046        | PLA:PAR:REB | x | x |
| 299 | 2000 | M/2020/0047        | PLA:PAR:REB | x | x |
| 300 | 2000 | Murasaki2010a      | FLV:MIR     | x | x |
| 301 | 2000 | Murasaki2010b      | FLV:MIR     | x | x |
| 302 | 2000 | Sacchetti2002      | AMI:PAR     | x | x |
| 303 | 2000 | Schatzberg2002     | MIR:PAR     | x | x |
| 304 | 2000 | Schwartz2002       | REB:VEN     | x | x |
| 305 | 2001 | 0600A-347          | FLV:VEN     | - | x |
| 306 | 2001 | 0600A-349          | PAR:VEN     | - | x |
| 307 | 2001 | Behnke2003         | MIR:SER     | - | x |
| 308 | 2001 | Caligiuri2003      | BUP:SER     | x | - |
| 309 | 2001 | Clayton2003        | PLA:FLO:REB | x | x |
| 310 | 2001 | Dalery2003         | FLO:FLV     | x | - |
| 311 | 2001 | Goldstein2004a     | PLA:DUL:PAR | x | x |
| 312 | 2001 | Goldstein2004b     | PLA:DUL:PAR | x | x |
| 313 | 2001 | Hong2003           | FLO:MIR     | x | x |
| 314 | 2001 | Sauer2003          | AMI:VEN     | x | x |
| 315 | 2001 | Studie032          | FLO:REB     | x | x |
| 316 | 2001 | StudyHMAQ-GroupB   | PLA:DUL:FLO | - | - |
| 317 | 2001 | WELLAK140016       | BUP:PAR     | x | x |
| 318 | 2001 | Winokur2003        | FLO:MIR     | x | x |
| 319 | 2002 | 0600B1-384         | PLA:VEN     | - | x |
| 320 | 2002 | Allard2004         | CIT:VEN     | x | - |
| 321 | 2002 | Bielski2004        | ESC:VEN     | x | x |
| 322 | 2002 | CL3-20098-036      | AGO:VEN     | x | x |
| 323 | 2002 | Detke2002a         | PLA:DUL     | x | x |
| 324 | 2002 | Detke2002b         | PLA:DUL     | x | x |
| 325 | 2002 | Detke2004          | PLA:DUL:PAR | x | x |
| 326 | 2002 | Katz2004           | PLA:PAR     | - | x |
| 327 | 2002 | Lalit2004          | CIT:ESC:SER | x | x |
| 328 | 2002 | Lemoine2007        | AGO:VEN     | x | x |
| 329 | 2002 | LopezRodriguez2004 | PLA:FLO     | x | - |
| 330 | 2002 | Montgomery2004a    | ESC:VEN     | x | x |
| 331 | 2002 | Moscovitch2004     | PLA:SER     | x | x |
| 332 | 2002 | Olie2007           | PLA:AGO     | x | x |
| 333 | 2002 | Roose2004          | PLA:CIT     | x | x |
| 334 | 2002 | Sechter2004        | MIL:PAR     | x | x |
| 335 | 2002 | Tomarken2004       | PLA:BUP     | x | - |
| 336 | 2002 | Trivedi2004        | PLA:PAR     | x | x |

|     |      |                   |             |   |   |
|-----|------|-------------------|-------------|---|---|
| 337 | 2002 | Wade2002          | PLA:ESC     | x | x |
| 338 | 2003 | 0600B1-402        | SER:VEN     | - | x |
| 339 | 2003 | Alexopoulos2004   | PLA:ESC:SER | x | x |
| 340 | 2003 | Amini2005         | FLO:MIR     | - | x |
| 341 | 2003 | Colonna2005       | CIT:ESC     | x | - |
| 342 | 2003 | Fava2005          | PLA:FLO     | x | x |
| 343 | 2003 | Kasper2005a       | PLA:ESC:FLO | x | x |
| 344 | 2003 | Kasper2005b       | PAR:TRA     | x | x |
| 345 | 2003 | Keller2006b       | PLA:PAR     | - | x |
| 346 | 2003 | Keller2006c       | PLA:PAR     | x | x |
| 347 | 2003 | Kennedy2006       | PLA:AGO     | x | x |
| 348 | 2003 | Moore2005         | CIT:ESC     | x | x |
| 349 | 2003 | Moreno2005        | PLA:FLO     | x | - |
| 350 | 2003 | NKD20006          | PLA:PAR     | x | x |
| 351 | 2003 | Ninan2003         | PLA:ESC     | x | x |
| 352 | 2003 | Rossini2005       | FLV:SER     | x | x |
| 353 | 2003 | Sir2005           | SER:VEN     | x | x |
| 354 | 2003 | Versiani2005      | FLO:MIR     | x | x |
| 355 | 2004 | Baldwin2006a      | PAR:REB     | x | x |
| 356 | 2004 | Baldwin2006b      | ESC:PAR     | x | x |
| 357 | 2004 | Benkert2006       | MIR:VEN     | x | x |
| 358 | 2004 | Berlanga2006      | CIT:REB     | x | x |
| 359 | 2004 | Bose2008          | PLA:ESC     | x | x |
| 360 | 2004 | Boulenger2006     | ESC:PAR     | x | - |
| 361 | 2004 | Clayton2006a      | PLA:BUP:ESC | x | x |
| 362 | 2004 | Clayton2006b      | PLA:BUP:ESC | x | x |
| 363 | 2004 | DeMartinis2007    | PLA:DES     | x | x |
| 364 | 2004 | Dimidjian2006     | PLA:PAR     | - | x |
| 365 | 2004 | Feiger2009        | PLA:DES     | x | x |
| 366 | 2004 | Gastpar2006       | PLA:CIT     | x | x |
| 367 | 2004 | Jefferson2006     | PLA:BUP     | x | x |
| 368 | 2004 | Keller2006a       | PLA:PAR     | - | x |
| 369 | 2004 | Kennedy2005       | ESC:FLO     | x | x |
| 370 | 2004 | Li2006            | CIT:ESC     | x | x |
| 371 | 2004 | Lieberman2008a    | PLA:VEN     | x | x |
| 372 | 2004 | Lieberman2008b    | PLA:VEN     | x | x |
| 373 | 2004 | Liebowitz2007     | PLA:DES     | x | x |
| 374 | 2004 | Munizza2006       | SER:TRA     | x | x |
| 375 | 2004 | Perahia2006       | PLA:DUL:PAR | x | x |
| 376 | 2004 | Raskin2007        | PLA:DUL     | x | x |
| 377 | 2004 | SCT-MD-09         | ESC:FLO     | - | x |
| 378 | 2004 | Schatzberg2006a   | PLA:FLO:VEN | x | x |
| 379 | 2004 | Septien-Velez2007 | PLA:DES     | x | x |

|     |      |                 |             |   |   |
|-----|------|-----------------|-------------|---|---|
| 380 | 2004 | Shelton2006     | SER:VEN     | x | x |
| 381 | 2004 | Study043        | CIT:REB     | x | - |
| 382 | 2004 | Szegedi2006     | MIR:VEN     | x | x |
| 383 | 2004 | Thase2006       | BUP:VEN     | x | x |
| 384 | 2005 | Hewett2009      | PLA:BUP:VEN | x | x |
| 385 | 2005 | Hewett2010a     | PLA:BUP     | x | x |
| 386 | 2005 | Hewett2010b     | PLA:VEN     | x | x |
| 387 | 2005 | Keller2007      | FLO:VEN     | x | - |
| 388 | 2005 | Khan2007        | DUL:ESC     | x | x |
| 389 | 2005 | Lee2007         | DUL:PAR     | x | x |
| 390 | 2005 | Nemeroff2007    | PLA:FLO:VEN | x | x |
| 391 | 2005 | Nierenberg2007  | PLA:DUL:ESC | x | x |
| 392 | 2005 | Rapaport2009    | PLA:PAR     | x | x |
| 393 | 2005 | Ventura2007     | ESC:SER     | x | x |
| 394 | 2005 | Wade2007        | DUL:ESC     | x | x |
| 395 | 2005 | Yevtushenko2007 | CIT:ESC     | x | - |
| 396 | 2006 | Binnemann2008   | PLA:SER     | x | x |
| 397 | 2006 | CL3-20098-048   | AGO:PAR     | x | x |
| 398 | 2006 | Corruble2013    | AGO:ESC     | x | x |
| 399 | 2006 | Hale2010        | AGO:FLO     | x | x |
| 400 | 2006 | Khan/2007       | DUL:ESC     | x | - |
| 401 | 2006 | Mao2008         | ESC:FLO     | x | x |
| 402 | 2006 | Perahia2008a    | DUL:VEN     | x | x |
| 403 | 2006 | Perahia2008b    | DUL:VEN     | x | x |
| 404 | 2007 | 0600A-626       | FLO:VEN     | - | x |
| 405 | 2007 | 0600A-654       | FLO:VEN     | - | x |
| 406 | 2007 | Alvarez2012     | PLA:VEN:VOR | x | x |
| 407 | 2007 | Barber2011      | PLA:SER     | x | - |
| 408 | 2007 | Boyer2008       | PLA:DES     | x | x |
| 409 | 2007 | Cutler2009      | PLA:DUL     | x | x |
| 410 | 2007 | Debonnel2000    | MIR:PAR     | x | x |
| 411 | 2007 | Heller2009      | FLO:VEN     | x | - |
| 412 | 2007 | Higuchi2009     | PLA:DUL:PAR | x | x |
| 413 | 2007 | Hu2009          | CIT:ESC     | x | - |
| 414 | 2007 | Jiang2009       | CIT:ESC     | - | x |
| 415 | 2007 | Kinoshita2009   | PLA:MIR     | x | x |
| 416 | 2007 | Montgomery2013  | PLA:LEV     | x | x |
| 417 | 2007 | Mundt2012       | PLA:SER     | - | x |
| 418 | 2007 | Rickels2009     | PLA:VIL     | x | x |
| 419 | 2007 | Tourian2009     | PLA:DES:DUL | x | x |
| 420 | 2007 | Wang2014        | PLA:ESC     | x | x |
| 421 | 2008 | AK1102365       | PLA:BUP     | x | x |
| 422 | 2008 | CAGO178A2303    | PLA:AGO:PAR | x | x |

|     |      |                     |             |   |   |
|-----|------|---------------------|-------------|---|---|
| 423 | 2008 | CL3-20098-062       | AGO:DUL     | x | x |
| 424 | 2008 | Dube2010            | PLA:ESC     | x | x |
| 425 | 2008 | Griebel2012         | PLA:ESC     | x | x |
| 426 | 2008 | Griebel2012b        | PLA:PAR     | x | x |
| 427 | 2008 | Jain2013            | PLA:VOR     | x | x |
| 428 | 2008 | Kornstein2010       | PLA:DES     | x | x |
| 429 | 2008 | Learned2012aStudy1  | PLA:VEN     | x | x |
| 430 | 2008 | Learned2012bStudy2  | PLA:PAR     | x | x |
| 431 | 2008 | Li2010              | CIT:ESC     | x | - |
| 432 | 2008 | Liebowitz2008       | PLA:DES     | x | x |
| 433 | 2008 | Mahableshwarkar2013 | PLA:DUL:VOR | x | x |
| 434 | 2008 | Ou2010              | CIT:ESC     | x | x |
| 435 | 2008 | Quera-Salva2010     | AGO:ESC     | x | x |
| 436 | 2008 | Soares/2010         | DES:ESC     | x | - |
| 437 | 2008 | Stahl2010           | PLA:AGO     | x | x |
| 438 | 2008 | Zajacka2010         | PLA:AGO     | x | x |
| 439 | 2009 | Baldwin2012         | PLA:DUL:VOR | x | x |
| 440 | 2009 | CL3-20098-070       | PLA:AGO     | x | x |
| 441 | 2009 | Dunlop2011          | PLA:DES     | x | x |
| 442 | 2009 | Grunebaum2011       | BUP:PAR     | x | x |
| 443 | 2009 | Henigsberg2012      | PLA:VOR     | x | x |
| 444 | 2009 | Hirayasu2011a       | PLA:ESC     | x | x |
| 445 | 2009 | Hirayasu2011b       | PLA:ESC:PAR | x | x |
| 446 | 2009 | Hsu2011             | CIT:SER     | x | - |
| 447 | 2009 | Khan2011            | PLA:VIL     | x | x |
| 448 | 2009 | Robinson2014        | PLA:DUL     | - | x |
| 449 | 2009 | SCT-MD-49           | PLA:ESC     | x | x |
| 450 | 2009 | Sheehan2009b        | PLA:TRA     | x | x |
| 451 | 2010 | 244(EMD68843-009)   | PLA:FLO     | x | - |
| 452 | 2010 | 245(EMD68843-010)   | PLA:FLO:VIL | x | - |
| 453 | 2010 | 246(SB659746-003)   | PLA:CIT:VIL | x | - |
| 454 | 2010 | 247(SB659746-014)   | PLA:VIL     | x | x |
| 455 | 2010 | 248(SB659746-002)   | PLA:VIL     | x | x |
| 456 | 2010 | Gommoll2014         | PLA:LEV     | x | x |
| 457 | 2010 | Higuchi2011         | PLA:PAR     | x | x |
| 458 | 2010 | Iwata2013           | PLA:DES     | x | x |
| 459 | 2010 | Kasper2012          | PLA:ESC     | x | x |
| 460 | 2010 | Katona2012          | PLA:DUL:VOR | x | x |
| 461 | 2010 | Khazaie/2015        | FLO:SER:TRA | x | - |
| 462 | 2010 | Liebowitz2013       | PLA:DES     | x | x |
| 463 | 2010 | Mischoulon2014      | PLA:ESC     | x | x |
| 464 | 2010 | NCT00822744         | PLA:ESC     | - | x |
| 465 | 2010 | NCT01020799         | PLA:ESC     | x | x |

|     |      |                      |             |   |   |
|-----|------|----------------------|-------------|---|---|
| 466 | 2010 | NCT01145755          | PLA:DUL     | x | x |
| 467 | 2010 | Wang/2015            | DUL:PAR     | x | x |
| 468 | 2011 | Asnis2013            | PLA:LEV     | x | x |
| 469 | 2011 | Boulenger2014        | PLA:DUL:VOR | x | x |
| 470 | 2011 | Brunoni2012          | PLA:SER     | x | - |
| 471 | 2011 | Clayton2013          | PLA:DES     | x | x |
| 472 | 2011 | Heun2013             | PLA:AGO     | x | x |
| 473 | 2011 | Kamijima2013         | MIL:PAR     | x | x |
| 474 | 2011 | Kennedy2014          | PLA:AGO     | x | x |
| 475 | 2011 | Lv2013               | CIT:ESC     | x | - |
| 476 | 2011 | Sambunaris2014       | PLA:LEV     | x | x |
| 477 | 2012 | Bakish2014           | PLA:LEV     | x | x |
| 478 | 2012 | Clayton2015          | PLA:DES     | x | x |
| 479 | 2012 | Hao2014              | DUL:PAR     | x | - |
| 480 | 2012 | Jacobsen2015         | PLA:VOR     | x | x |
| 481 | 2012 | Koshino2013          | PLA:BUP     | x | x |
| 482 | 2012 | Mahableshwarkar2015a | PLA:DUL:VOR | x | x |
| 483 | 2012 | Mahableshwarkar2015b | PLA:VOR     | x | x |
| 484 | 2012 | NCT01254305          | PLA:LEV     | - | x |
| 485 | 2012 | NCT01255787          | PLA:VOR     | x | x |
| 486 | 2012 | NCT01355081          | PLA:VOR     | x | x |
| 487 | 2012 | Shu2014              | AGO:FLO     | x | x |
| 488 | 2013 | Chang2015            | FLO:VEN     | x | - |
| 489 | 2013 | Croft2014            | PLA:VIL     | x | x |
| 490 | 2013 | Goodarzi2015         | CIT:MIR     | x | - |
| 491 | 2013 | Hosseini2015         | CIT:VEN     | - | x |
| 492 | 2013 | Mao2015              | PLA:SER     | x | x |
| 493 | 2013 | Mathews2015          | PLA:CIT:VIL | x | x |
| 494 | 2013 | McIntyre2014         | PLA:VOR     | x | x |
| 495 | 2013 | Pomara2013           | PLA:VIL     | x | - |
| 496 | 2013 | Wang2015             | VEN:VOR     | x | x |
| 497 | 2013 | Zhang2014            | PLA:TRA     | x | x |
| 498 | 2014 | Higuchi2014          | PLA:VEN     | x | x |
| 499 | 2014 | Lundbeck/2016        | PLA:PAR:VOR | x | - |
| 500 | 2014 | Mahableshwarkar2015c | PLA:DUL:VOR | x | x |
| 501 | 2014 | NCT01808612          | PLA:FLO     | x | x |
| 502 | 2017 | Nishimura/2018       | PLA:VOR     | x | x |

---

## References

1. Moher D, Liberati A, Tetzlaff J, Altman DG, The PG. Preferred Reporting Items for Systematic Reviews and Meta-Analyses: The PRISMA Statement [Journal Article]. *PLOS Medicine*. 2009;6(7):e1000097. Available from: <https://doi.org/10.1371/journal.pmed.1000097>.
2. Cipriani A. GRISelda Open dataset, Group of Researchers Investigating Specific Efficacy of individual Drugs for Acute depression [Journal Article]. *The Lancet*. 2018;.
3. Cipriani A, Furukawa TA, Salanti G, Chaimani A, Atkinson LZ, Ogawa Y, et al. Comparative efficacy and acceptability of 21 antidepressant drugs for the acute treatment of adults with major depressive disorder: a systematic review and network meta-analysis [Journal Article]. *The Lancet*. 2018;391(10128):1357–1366. Available from: [http://dx.doi.org/10.1016/S0140-6736\(17\)32802-7](http://dx.doi.org/10.1016/S0140-6736(17)32802-7).
4. Feiger AD, Tourian KA, Rosas GR, Padmanabhan SK. A Placebo-Controlled Study Evaluating the Efficacy and Safety of Flexible-Dose Desvenlafaxine Treatment in Outpatients with Major Depressive Disorder [Journal Article]. *CNS Spectrums*. 2009;14(1):41–50. Available from: <https://www.cambridge.org/core/article/placebocontrolled-study-evaluating-the-efficacy-and-safety-of-flexible-dose-desvenlafaxine-treatment/76A9BF557365AA29766F8990CC14F19E>.
5. Septien-Velez L, Pitrosky B, Padmanabhan SK, Germain JM, Tourian KA. A randomized, double-blind, placebo-controlled trial of desvenlafaxine succinate in the treatment of major depressive disorder [Journal Article]. *International Clinical Psychopharmacology*. 2007;22(6). Available from: [https://journals.lww.com/intclinpsychopharm/Fulltext/2007/11000/A\\_randomized,\\_double\\_blind,\\_placebo\\_controlled.4.aspx](https://journals.lww.com/intclinpsychopharm/Fulltext/2007/11000/A_randomized,_double_blind,_placebo_controlled.4.aspx).
6. Liebowitz MR, Yeung PP, Entsuah R. A Randomized, Double-Blind, Placebo-Controlled Trial of Desvenlafaxine Succinate in Adult Outpatients With Major Depressive Disorder [Journal Article]. *The Journal of Clinical Psychiatry*. 2007;68(11):1663–1672.
7. Kornstein SG, Jiang Q, Reddy S, Musgnung JJ, Guico-Pabia CJ. Short-Term Efficacy and Safety of Desvenlafaxine in a Randomized, Placebo-Controlled Study of Perimenopausal and Postmenopausal Women With Major Depressive Disorder [Journal Article]. *The Journal of Clinical Psychiatry*. 2010;71(8):1088–1096.
8. Soares CN, Thase ME, Clayton A, Guico-Pabia CJ, Focht K, Jiang Q, et al. Desvenlafaxine and escitalopram for the treatment of postmenopausal women with major depressive disorder [Journal Article]. *Menopause*. 2010;17(4):700–11.
9. Nishimura A, Aritomi Y, Sasai K, Kitagawa T, Mahableshwarkar A. Randomized, double-blind, placebo-controlled 8-week trial of the efficacy, safety, and tolerability of 5, 10, and 20 mg day vortioxetine in adults with major depressive disorder [Journal Article]. *Psychiatry and Clinical Neurosciences*. 2018;72(2):64–72.
10. Wang Z, Xu X, Tan Q, Li K, Ma C, Xie S, et al. Treatment of major depressive disorders with generic duloxetine and paroxetine: a multi-centered, double-blind, double-dummy, randomized controlled clinical trial [Journal Article]. *Shanghai archives of psychiatry*. 2015;27(4):228–236.
11. Khazaie H, Rezaie L, Rezaei Payam N, Najafi F. Antidepressant-induced sexual dysfunction during treatment with fluoxetine, sertraline and trazodone; a randomized controlled trial [Journal Article]. *Gen Hosp Psychiatry*. 2015;37(1):40–5.

12. Khan A, Bose A, Alexopoulos GS, Gommoll C, Li D, Gandhi C. Double-blind comparison of escitalopram and duloxetine in the acute treatment of major depressive disorder [Journal Article]. *Clin Drug Investig*. 2007;27(7):481–92.
13. Lundbeck H. Efficacy of Vortioxetine on Cognitive Dysfunction in Working Patients With Major Depressive Disorder [Journal Article]. *Clinical Trials*. 2016;.
14. Rickels K, Amsterdam J, Clary C, Fox I, Schweizer E, Weise C. The efficacy and safety of paroxetine compared with placebo in outpatients with major depression [Journal Article]. *J Clin Psychiatry*. 1992;53 Suppl:30–2.
15. Claghorn JL. The safety and efficacy of paroxetine compared with placebo in a double-blind trial of depressed outpatients [Journal Article]. *J Clin Psychiatry*. 1992;53 Suppl:33–5.
16. Smith WT, Glaudin V. A placebo-controlled trial of paroxetine in the treatment of major depression [Journal Article]. *The Journal of Clinical Psychiatry*. 1992;53(Suppl):36–39.
17. Hamilton M. A rating scale for depression [Journal Article]. *Journal of Neurology, Neurosurgery, Psychiatry*. 1960;23(1):56–62.
18. Moncrieff J, Kirsch I. Efficacy of antidepressants in adults [Journal Article]. *BMJ (Clinical research ed)*. 2005;331(7509):155–157. Available from: <https://www.ncbi.nlm.nih.gov/pubmed/16020858><https://www.ncbi.nlm.nih.gov/pmc/PMC558707/>.
19. Altman DG, Royston P. The cost of dichotomising continuous variables [Journal Article]. *BMJ (Clinical research ed)*. 2006;332(7549):1080–1080. Available from: <https://www.ncbi.nlm.nih.gov/pubmed/16675816><https://www.ncbi.nlm.nih.gov/pmc/articles/PMC1458573/>.
20. Hengartner MP. Methodological Flaws, Conflicts of Interest, and Scientific Fallacies: Implications for the Evaluation of Antidepressants' Efficacy and Harm [Journal Article]. *Frontiers in psychiatry*. 2017;8:275–275. Available from: <https://www.ncbi.nlm.nih.gov/pubmed/29270136><https://www.ncbi.nlm.nih.gov/pmc/PMC5725408/>.
21. MacCallum RC, Zhang S, Preacher KJ, Rucker DD. On the practice of dichotomization of quantitative variables [Journal Article]. *Psychological Methods*. 2002;7(1):19–40.
22. Borenstein M, Hedges L, Higgins JPT, Rothstein H. *Introduction to Meta-Analysis*. John Wiley and Sons; 2009.
